# Supplementary material for: Detection and Genomic Characterization of Bovine Rhinitis Virus in China
Source: MDPI journal article supplement (doi:10.3390/ani13020312), 2023-01-16
Supplement: s1 [file s1]

# Phylogenetic trees for each gene of BRAV

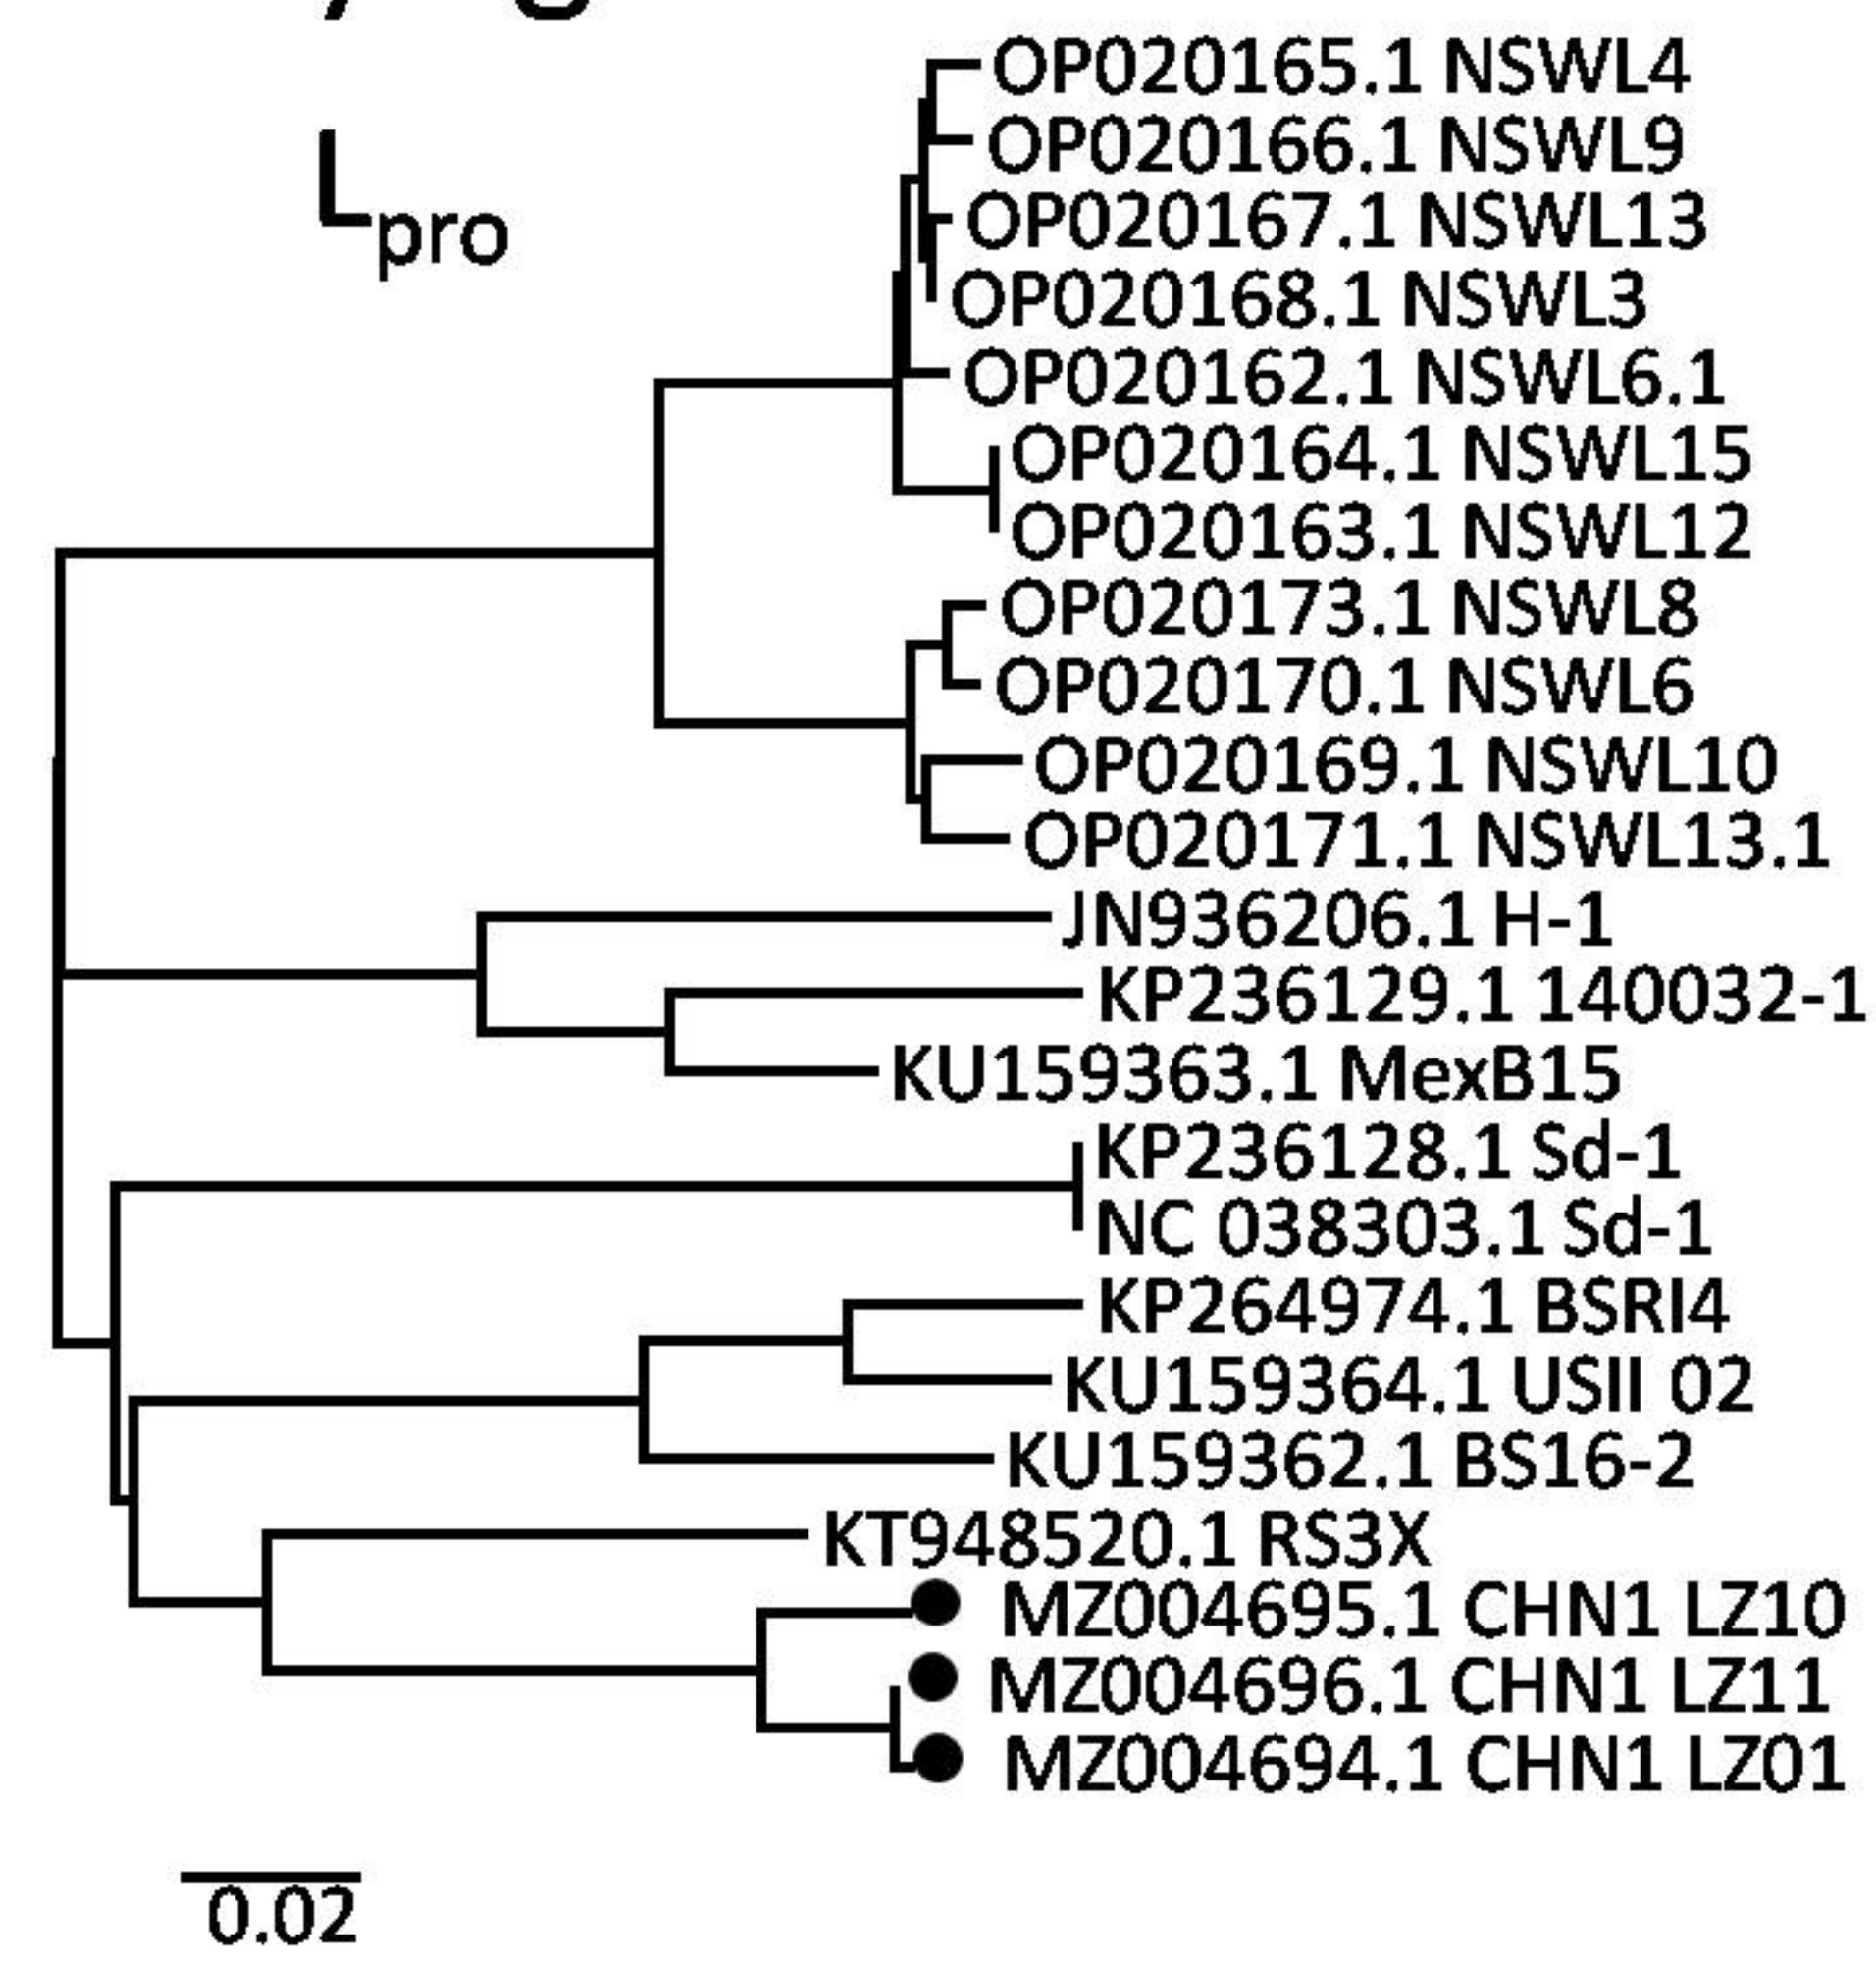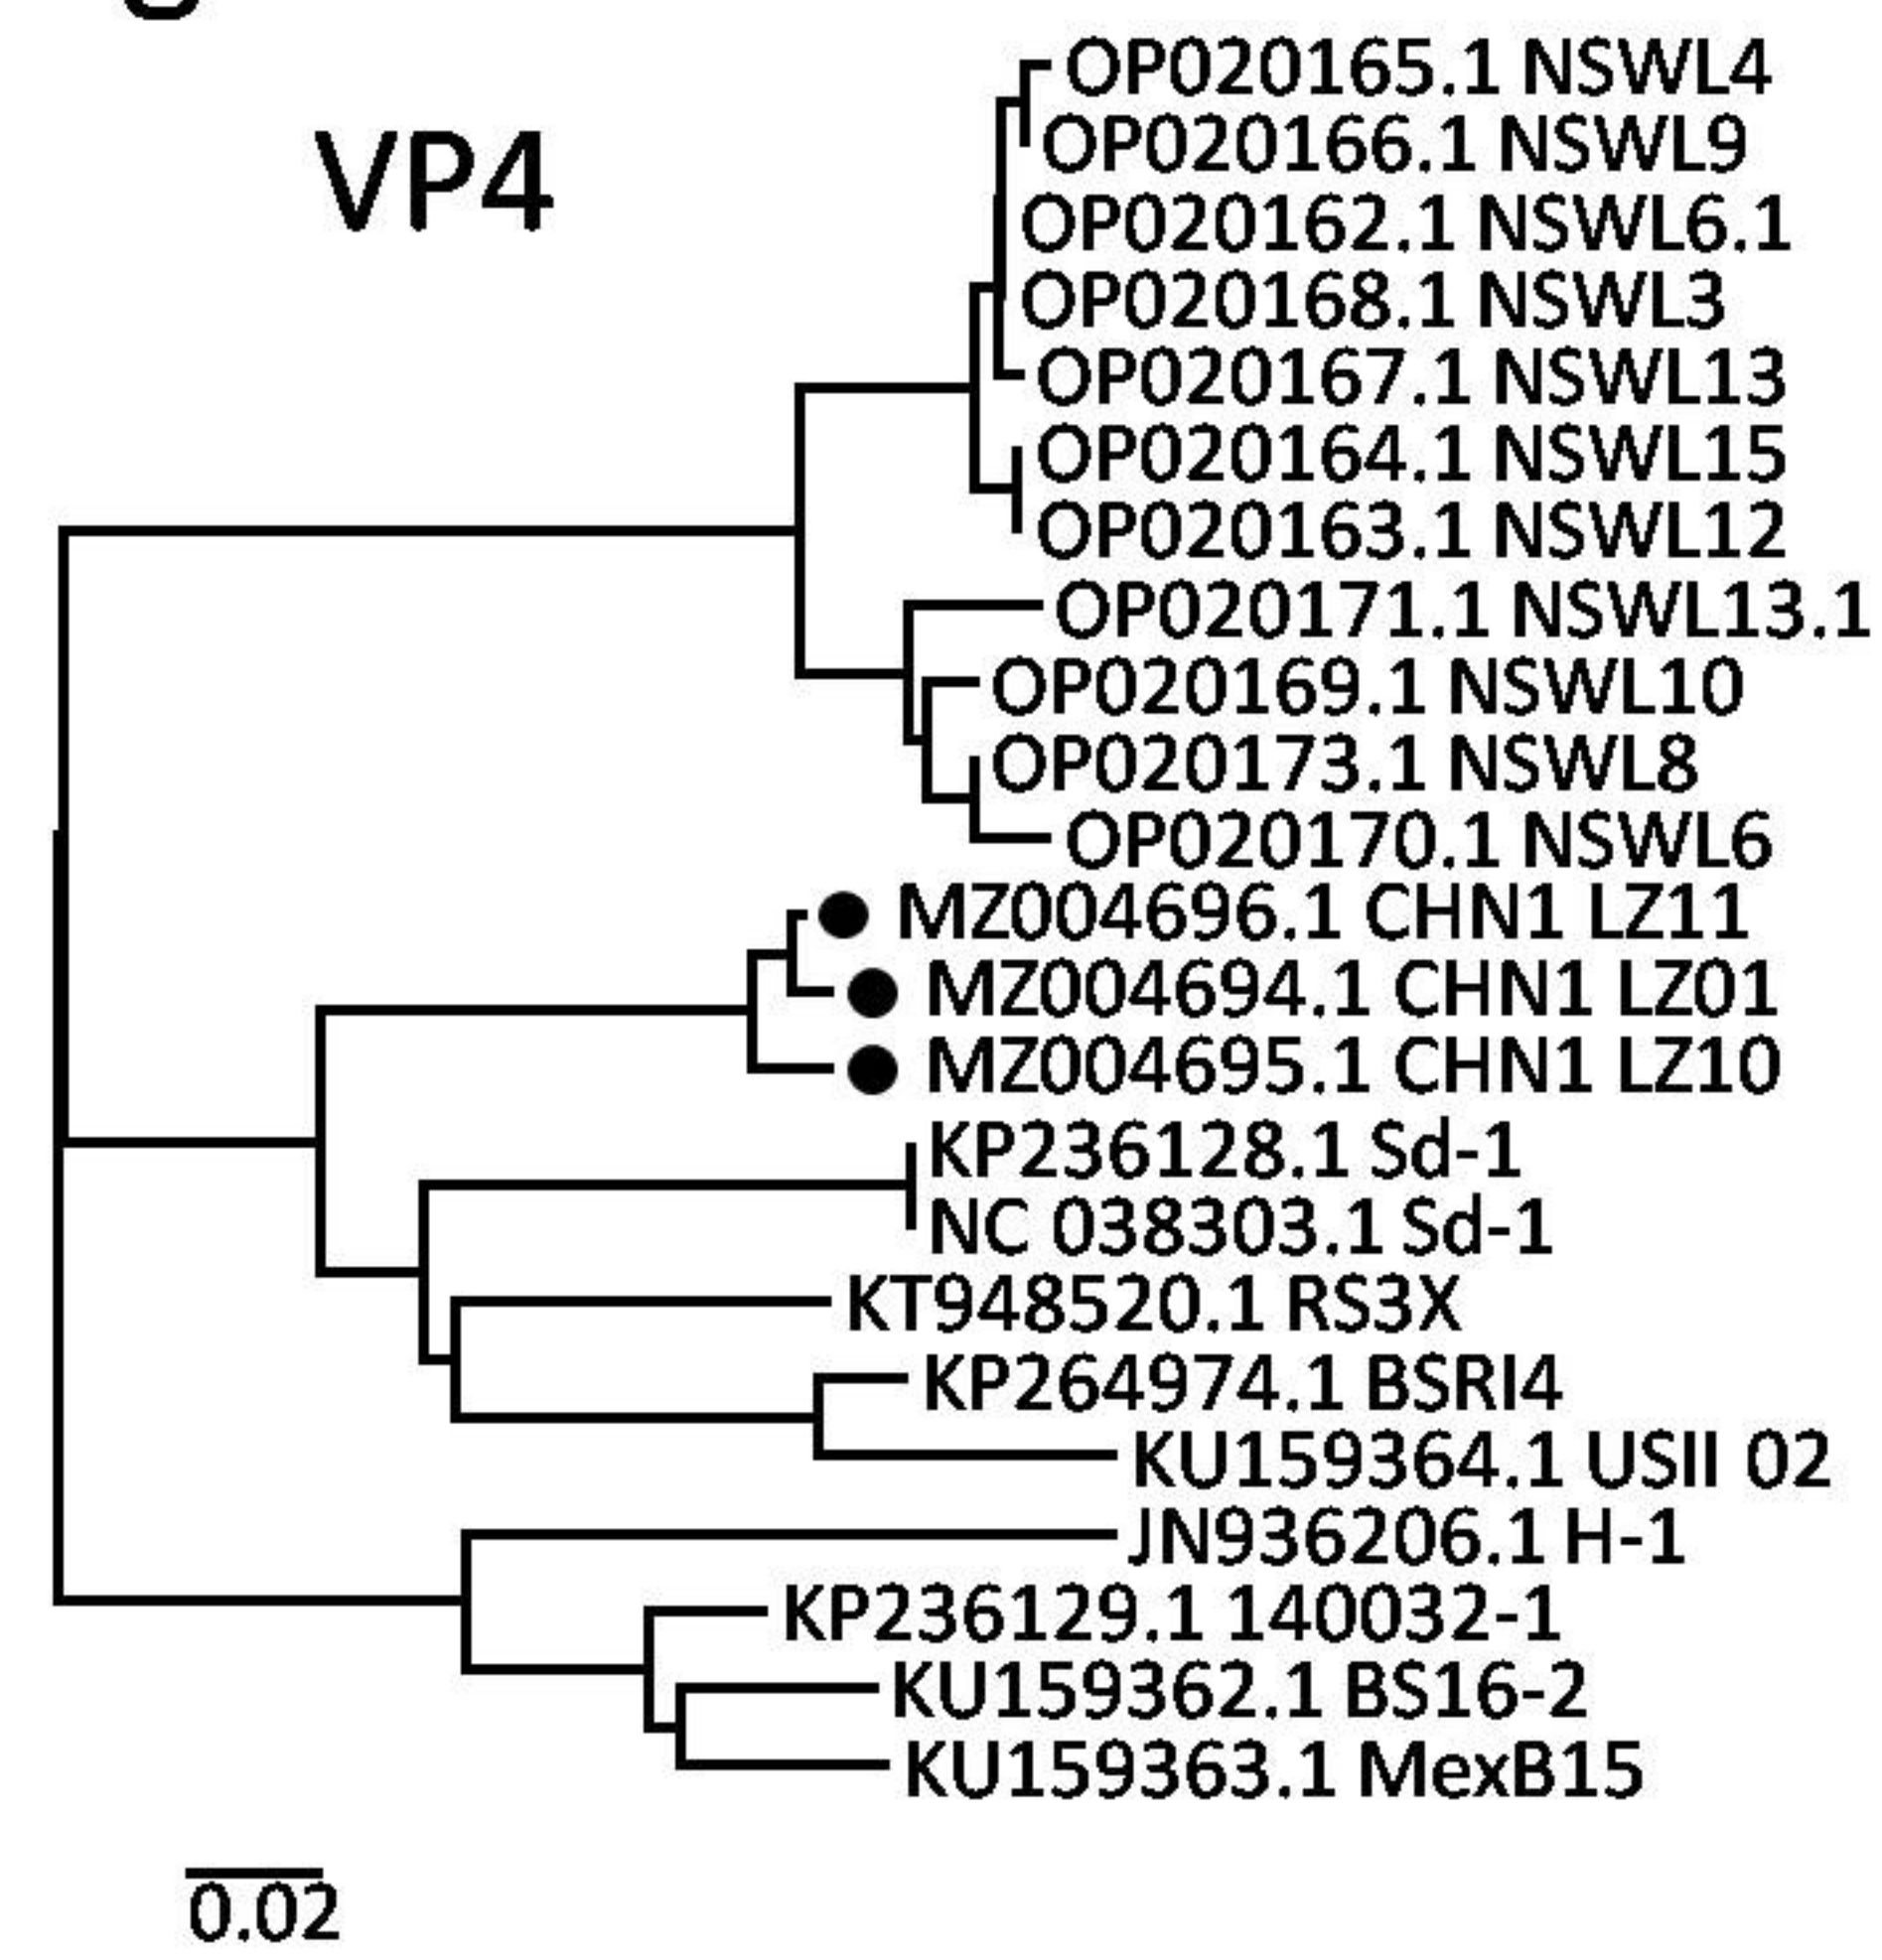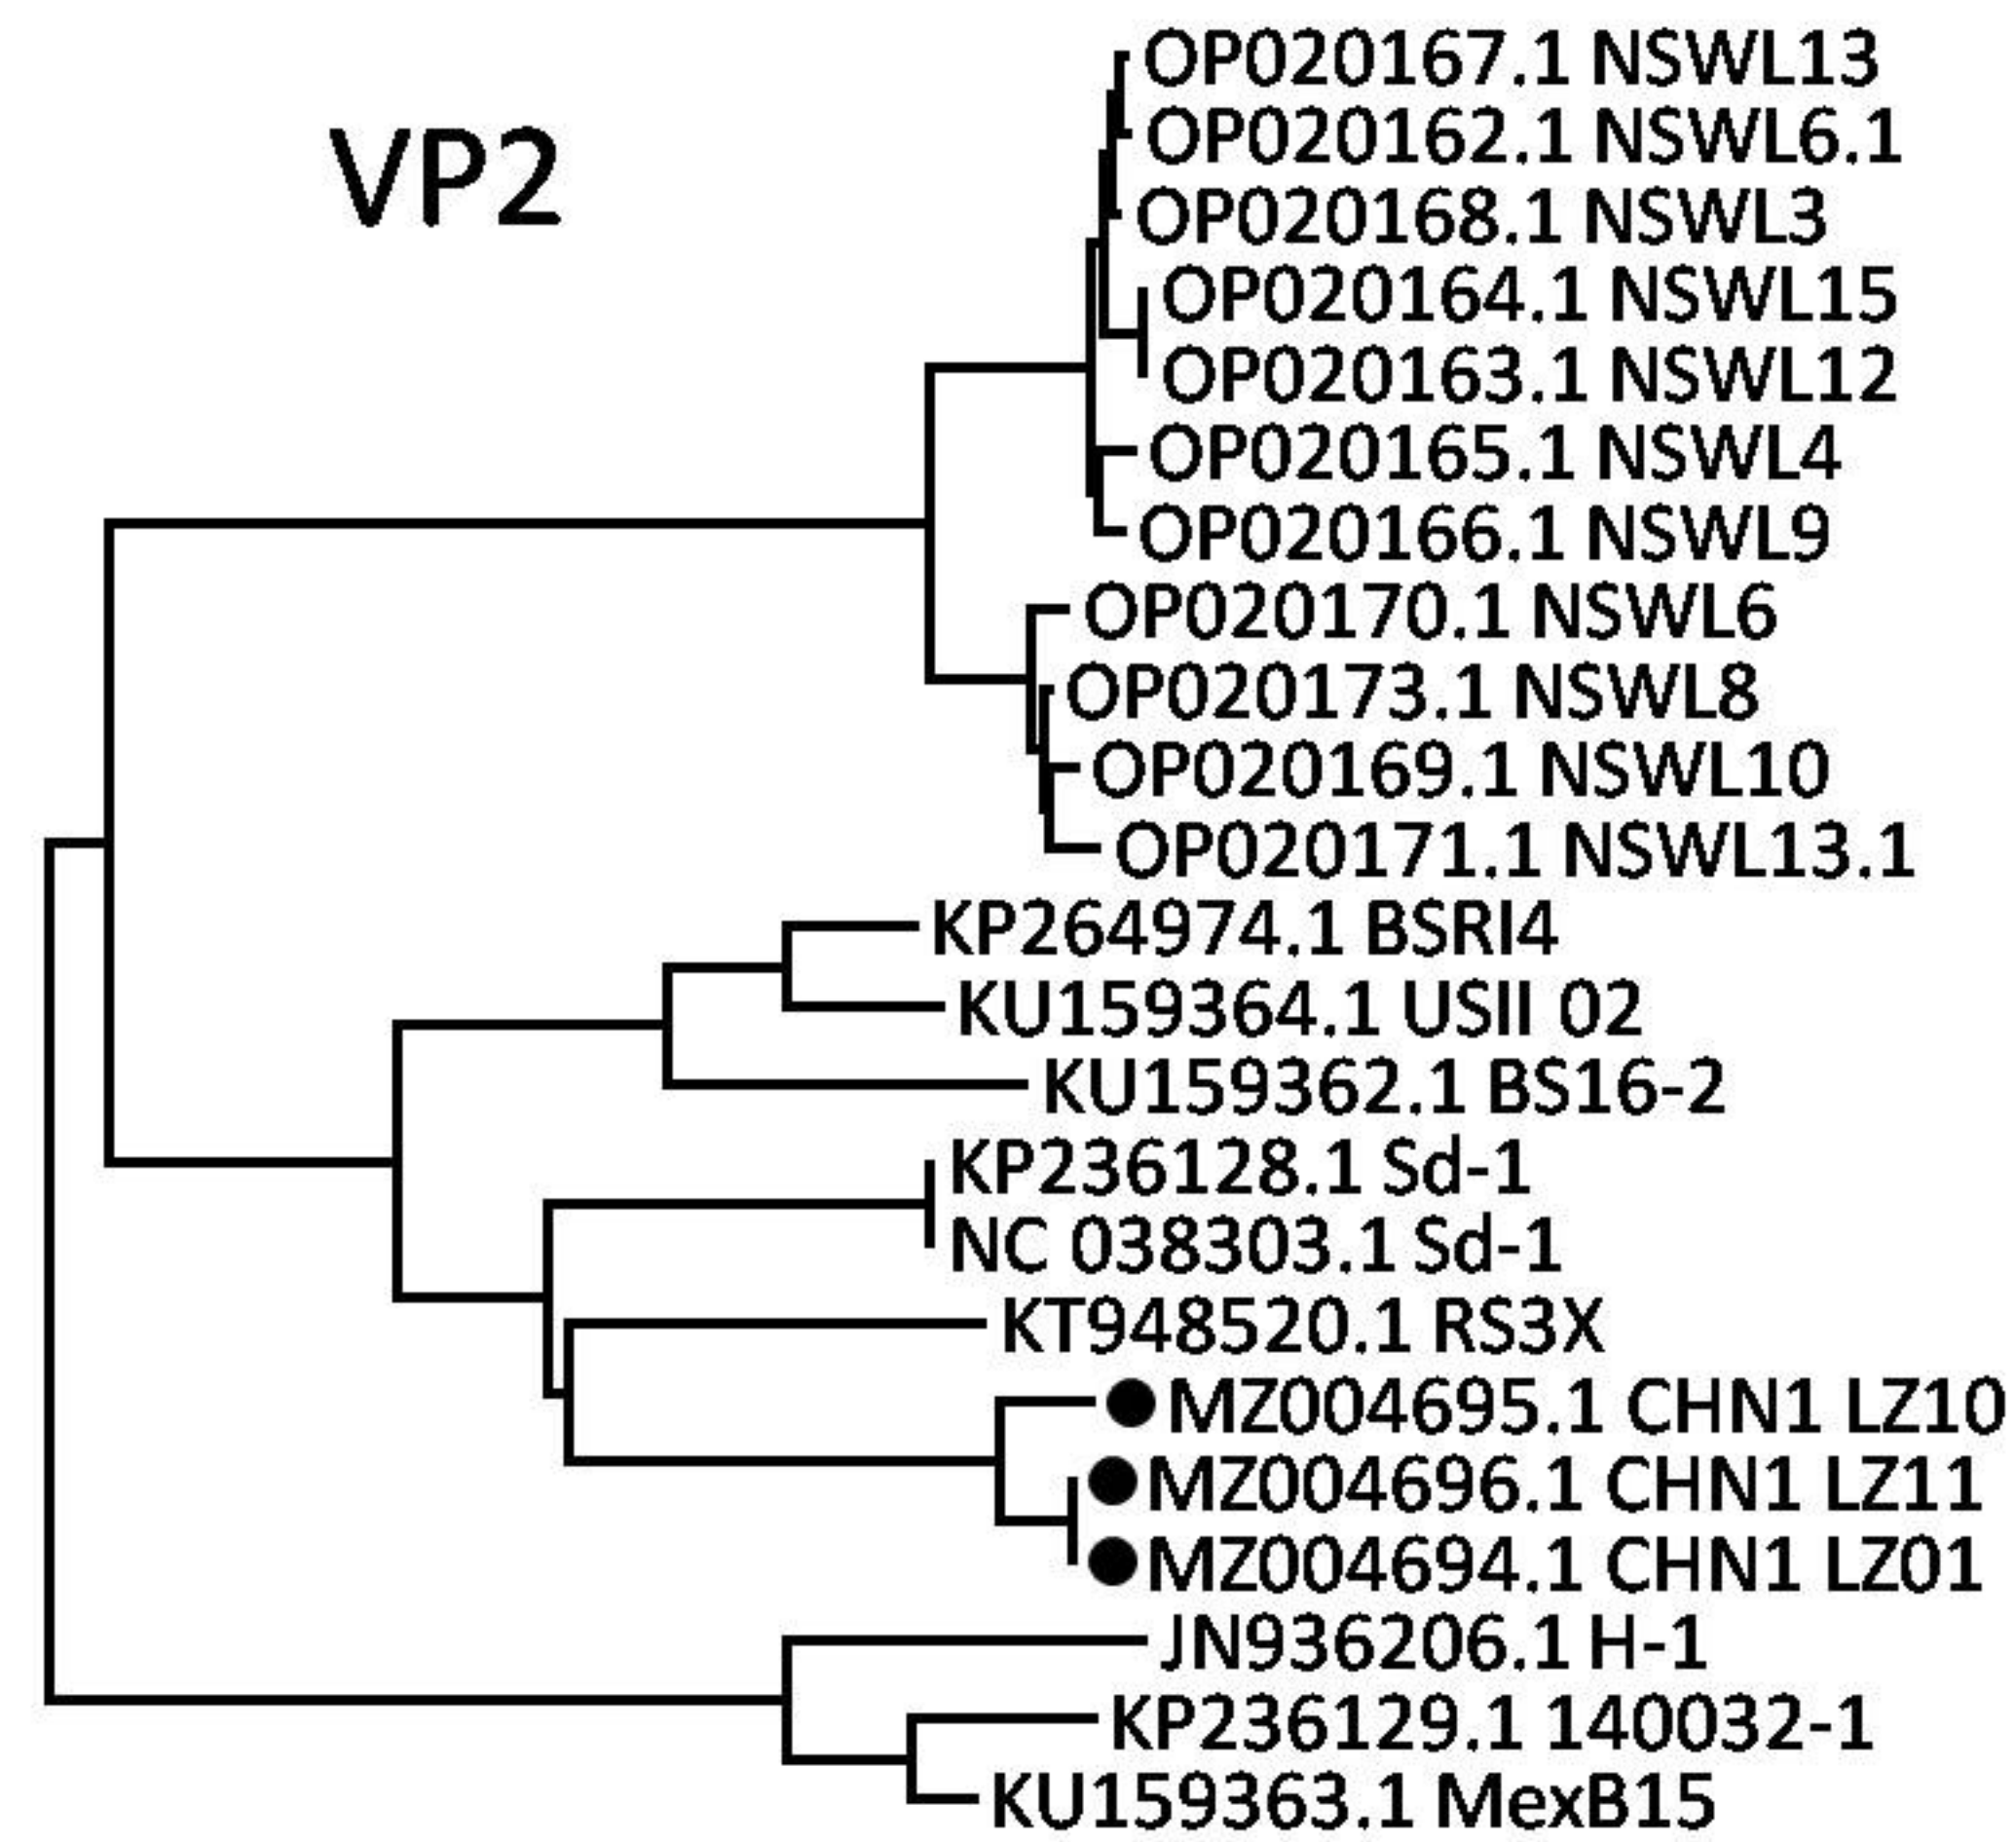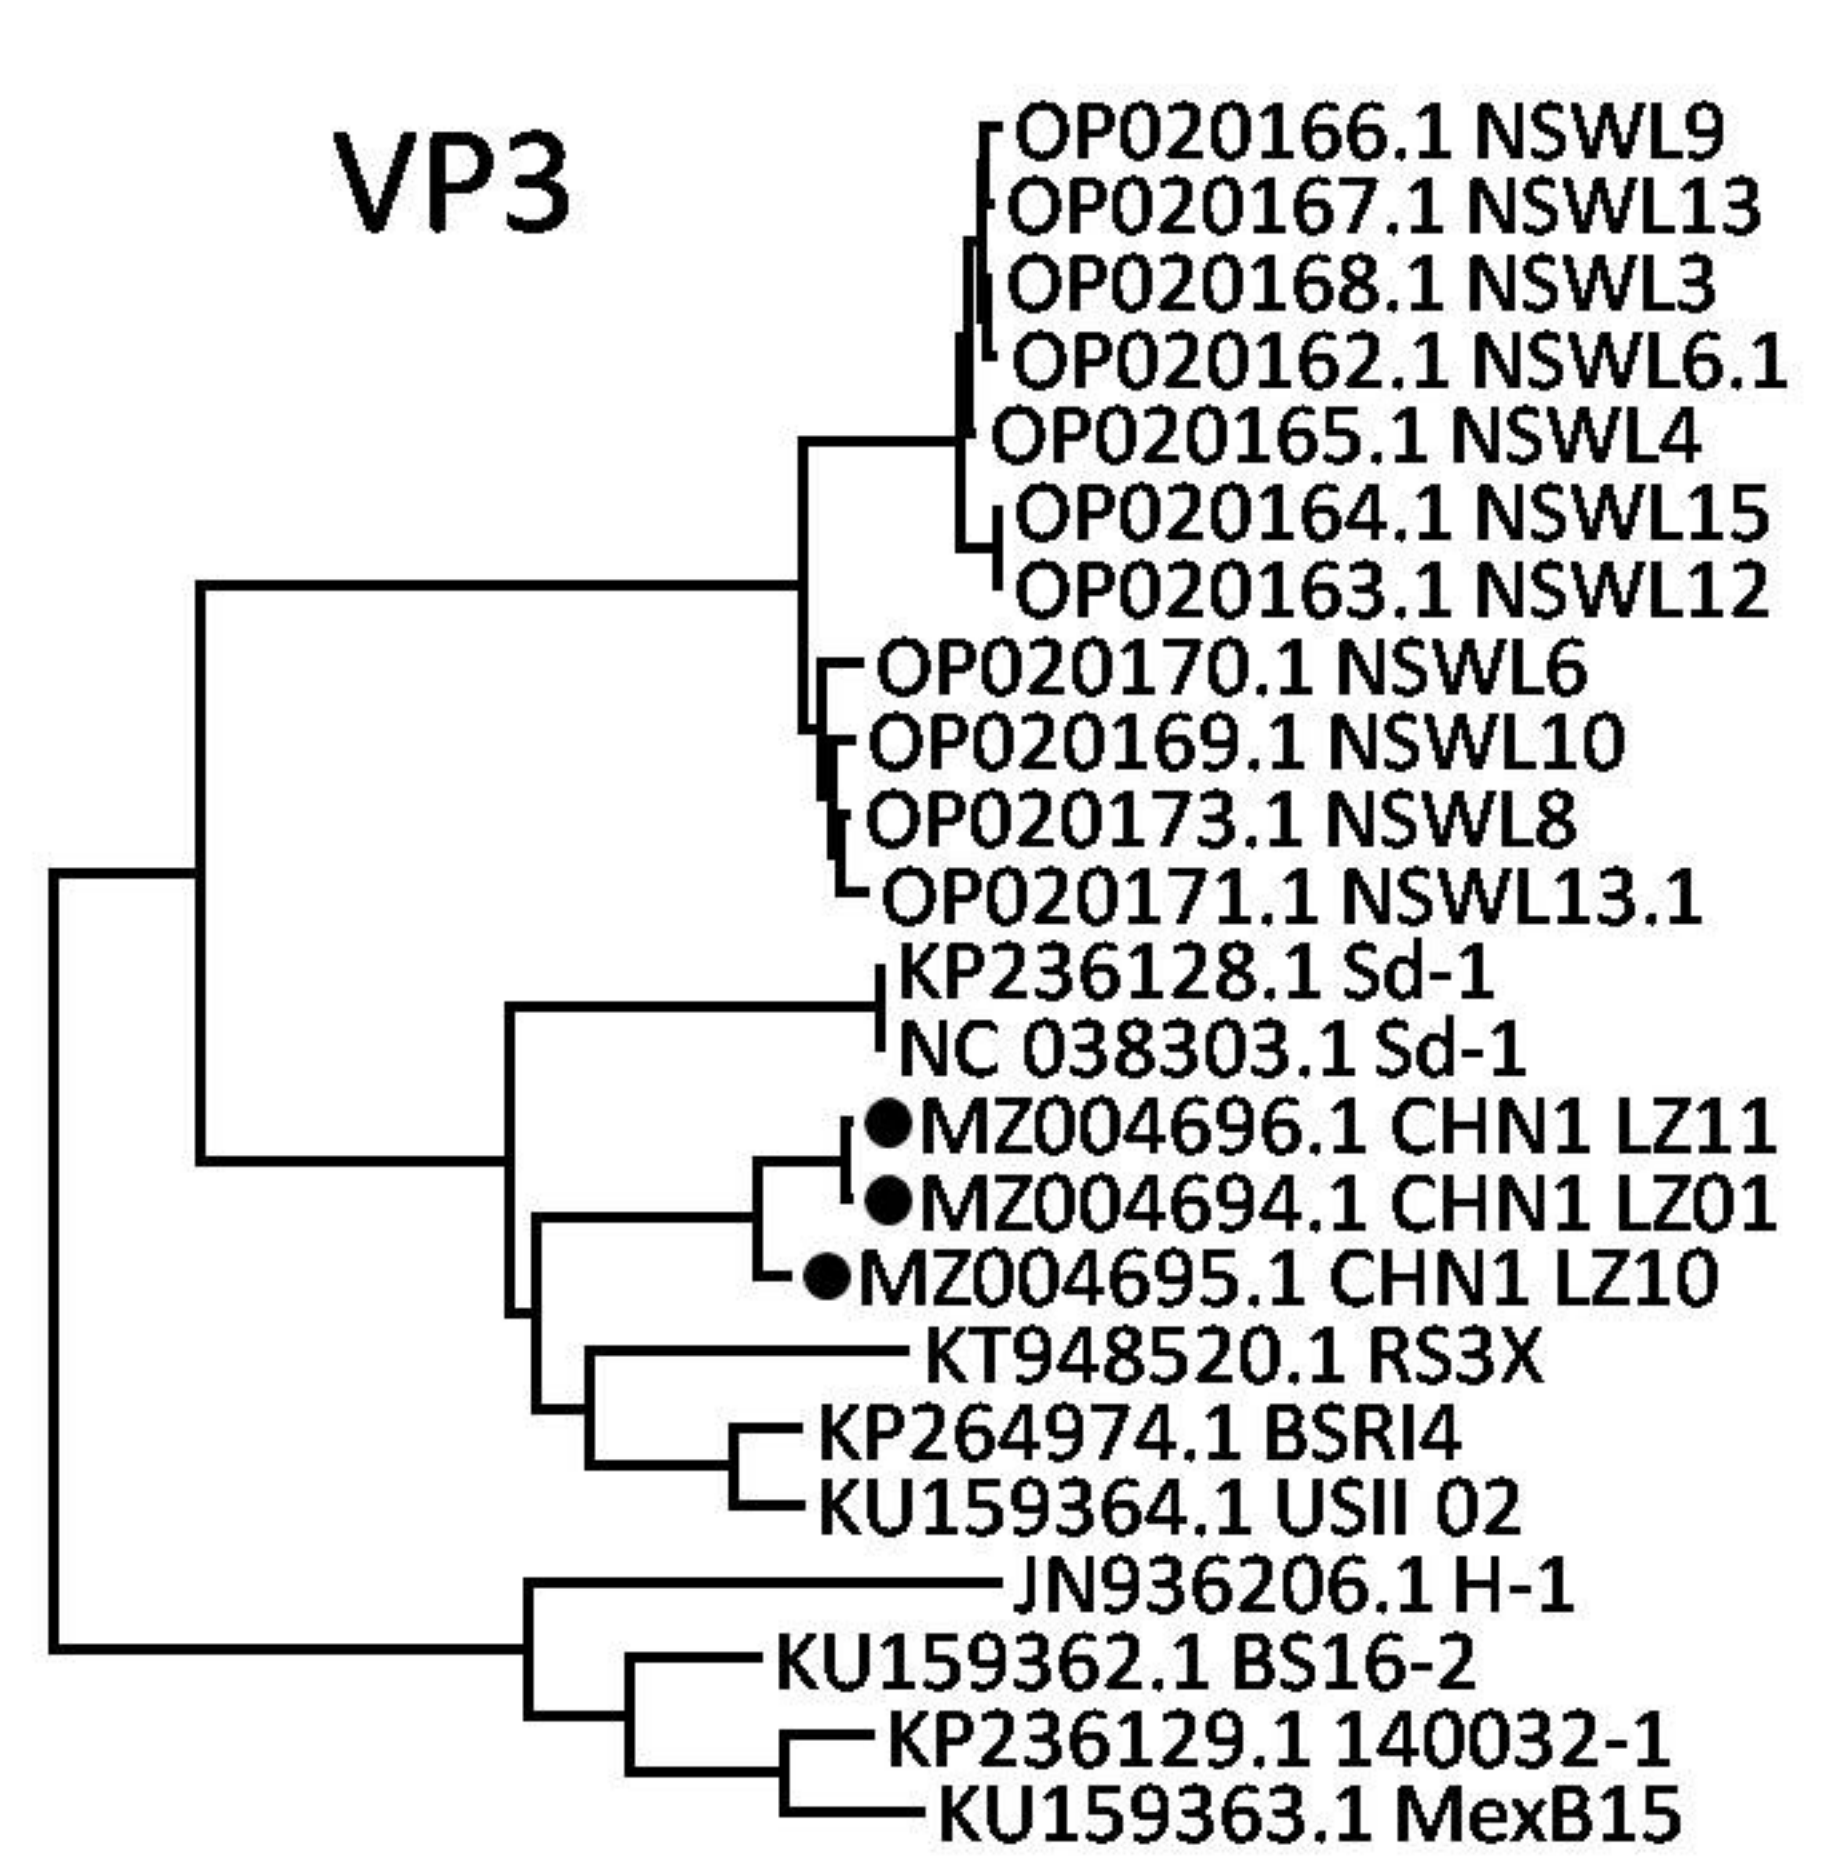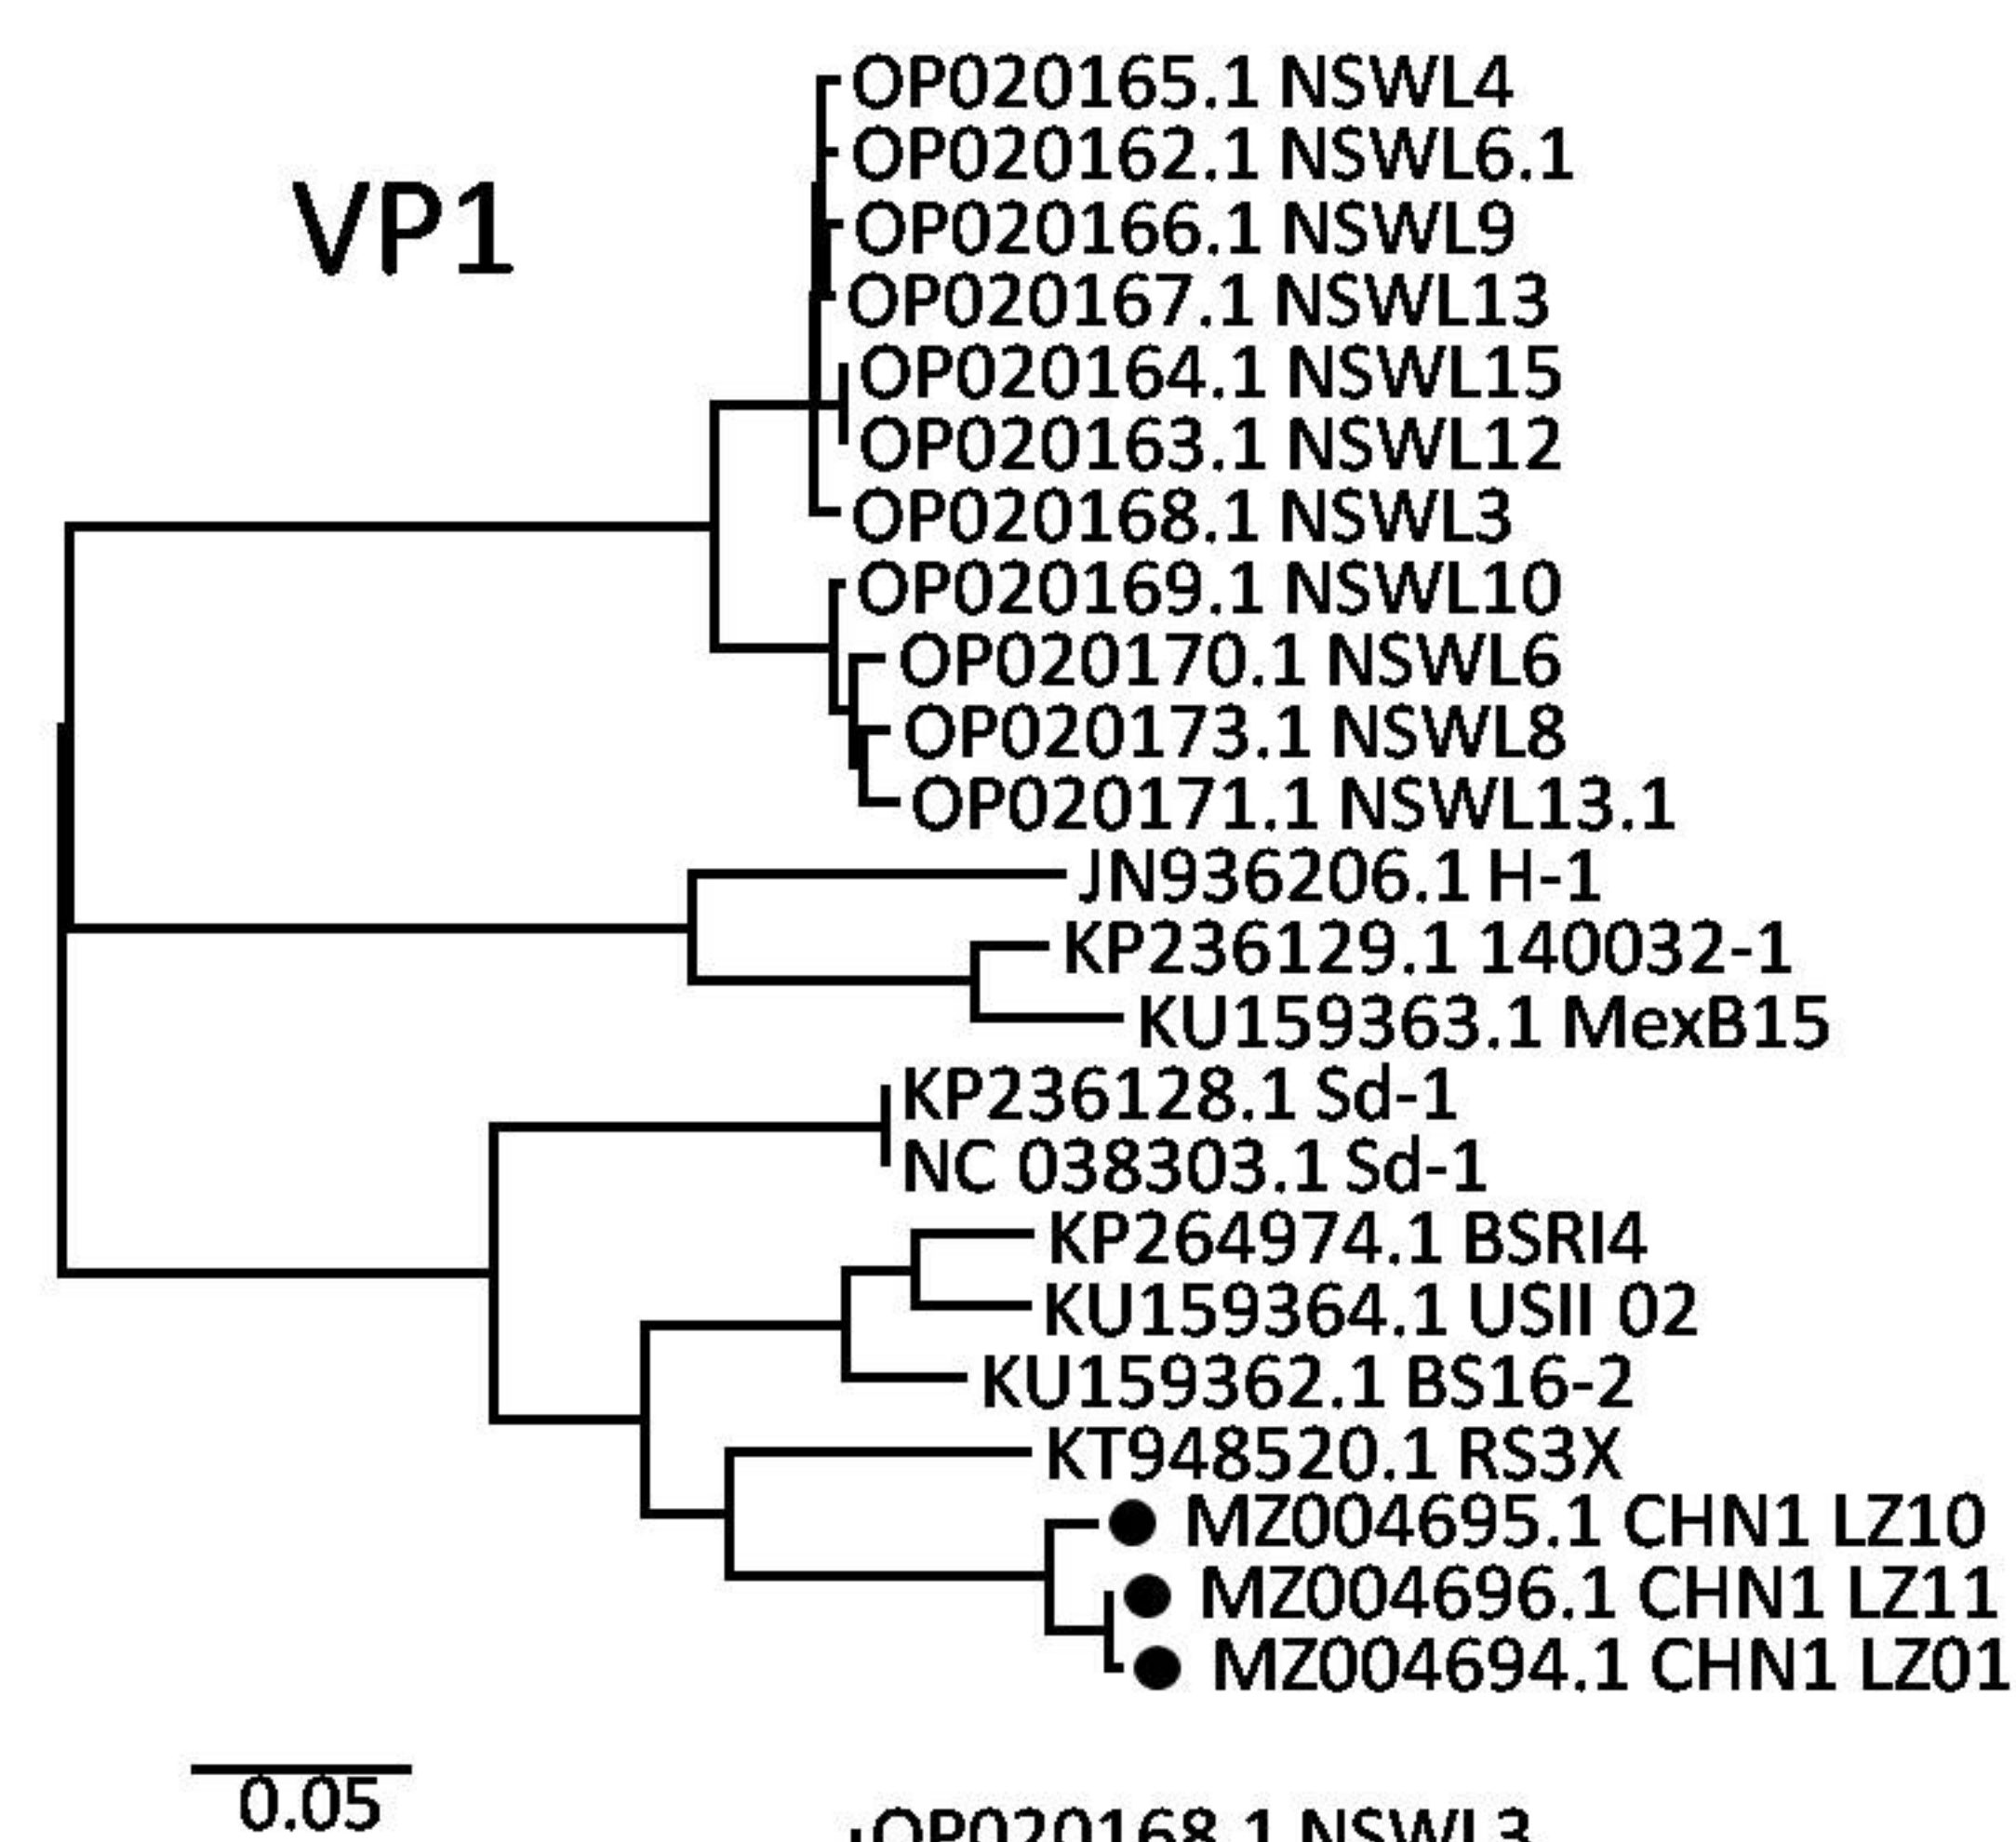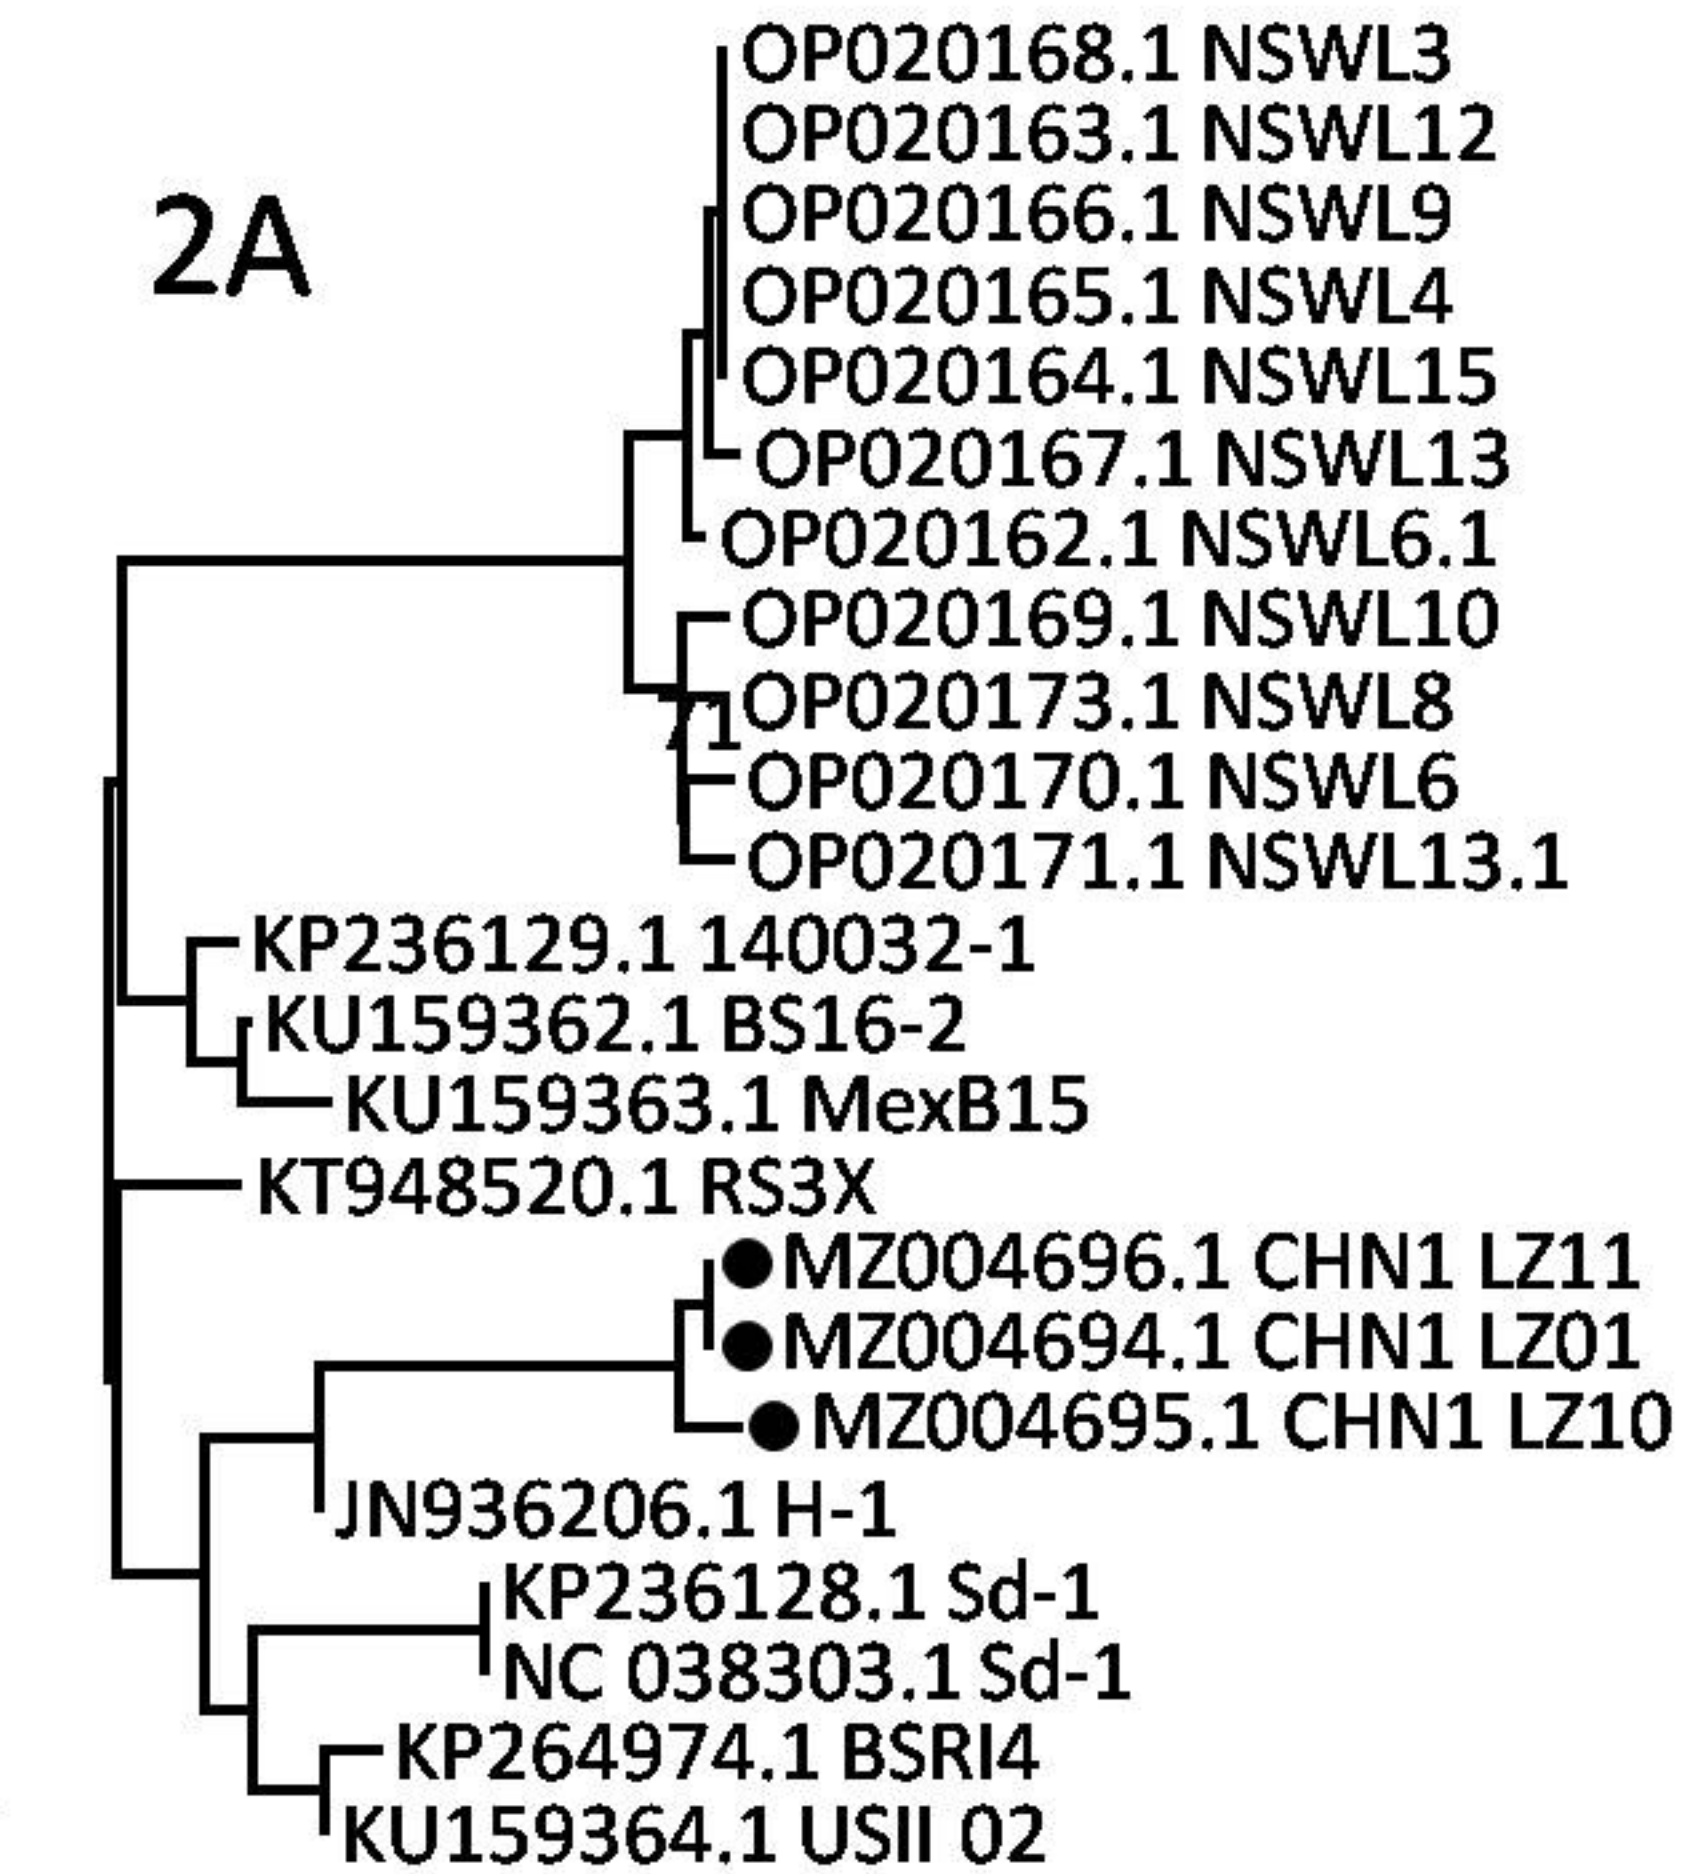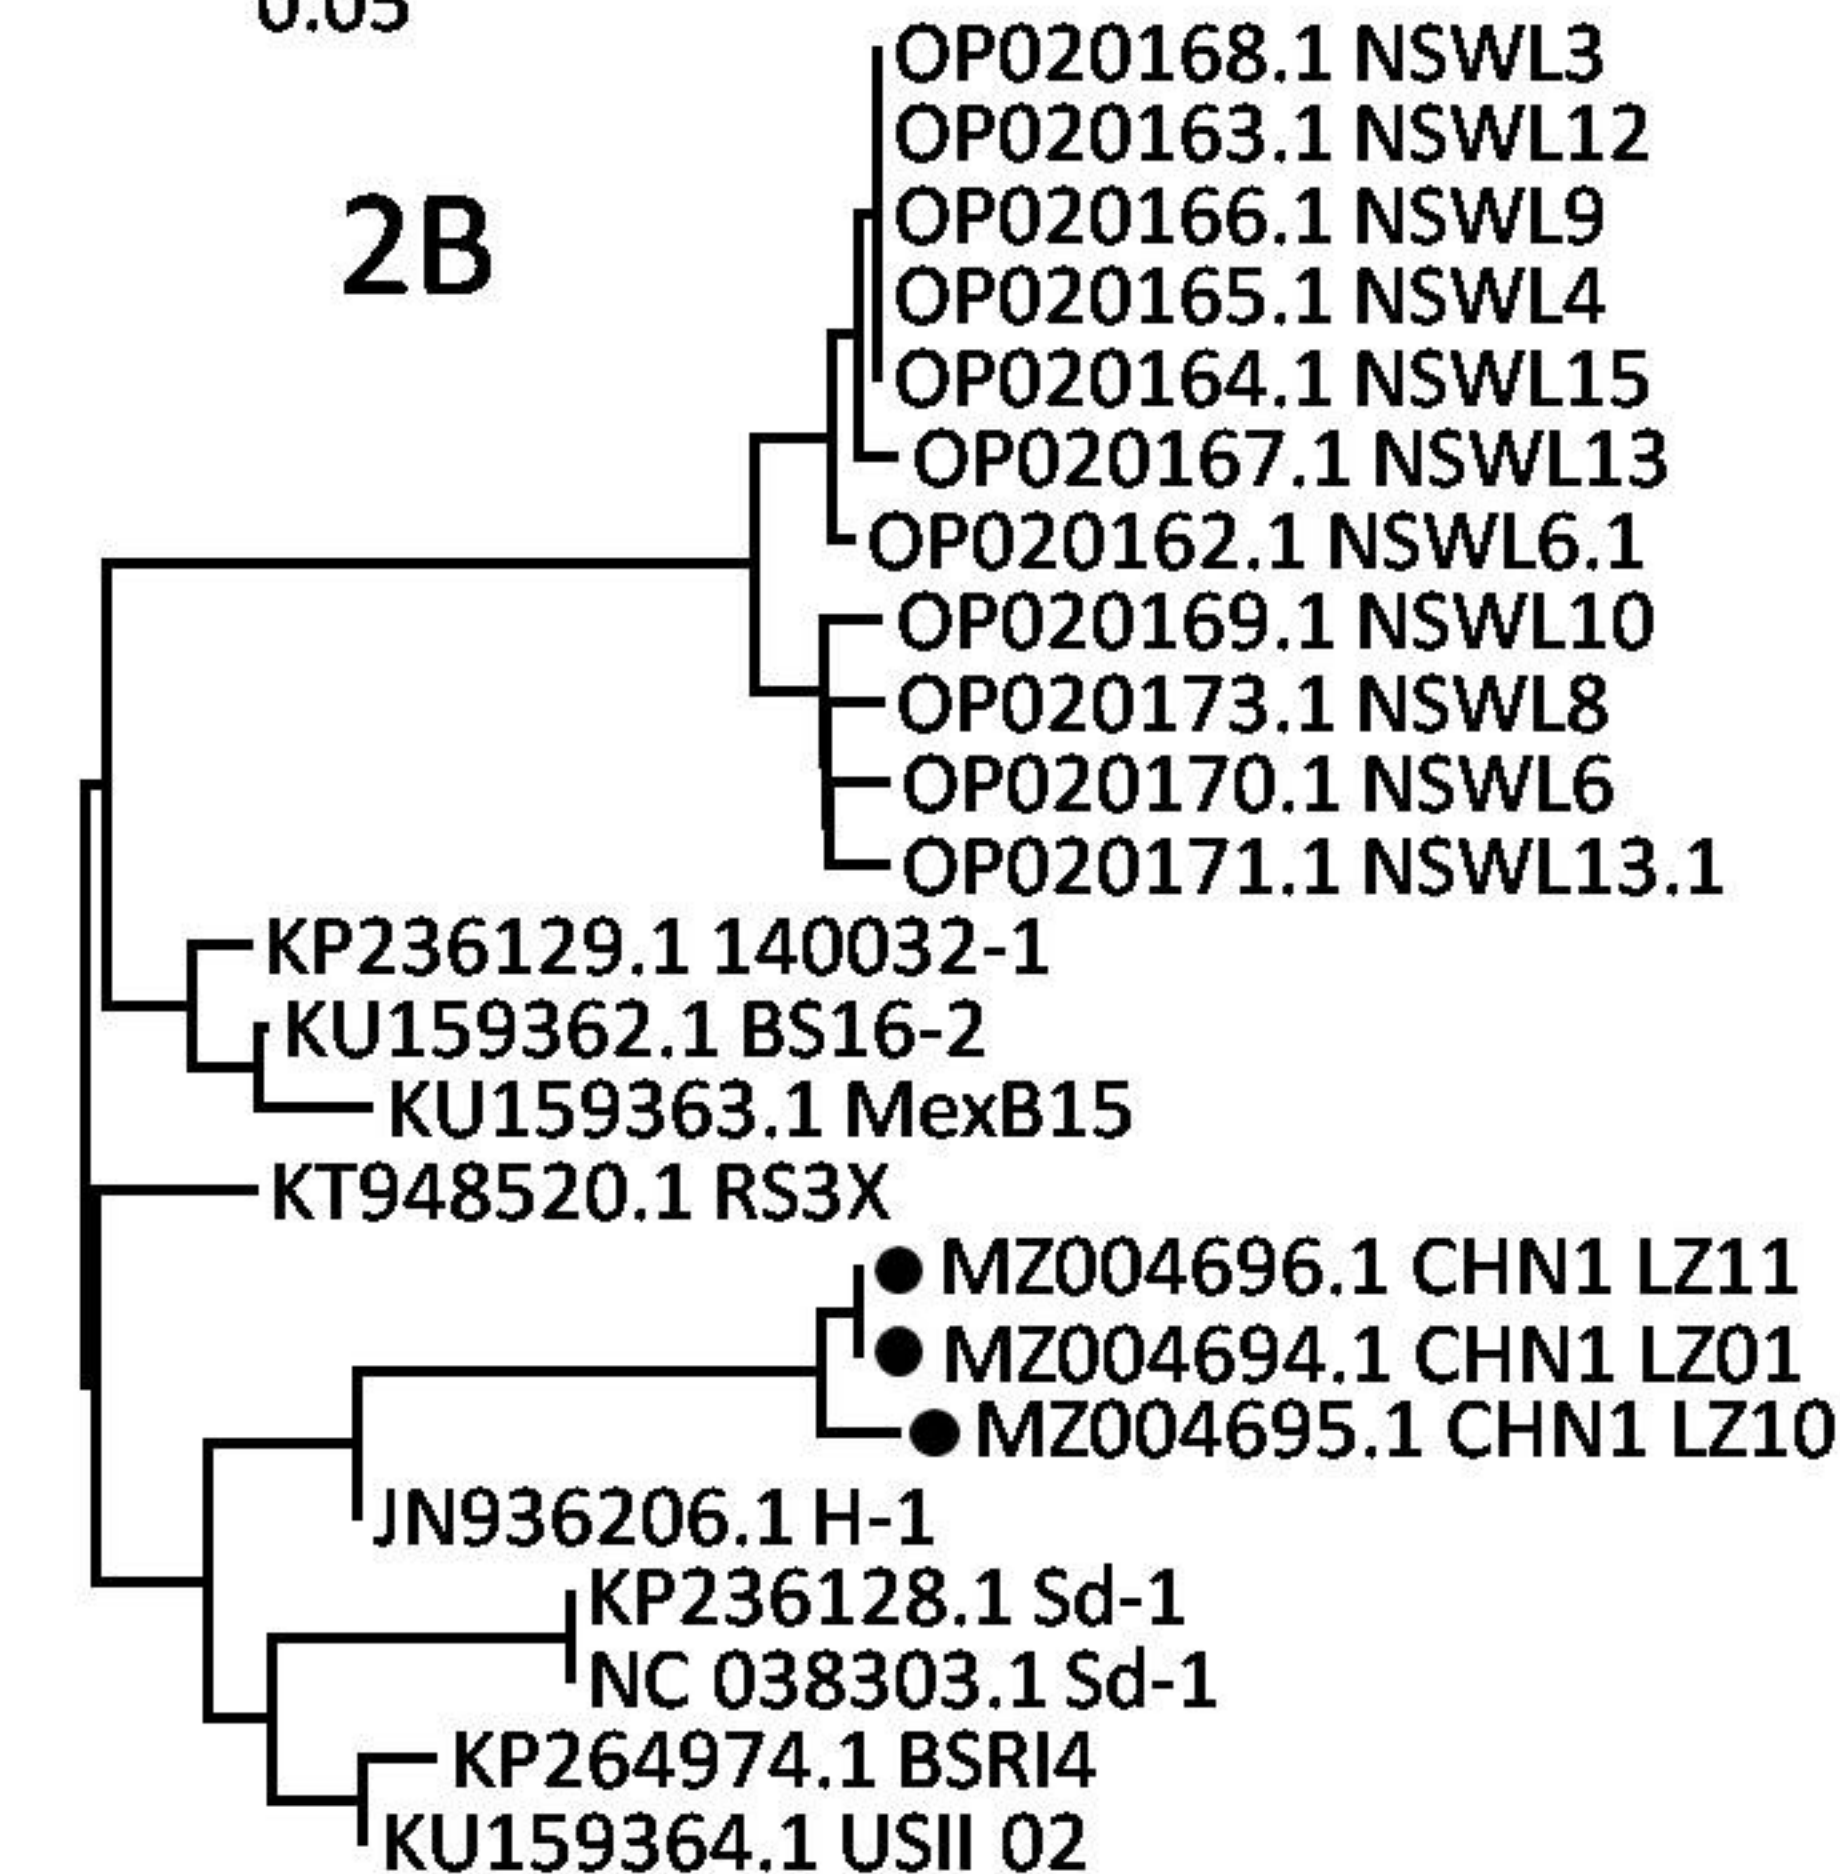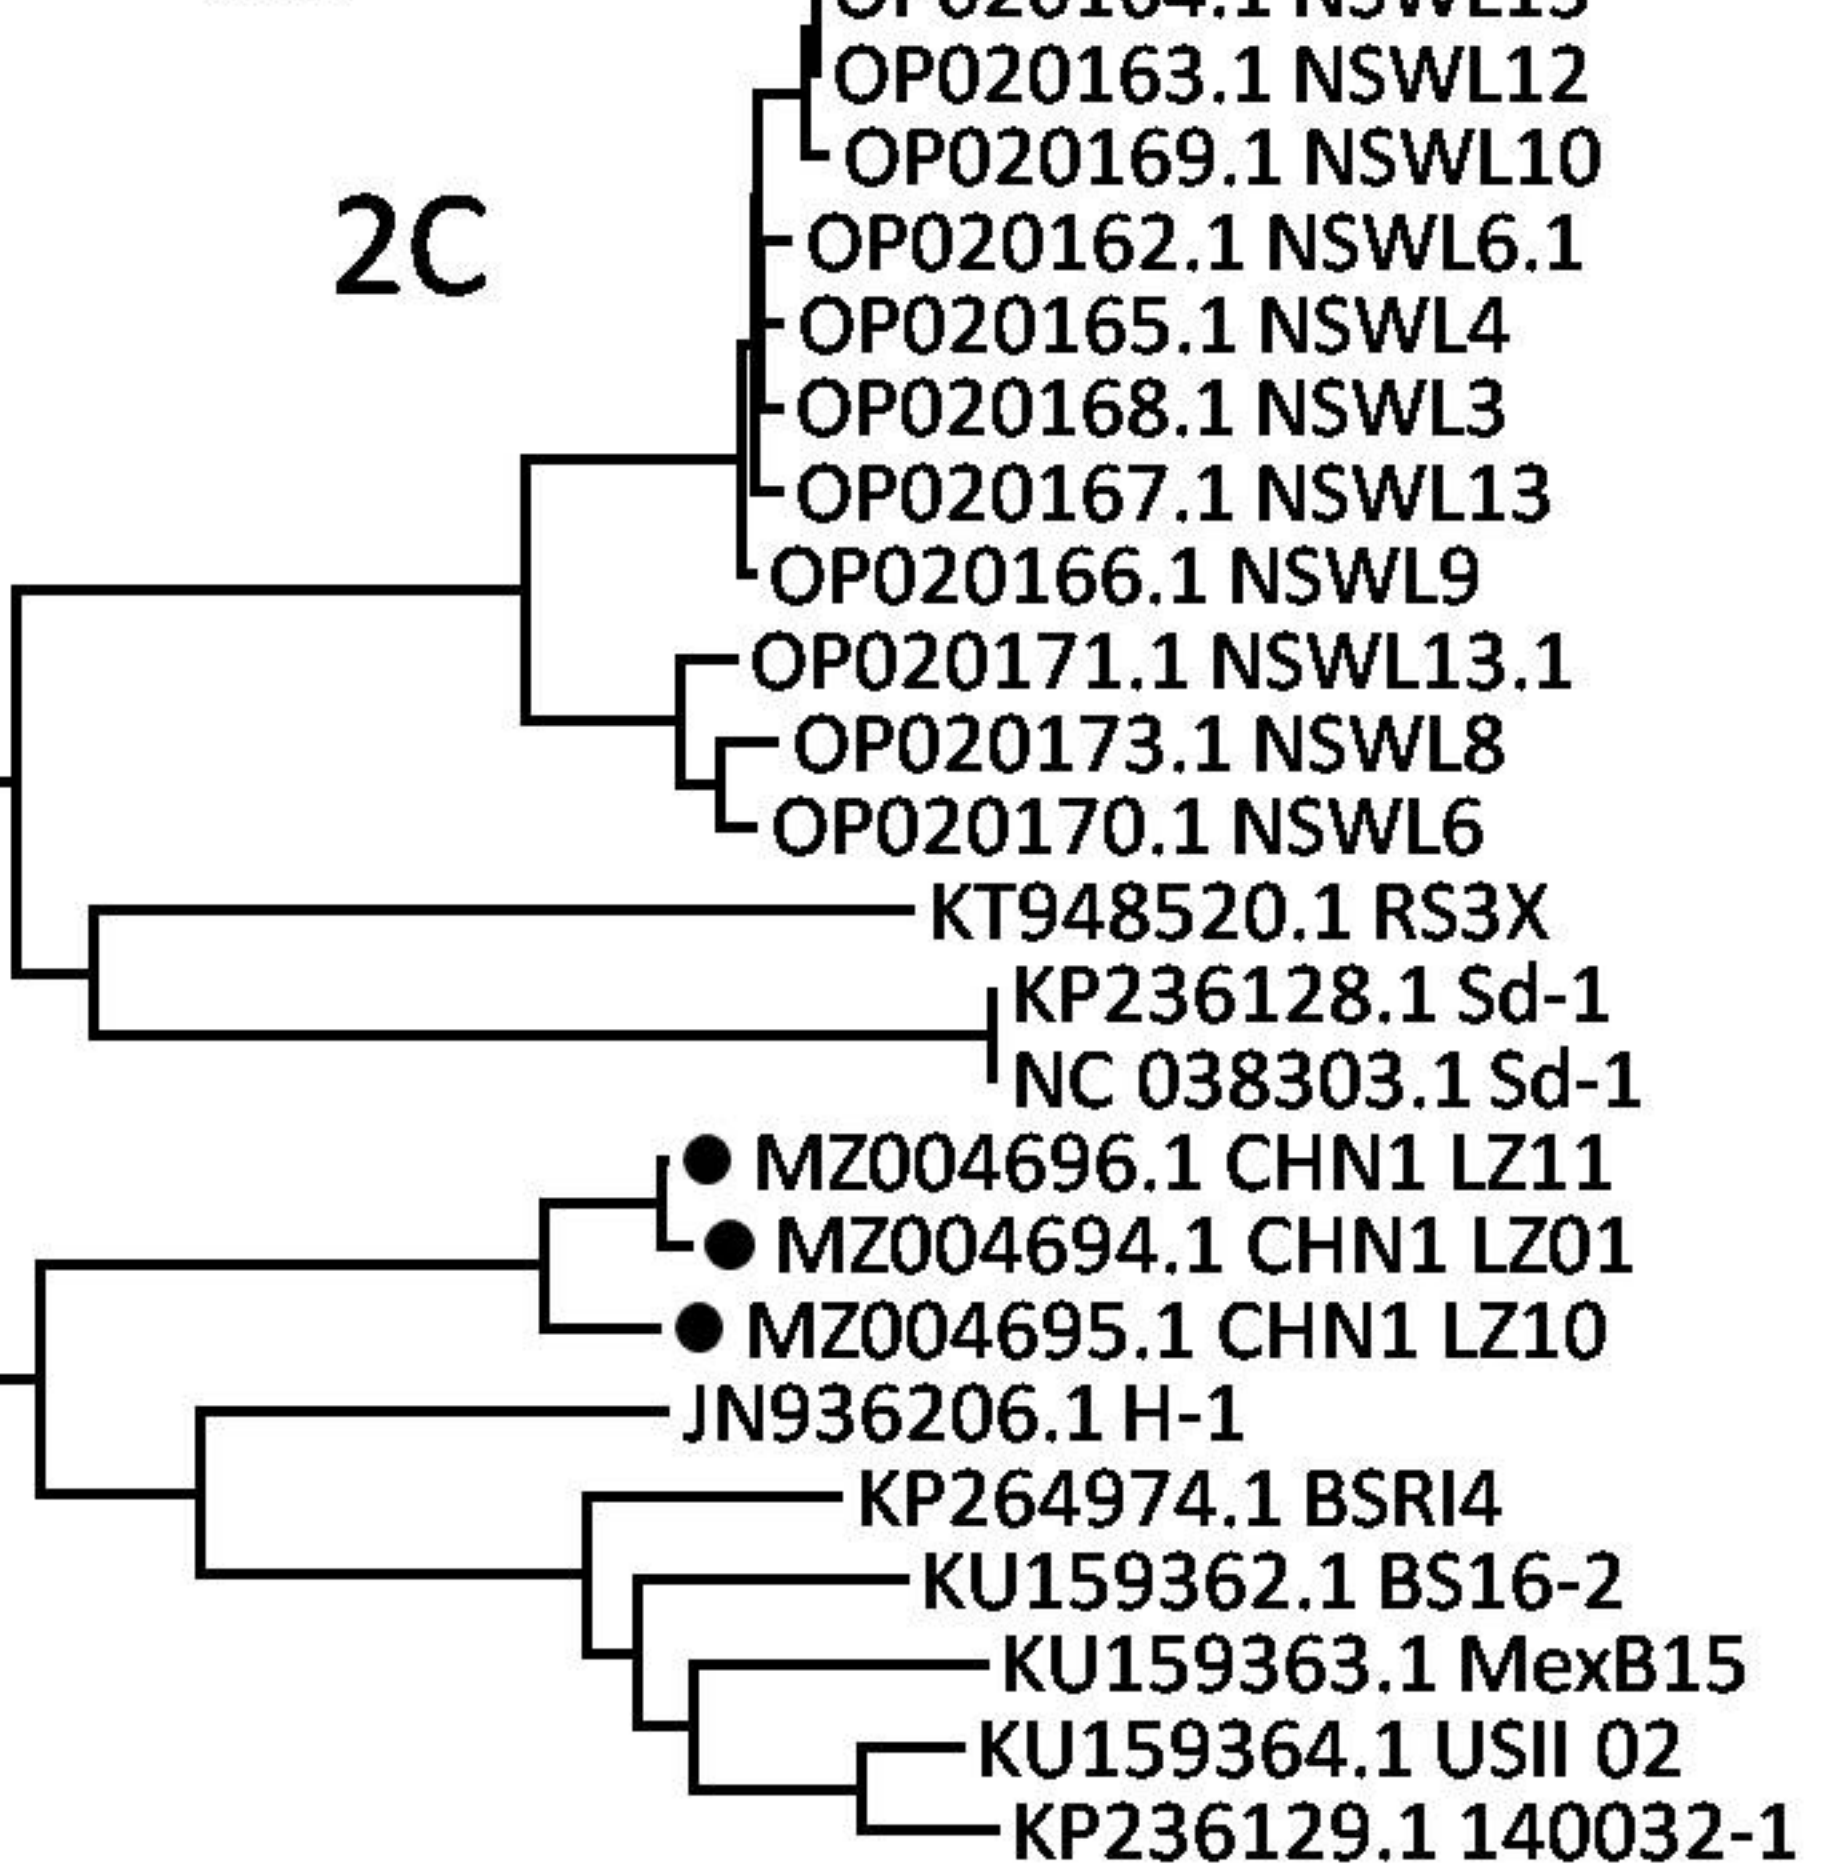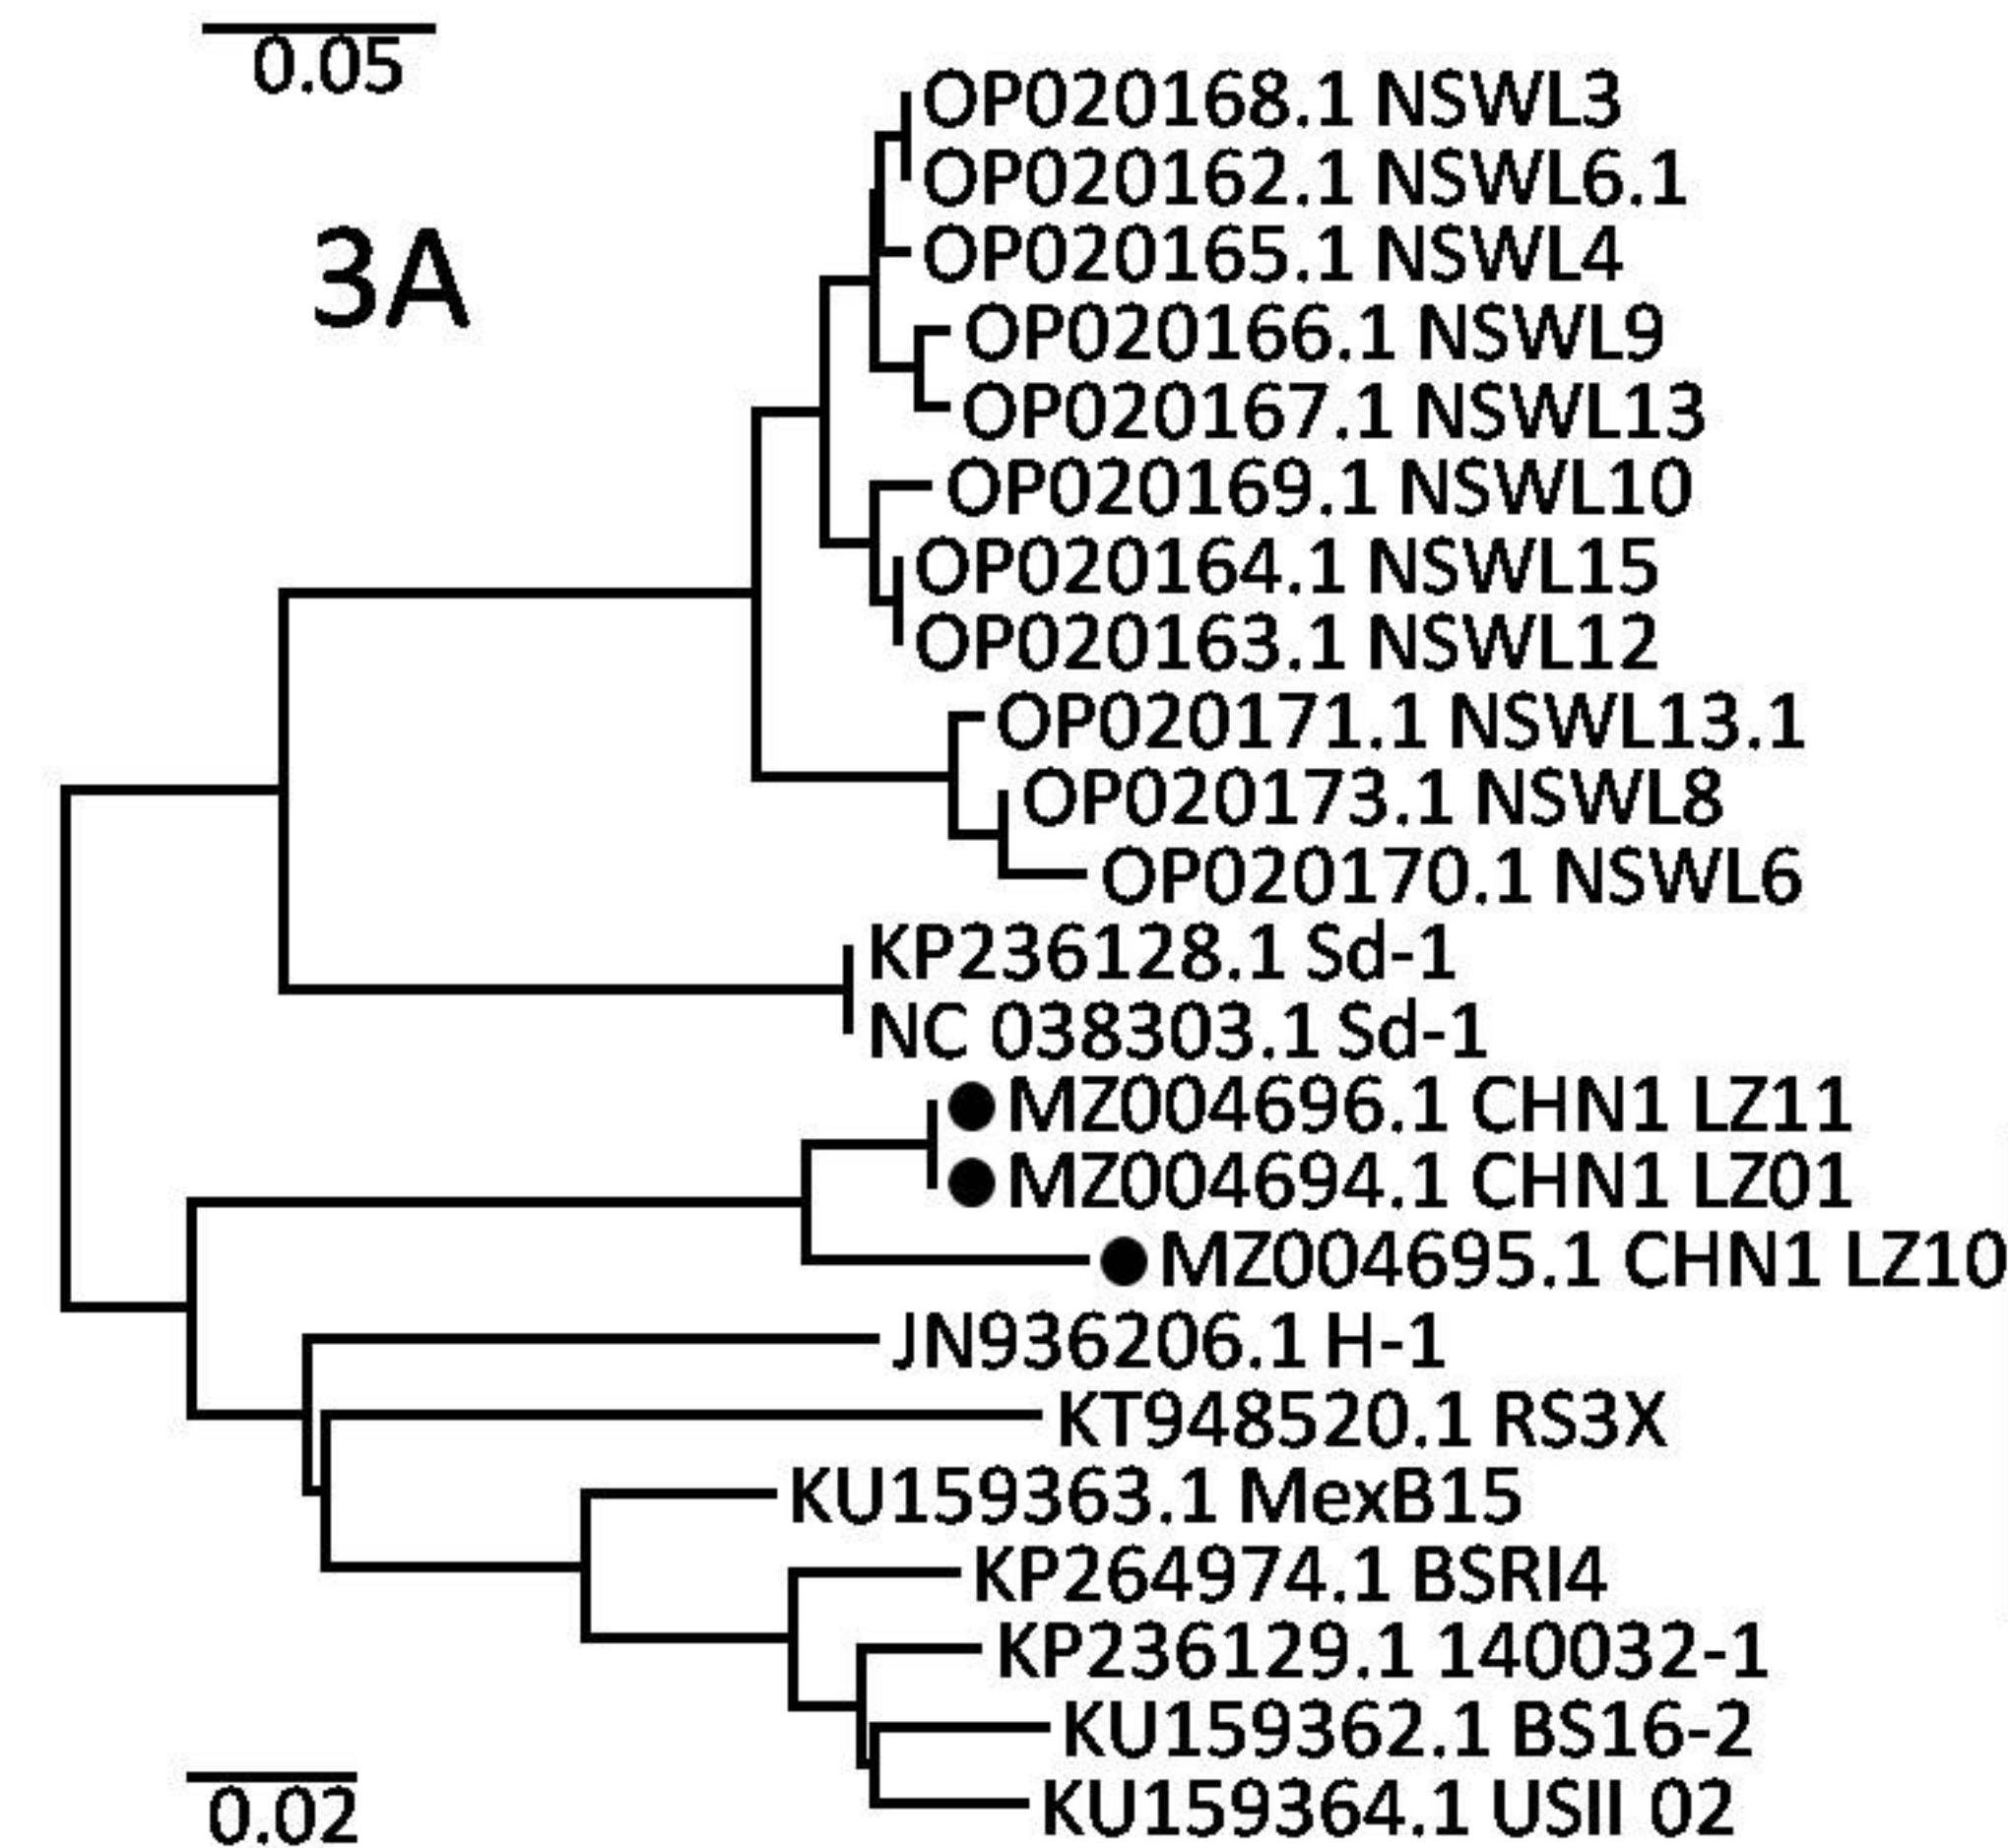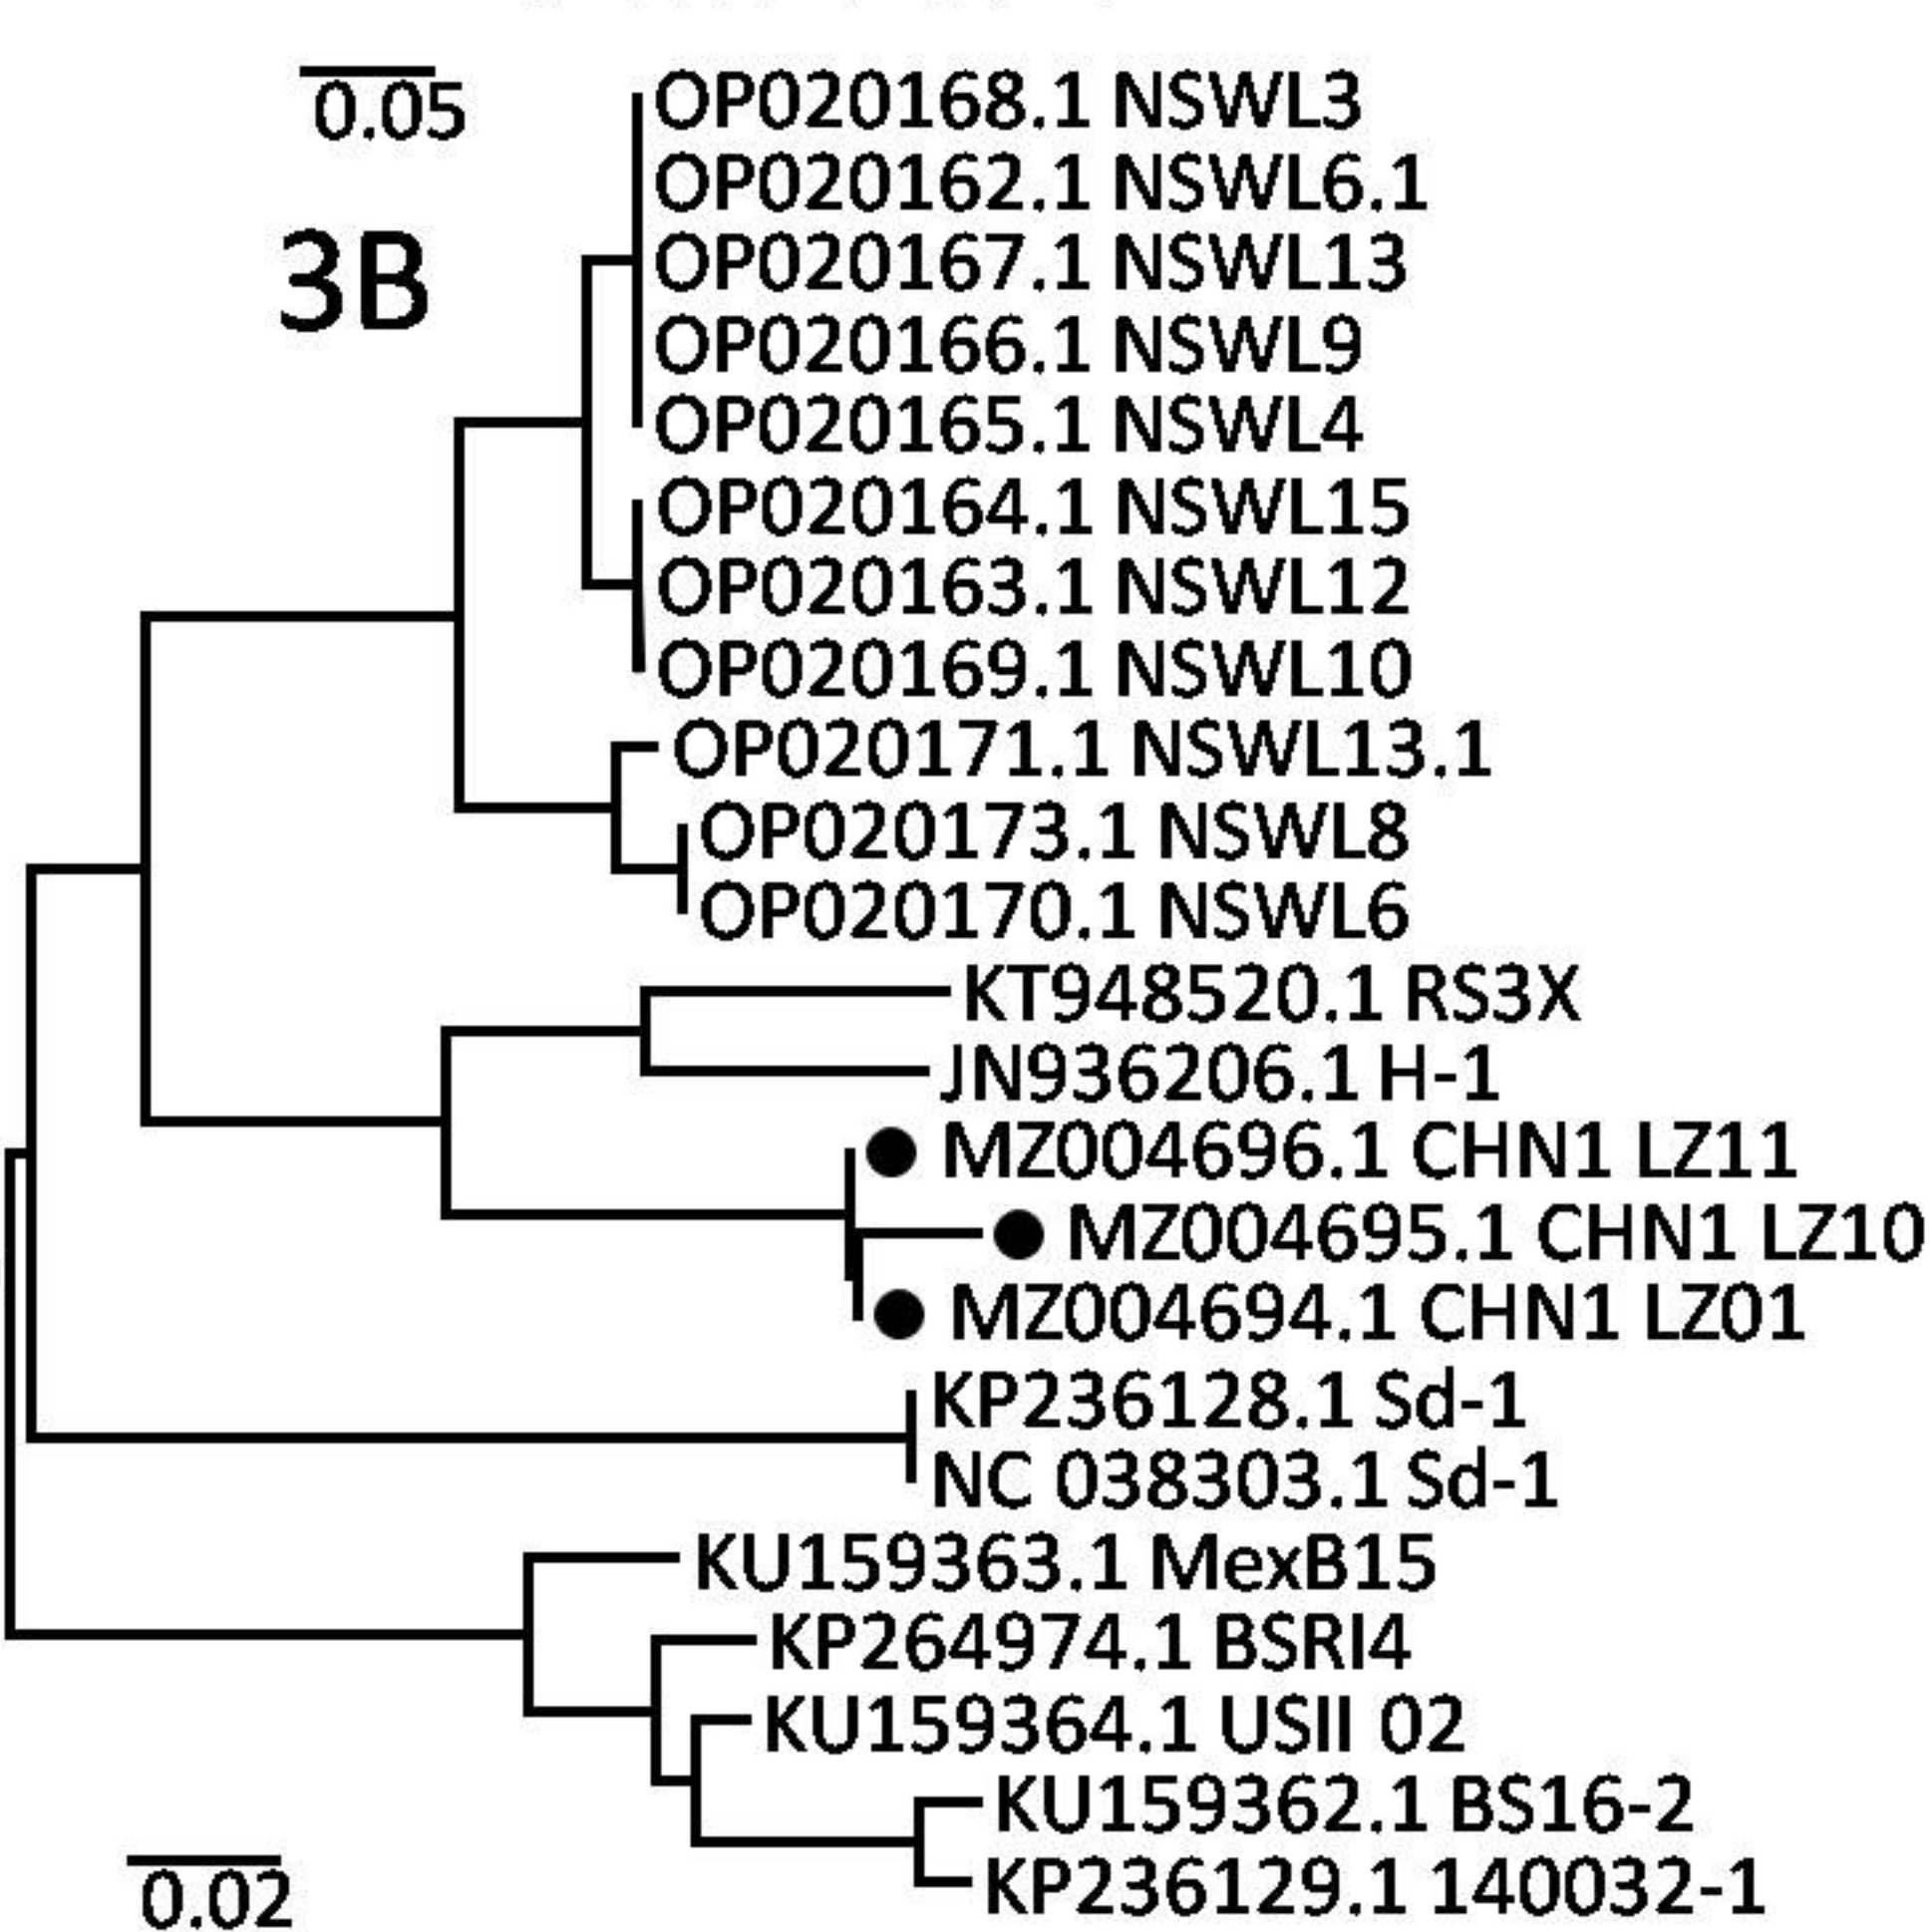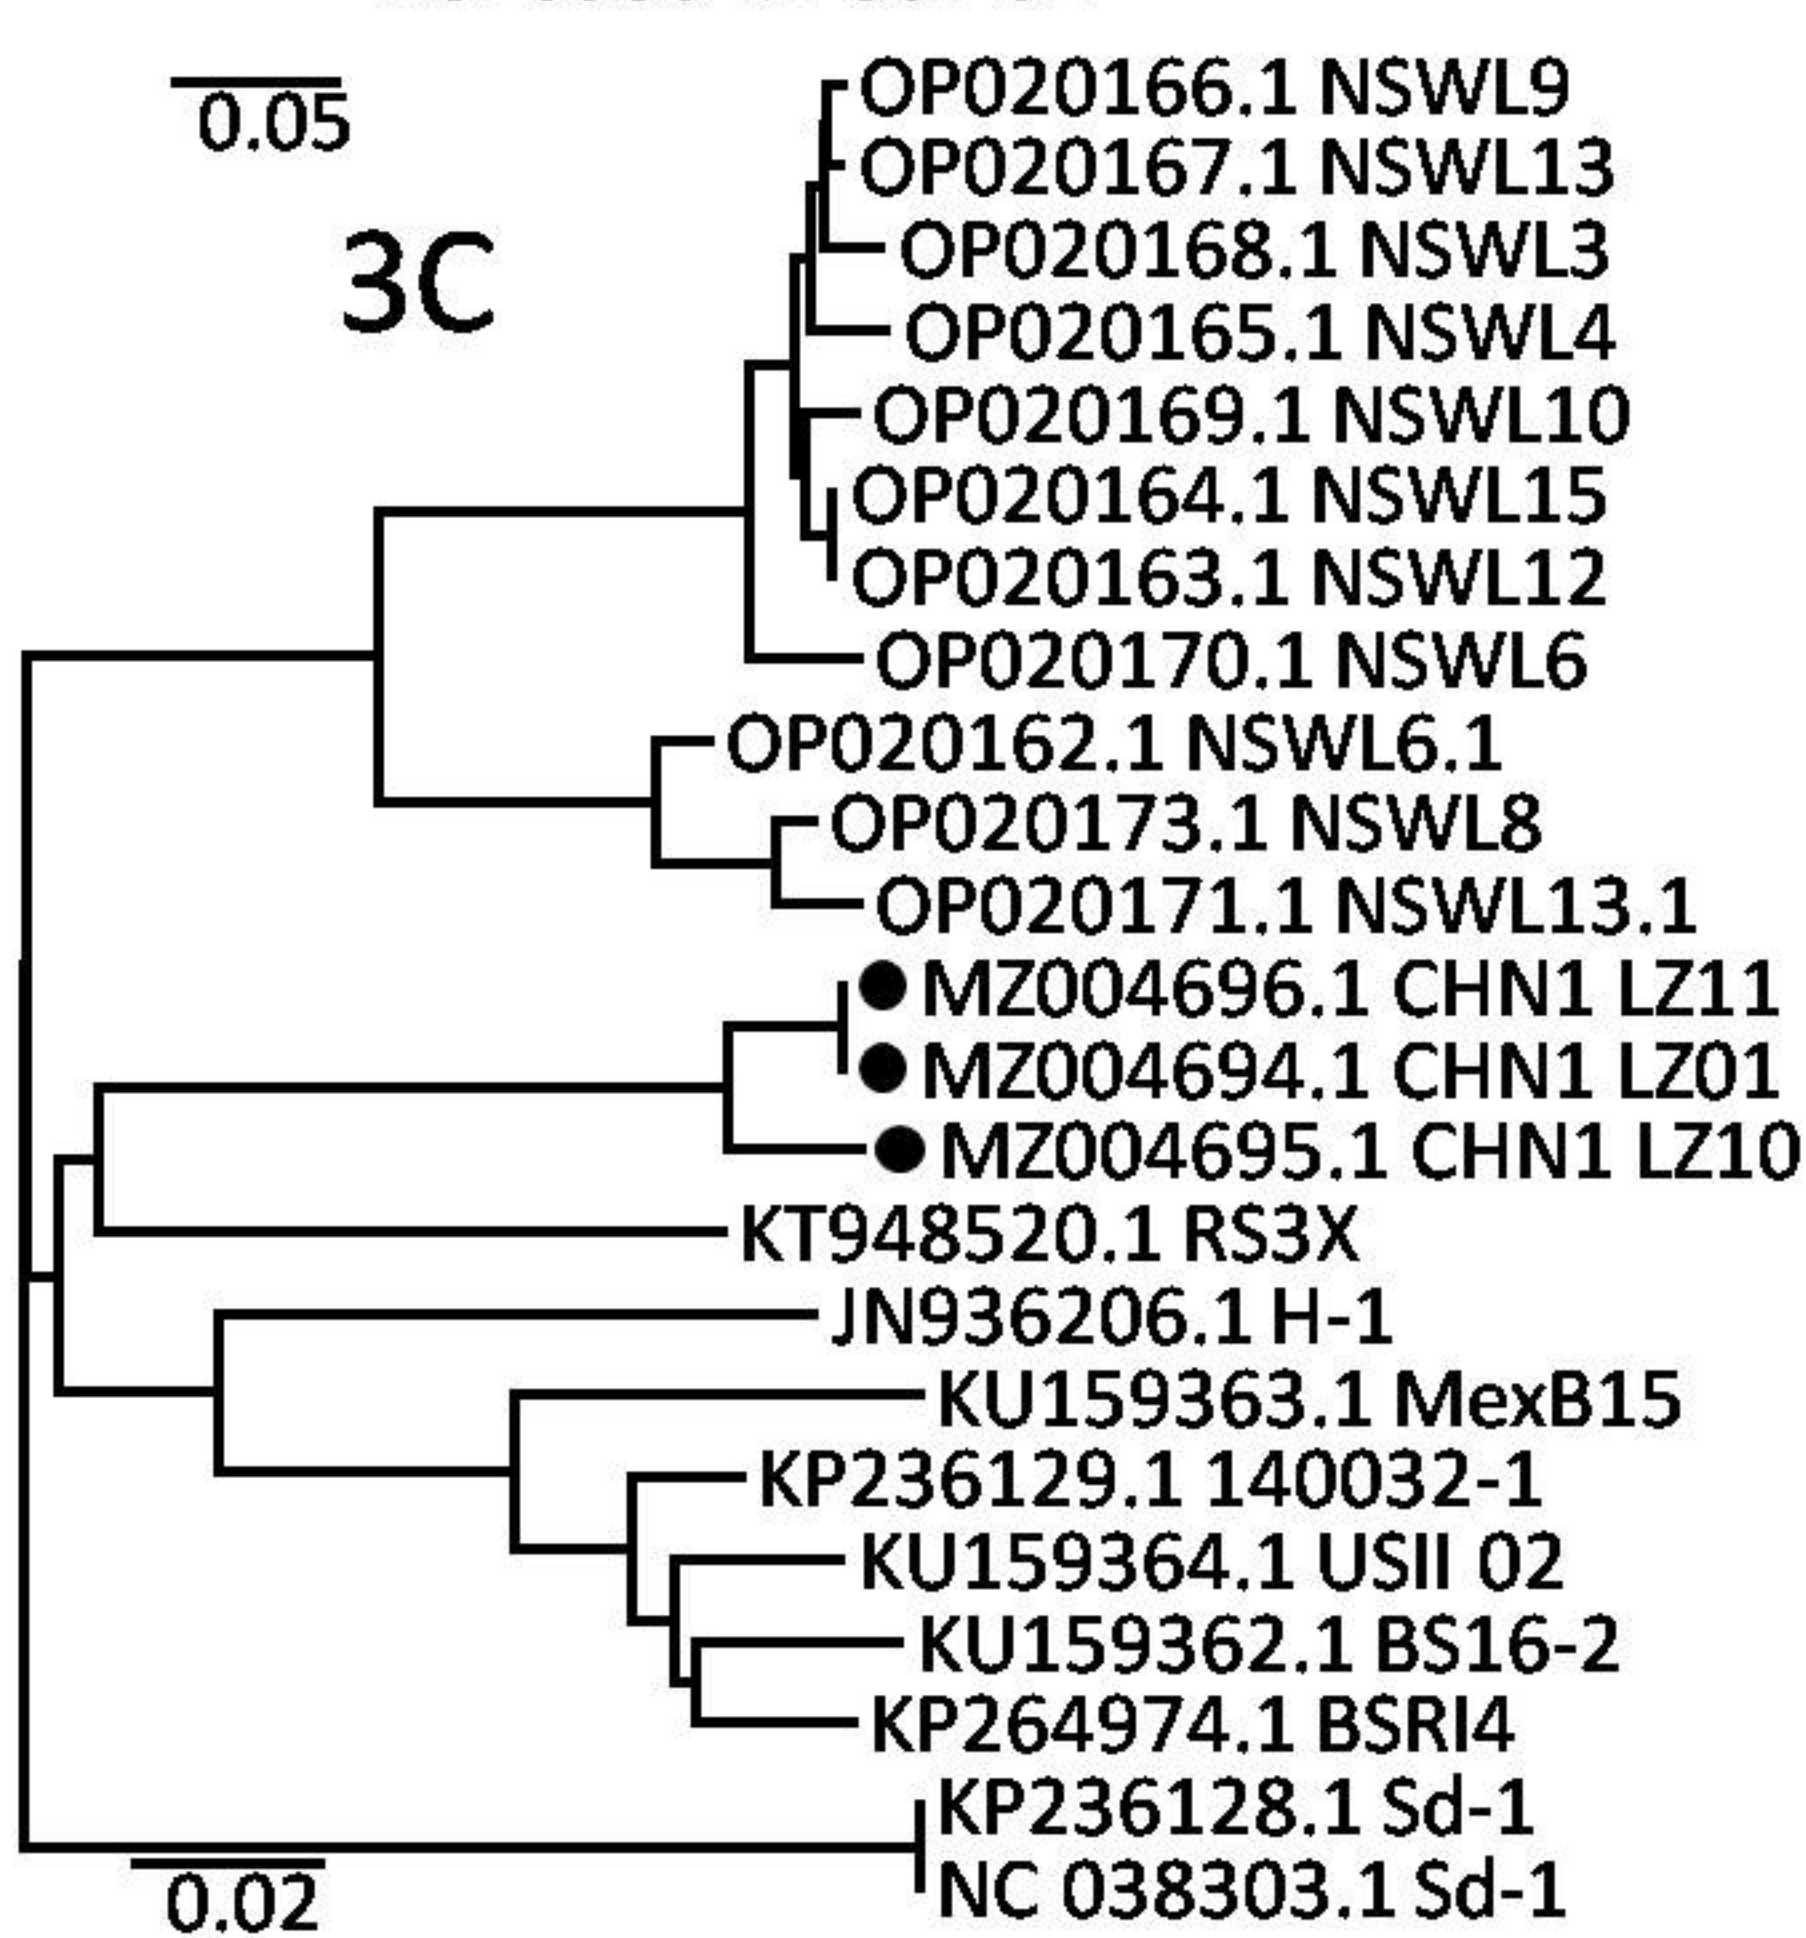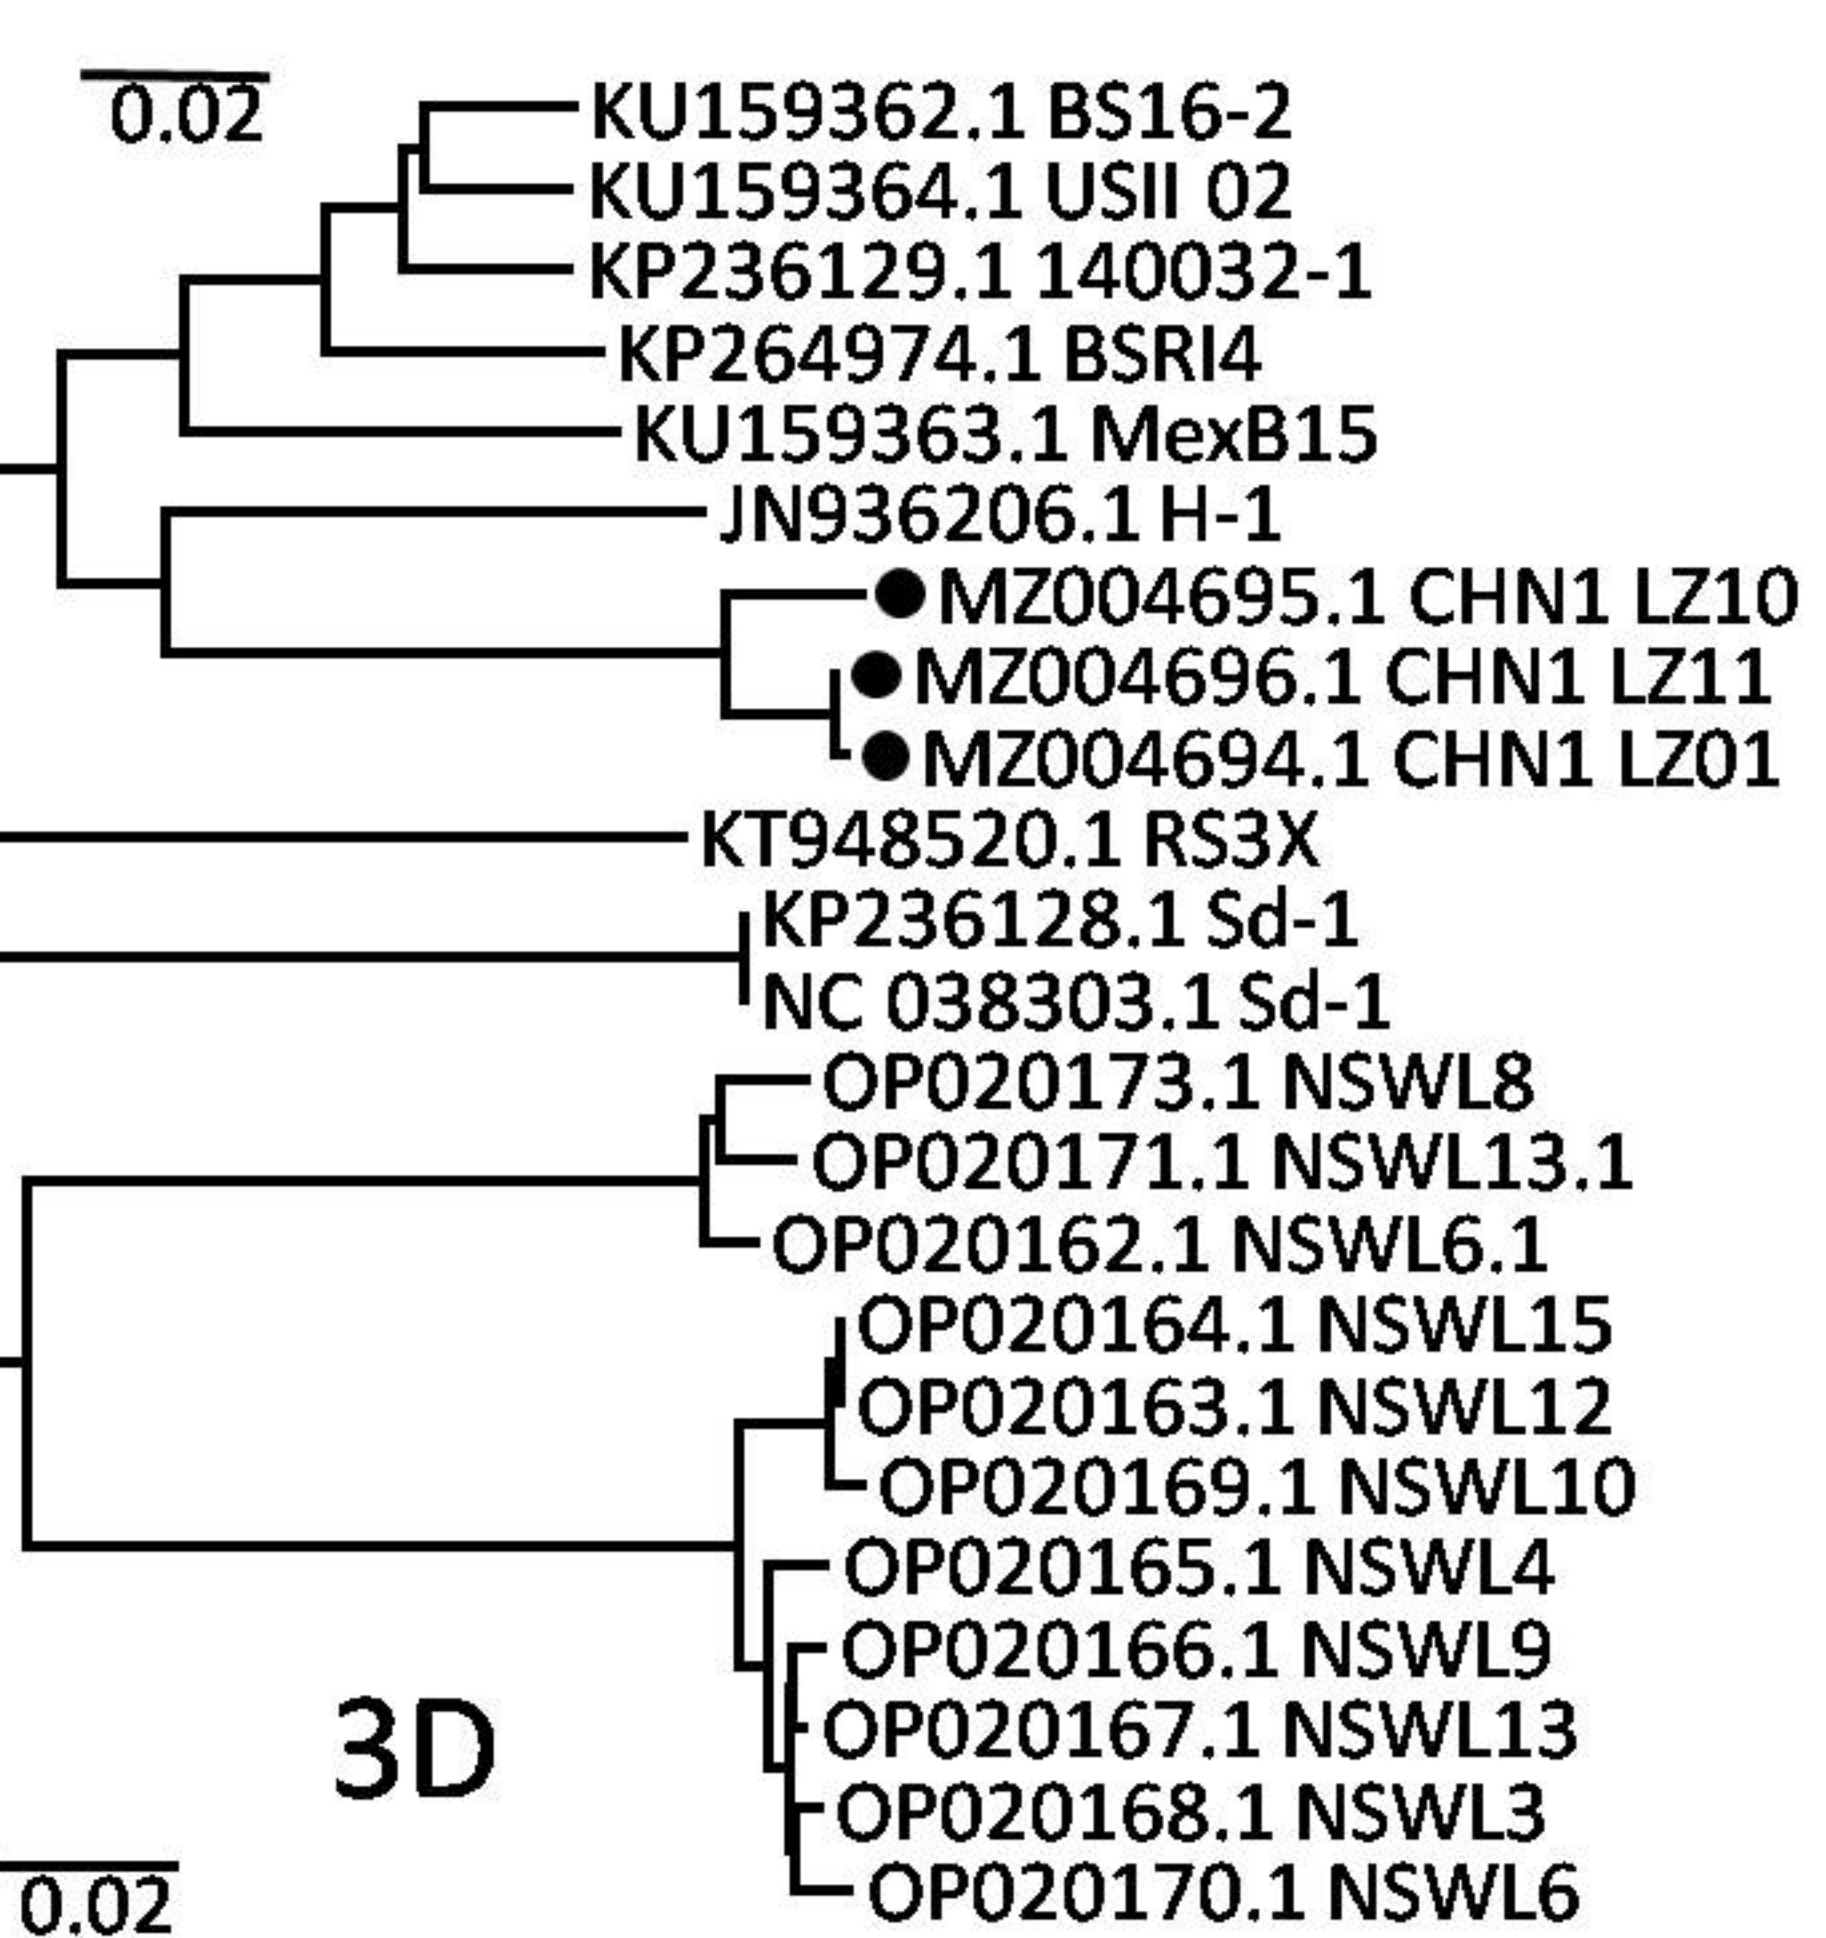



Phylogenetic trees for each gene of BRBV

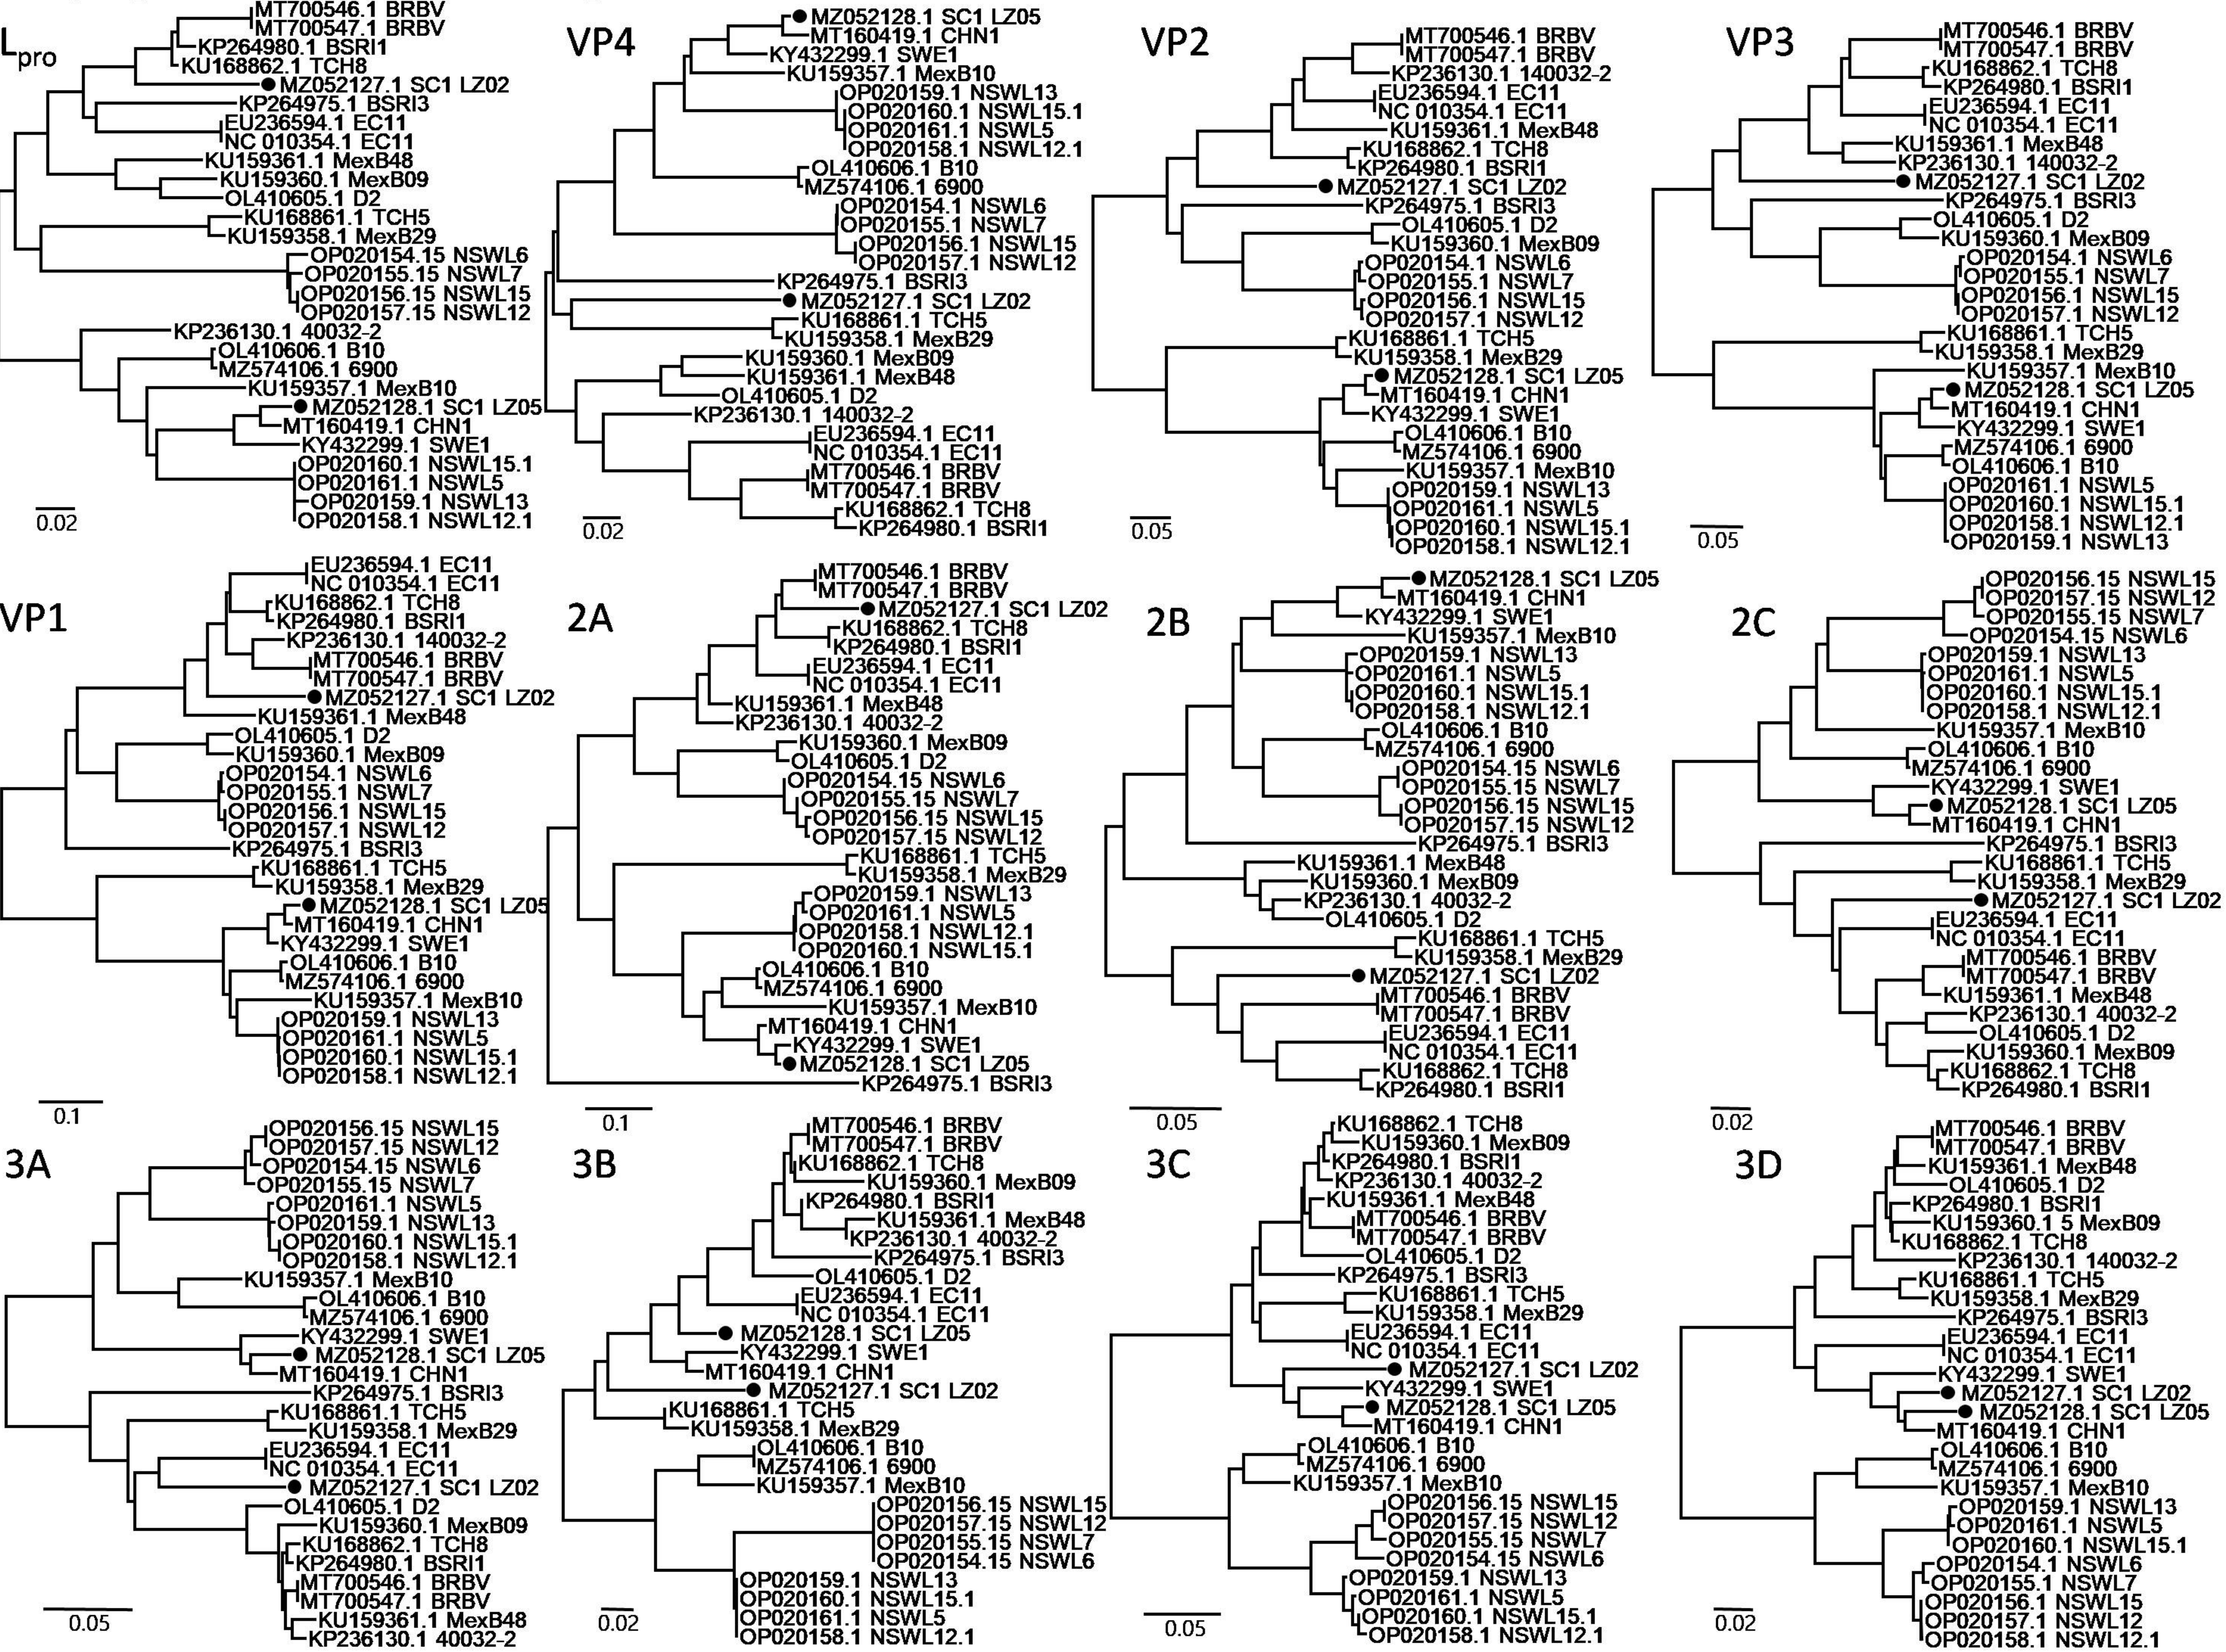



|                           |   |    |    |     |     |     |     |     |     |     |     |     |     |     |     |   |
|---------------------------|---|----|----|-----|-----|-----|-----|-----|-----|-----|-----|-----|-----|-----|-----|---|
|                           |   | 10 | 20 | 30  | 40  | 50  | 60  | 70  | 80  | 90  | 100 | 110 | 120 | 130 |     |   |
| MZ004695.1_CHN1_L210      | M | T  | T  | --- | --- | --- | --- | --- | --- | --- | --- | --- | --- | --- | --- |   |
| MZ004696.1_CHN1_L211      | M | T  | T  | --- | --- | --- | --- | --- | --- | --- | --- | --- | --- | --- | --- |   |
| MZ004694.1_CHN1_L201      | M | T  | T  | --- | --- | --- | --- | --- | --- | --- | --- | --- | --- | --- | --- |   |
| KP236128.1_Sd-1           | M | K  | T  | T   | --- | --- | --- | --- | --- | --- | --- | --- | --- | --- | --- |   |
| NC_038303.1_Sd-1          | M | K  | T  | T   | --- | --- | --- | --- | --- | --- | --- | --- | --- | --- | --- |   |
| KT948520.1_RS3X           | M | T  | T  | --- | --- | --- | --- | --- | --- | --- | --- | --- | --- | --- | --- |   |
| JN936206.1_H-1            | M | K  | T  | T   | --- | --- | --- | --- | --- | --- | --- | --- | --- | --- | --- |   |
| KUI159362.1_BS16-2        | M | T  | T  | --- | --- | --- | --- | --- | --- | --- | --- | --- | --- | --- | --- |   |
| KP264974.1_BSRI4          | M | T  | T  | --- | --- | --- | --- | --- | --- | --- | --- | --- | --- | --- | --- |   |
| KUI159364.1_USI1_02       | M | T  | T  | --- | --- | --- | --- | --- | --- | --- | --- | --- | --- | --- | --- |   |
| KP236129.1_140032-1       | M | T  | T  | --- | --- | --- | --- | --- | --- | --- | --- | --- | --- | --- | --- |   |
| KUI159363.1_MexB15        | M | T  | T  | --- | --- | --- | --- | --- | --- | --- | --- | --- | --- | --- | --- |   |
| OP020164.1_BRAV3_NSWL15   | M | K  | T  | T   | --- | --- | --- | --- | --- | --- | --- | --- | --- | --- | --- |   |
| OP020165.1_BRAV3_NSWL4    | M | K  | T  | T   | --- | --- | --- | --- | --- | --- | --- | --- | --- | --- | --- |   |
| OP020166.1_BRAV3_NSWL9    | M | K  | T  | T   | --- | --- | --- | --- | --- | --- | --- | --- | --- | --- | --- |   |
| OP020167.1_BRAV3_NSWL13   | M | K  | T  | T   | --- | --- | --- | --- | --- | --- | --- | --- | --- | --- | --- |   |
| OP020168.1_BRAV3_NSWL3    | M | K  | T  | T   | --- | --- | --- | --- | --- | --- | --- | --- | --- | --- | --- |   |
| OP020173.1_BRAV3_NSWL8    | M | K  | T  | T   | --- | --- | --- | --- | --- | --- | --- | --- | --- | --- | --- |   |
| OP020163.1_BRAV3_NSWL12   | M | K  | T  | T   | --- | --- | --- | --- | --- | --- | --- | --- | --- | --- | --- |   |
| OP020169.1_BRAV3_NSWL10   | M | K  | T  | T   | --- | --- | --- | --- | --- | --- | --- | --- | --- | --- | --- |   |
| OP020170.1_BRAV3_NSWL6    | M | K  | T  | T   | --- | --- | --- | --- | --- | --- | --- | --- | --- | --- | --- |   |
| OP020162.1_BRAV3_NSWL6.1  | M | K  | T  | T   | --- | --- | --- | --- | --- | --- | --- | --- | --- | --- | --- |   |
| OP020171.1_BRAV3_NSWL13.1 | M | K  | T  | T   | --- | --- | --- | --- | --- | --- | --- | --- | --- | --- | --- |   |
|                           |   |    |    |     |     |     |     |     |     |     |     |     |     |     |     |   |
| MZ004695.1_CHN1_L210      | E | H  | A  | V   | F   | F   | R   | S   | E   | D   | G   | T   | V   | C   | V   | D |
| MZ004696.1_CHN1_L211      | E | H  | A  | V   | F   | F   | R   | S   | E   | D   | G   | T   | V   | C   | V   | D |
| MZ004694.1_CHN1_L201      | E | H  | A  | V   | F   | F   | R   | S   | E   | D   | G   | T   | V   | C   | V   | D |
| KP236128.1_Sd-1           | E | H  | A  | V   | F   | F   | R   | S   | E   | D   | G   | T   | V   | C   | V   | D |
| NC_038303.1_Sd-1          | E | H  | A  | V   | F   | F   | R   | S   | E   | D   | G   | T   | V   | C   | V   | D |
| KT948520.1_RS3X           | E | H  | A  | V   | F   | F   | R   | S   | E   | D   | G   | T   | V   | C   | V   | D |
| JN936206.1_H-1            | E | H  | A  | V   | F   | F   | R   | S   | E   | D   | G   | T   | V   | C   | V   | D |
| KUI159362.1_BS16-2        | E | H  | A  | V   | F   | F   | R   | S   | E   | D   | G   | T   | V   | C   | V   | D |
| KP264974.1_BSRI4          | E | H  | A  | V   | F   | F   | R   | S   | E   | D   | G   | T   | V   | C   | V   | D |
| KUI159364.1_USI1_02       | E | H  | A  | V   | F   | F   | R   | S   | E   | D   | G   | T   | V   | C   | V   | D |
| KP236129.1_140032-1       | E | H  | A  | V   | F   | F   | R   | S   | E   | D   | G   | T   | V   | C   | V   | D |
| KUI159363.1_MexB15        | E | H  | A  | V   | F   | F   | R   | S   | E   | D   | G   | T   | V   | C   | V   | D |
| OP020164.1_BRAV3_NSWL15   | E | H  | A  | V   | F   | F   | R   | S   | E   | D   | G   | T   | V   | C   | V   | D |
| OP020165.1_BRAV3_NSWL4    | E | H  | A  | V   | F   | F   | R   | S   | E   | D   | G   | T   | V   | C   | V   | D |
| OP020166.1_BRAV3_NSWL9    | E | H  | A  | V   | F   | F   | R   | S   | E   | D   | G   | T   | V   | C   | V   | D |
| OP020167.1_BRAV3_NSWL13   | E | H  | A  | V   | F   | F   | R   | S   | E   | D   | G   | T   | V   | C   | V   | D |
| OP020168.1_BRAV3_NSWL3    | E | H  | A  | V   | F   | F   | R   | S   | E   | D   | G   | T   | V   | C   | V   | D |
| OP020173.1_BRAV3_NSWL8    | E | H  | A  | V   | F   | F   | R   | S   | E   | D   | G   | T   | V   | C   | V   | D |
| OP020163.1_BRAV3_NSWL12   | E | H  | A  | V   | F   | F   | R   | S   | E   | D   | G   | T   | V   | C   | V   | D |
| OP020169.1_BRAV3_NSWL10   | E | H  | A  | V   | F   | F   | R   | S   | E   | D   | G   | T   | V   | C   | V   | D |
| OP020170.1_BRAV3_NSWL6    | E | H  | A  | V   | F   | F   | R   | S   | E   | D   | G   | T   | V   | C   | V   | D |
| OP020162.1_BRAV3_NSWL6.1  | E | H  | A  | V   | F   | F   | R   | S   | E   | D   | G   | T   | V   | C   | V   | D |
| OP020171.1_BRAV3_NSWL13.1 | E | H  | A  | V   | F   | F   | R   | S   | E   | D   | G   | T   | V   | C   | V   | D |
|                           |   |    |    |     |     |     |     |     |     |     |     |     |     |     |     |   |
| MZ004695.1_CHN1_L210      | L | T  | N  | L   | A   | S   | N   | V   | L   | P   | A   | A   | I   | G   | L   | L |
| MZ004696.1_CHN1_L211      | L | T  | N  | L   | A   | S   | N   | V   | L   | P   | A   | A   | I   | G   | L   | L |
| MZ004694.1_CHN1_L201      | L | T  | N  | L   | A   | S   | N   | V   | L   | P   | A   | A   | I   | G   | L   | L |
| KP236128.1_Sd-1           | L | T  | N  | L   | A   | S   | N   | V   | L   | P   | A   | A   | I   | G   | L   | L |
| NC_038303.1_Sd-1          | L | T  | N  | L   | A   | S   | N   | V   | L   | P   | A   | A   | I   | G   | L   | L |
| KT948520.1_RS3X           | L | T  | N  | L   | A   | S   | N   | V   | L   | P   | A   | A   | I   | G   | L   | L |
| JN936206.1_H-1            | L | T  | N  | L   | A   | S   | N   | V   | L   | P   | A   | A   | I   | G   | L   | L |
| KUI159362.1_BS16-2        | L | T  | N  | L   | A   | S   | N   | V   | L   | P   | A   | A   | I   | G   | L   | L |
| KP264974.1_BSRI4          | L | T  | N  | L   | A   | S   | N   | V   | L   | P   | A   | A   | I   | G   | L   | L |
| KUI159364.1_USI1_02       | L | T  | N  | L   | A   | S   | N   | V   | L   | P   | A   | A   | I   | G   | L   | L |
| KP236129.1_140032-1       | L | T  | N  | L   | A   | S   | N   | V   | L   | P   | A   | A   | I   | G   | L   | L |
| KUI159363.1_MexB15        | L | T  | N  | L   | A   | S   | N   | V   | L   | P   | A   | A   | I   | G   | L   | L |
| OP020164.1_BRAV3_NSWL15   | L | T  | N  | L   | A   | S   | N   | V   | L   | P   | A   | A   | I   | G   | L   | L |
| OP020165.1_BRAV3_NSWL4    | L | T  | N  | L   | A   | S   | N   | V   | L   | P   | A   | A   | I   | G   | L   | L |
| OP020166.1_BRAV3_NSWL9    | L | T  | N  | L   | A   | S   | N   | V   | L   | P   | A   | A   | I   | G   | L   | L |
| OP020167.1_BRAV3_NSWL13   | L | T  | N  | L   | A   | S   | N   | V   | L   | P   | A   | A   | I   | G   | L   | L |
| OP020168.1_BRAV3_NSWL3    | L | T  | N  | L   | A   | S   | N   | V   | L   | P   | A   | A   | I   | G   | L   | L |
| OP020173.1_BRAV3_NSWL8    | L | T  | N  | L   | A   | S   | N   | V   | L   | P   | A   | A   | I   | G   | L   | L |
| OP020163.1_BRAV3_NSWL12   | L | T  | N  | L   | A   | S   | N   | V   | L   | P   | A   | A   | I   | G   | L   | L |
| OP020169.1_BRAV3_NSWL10   | L | T  | N  | L   | A   | S   | N   | V   | L   | P   | A   | A   | I   | G   | L   | L |
| OP020170.1_BRAV3_NSWL6    | L | T  | N  | L   | A   | S   | N   | V   | L   | P   | A   | A   | I   | G   | L   | L |
| OP020162.1_BRAV3_NSWL6.1  | L | T  | N  | L   | A   | S   | N   | V   | L   | P   | A   | A   | I   | G   | L   | L |
| OP020171.1_BRAV3_NSWL13.1 | L | T  | N  | L   | A   | S   | N   | V   | L   | P   | A   | A   | I   | G   | L   | L |
|                           |   |    |    |     |     |     |     |     |     |     |     |     |     |     |     |   |
| MZ004695.1_CHN1_L210      | A | Q  | G  | T   | L   | S   | H   | G   | G   | M   | L   | V   | A   | M   | V   | P |
| MZ004696.1_CHN1_L211      | A | Q  | G  | T   | L   | S   | H   | G   | G   | M   | L   | V   | A   | M   | V   | P |
| MZ004694.1_CHN1_L201      | A | Q  | G  | T   | L   | S   | H   | G   | G   | M   | L   | V   | A   | M   | V   | P |
| KP236128.1_Sd-1           | A | Q  | G  | T   | L   | S   | H   | G   | G   | M   | L   | V   | A   | M   | V   | P |
| NC_038303.1_Sd-1          | A | Q  | G  | T   | L   | S   | H   | G   | G   | M   | L   | V   | A   | M   | V   | P |
| KT948520.1_RS3X           | A | Q  | G  | T   | L   | S   | H   | G   | G   | M   | L   | V   | A   | M   | V   | P |
| JN936206.1_H-1            | A | Q  | G  | T   | L   | S   | H   | G   | G   | M   | L   | V   | A   | M   | V   | P |
| KUI159362.1_BS16-2        | A | Q  | G  | T   | L   | S   | H   | G   | G   | M   | L   | V   | A   | M   | V   | P |
| KP264974.1_BSRI4          | A | Q  | G  | T   | L   | S   | H   | G   | G   | M   | L   | V   | A   | M   | V   | P |
| KUI159364.1_USI1_02       | A | Q  | G  | T   | L   | S   | H   | G   | G   | M   | L   | V   | A   | M   | V   | P |
| KP236129.1_140032-1       | A | Q  | G  | T   | L   | S   | H   | G   | G   | M   | L   | V   | A   | M   | V   | P |
| KUI159363.1_MexB15        | A | Q  | G  | T   | L   | S   | H   | G   | G   | M   | L   | V   | A   | M   | V   | P |
| OP020164.1_BRAV3_NSWL15   | A | Q  | G  | T   | L   | S   | H   | G   | G   | M   | L   | V   | A   | M   | V   | P |
| OP020165.1_BRAV3_NSWL4    | A | Q  | G  | T   | L   | S   | H   | G   | G   | M   | L   | V   | A   | M   | V   | P |
| OP020166.1_BRAV3_NSWL9    | A | Q  | G  | T   | L   | S   | H   | G   | G   | M   | L   | V   | A   | M   | V   | P |
| OP020167.1_BRAV3_NSWL13   | A | Q  | G  | T   | L   | S   | H   | G   | G   | M   | L   | V   | A   | M   | V   | P |
| OP020168.1_BRAV3_NSWL3    | A | Q  | G  | T   | L   | S   | H   | G   | G   | M   | L   | V   | A   | M   | V   | P |
| OP020173.1_BRAV3_NSWL8    | A | Q  | G  | T   | L   | S   | H   | G   | G   | M   | L   | V   | A   | M   | V   | P |
| OP020163.1_BRAV3_NSWL12   | A | Q  | G  | T   | L   | S   | H   | G   | G   | M   | L   | V   | A   | M   | V   | P |
| OP020169.1_BRAV3_NSWL10   | A | Q  | G  | T   | L   | S   | H   | G   | G   | M   | L   | V   | A   | M   | V   | P |
| OP020170.1_BRAV3_NSWL6    | A | Q  | G  | T   | L   | S   | H   | G   | G   | M   | L   | V   | A   | M   | V   | P |
| OP020162.1_BRAV3_NSWL6.1  | A | Q  | G  | T   | L   | S   | H   | G   | G   | M   | L   | V   | A   | M   | V   | P |
| OP020171.1_BRAV3_NSWL13.1 | A | Q  | G  | T   | L   | S   | H   | G   | G   | M   | L   | V   | A   | M   | V   | P |
|                           |   |    |    |     |     |     |     |     |     |     |     |     |     |     |     |   |
| MZ004695.1_CHN1_L210      | A | P  | I  | T   | A   | D   | P   | V   | C   | G   | G   | V   | N   | P   | R   | Q |
| MZ004696.1_CHN1_L211      | A | P  | I  | T   | A   | D   | P   | V   | C   | G   | G   | V   | N   | P   | R   | Q |
| MZ004694.1_CHN1_L201      | A | P  | I  | T   | A   | D   | P   | V   | C   | G   | G   | V   | N   | P   | R   | Q |
| KP236128.1_Sd-1           | A | P  | I  | T   | A   | D   | P   | V   | C   | G   | G   | V   | N   | P   | R   | Q |
| NC_038303.1_Sd-1          | A | P  | I  | T   | A   | D   | P   | V   | C   | G   | G   | V   | N   | P   | R   | Q |
| KT948520.1_RS3X           | A | P  | I  | T   | A   | D   | P   | V   | C   | G   | G   | V   | N   | P   | R   | Q |
| JN936206.1_H-1            | A | P  | I  | T   | A   | D   | P   | V   | C   | G   | G   | V   | N   | P   | R   | Q |
| KUI159362.1_BS16-2        | A | P  | I  | T   | A   | D   | P   | V   | C   | G   | G   | V   | N   | P   | R   | Q |
| KP264974.1_BSRI4          | A | P  | I  | T   | A   | D   | P   | V   | C   | G   | G   | V   | N   | P   | R   | Q |
| KUI159364.1_USI1_02       | A | P  | I  | T   | A   | D   | P   | V   | C   | G   | G   | V   | N   | P   | R   | Q |
| KP236129.1_140032-1       | A | P  | I  | T   | A   | D   | P   | V   | C   | G   | G   | V   | N   | P   | R   | Q |
| KUI159363.1_MexB15        | A | P  | I  | T   | A   | D   | P   | V   | C   | G   | G   | V   | N   | P   | R   | Q |
| OP020164.1_BRAV3_NSWL15   | A | P  | I  | T   | A   | D   | P   | V   | C   | G   | G   | V   | N   | P   | R   | Q |
| OP020165.1_BRAV3_NSWL4    | A | P  | I  | T   | A   | D   | P   | V   | C   | G   | G   | V   | N   | P   | R   | Q |
| OP020166.1_BRAV3_NSWL9    | A | P  | I  | T   | A   | D   | P   | V   | C   | G   | G   | V   | N   | P   | R   | Q |
| OP020167.1_BRAV3_NSWL13   | A | P  | I  | T   | A   | D   | P   | V   | C   | G   | G   | V   | N   | P   | R   | Q |
| OP020168.1_BRAV3_NSWL3    | A | P  | I  | T   | A   | D   | P   | V   | C   | G   | G   | V   | N   | P   | R   | Q |
| OP020173.1_BRAV3_NSWL8    | A | P  | I  | T   | A   | D   | P   | V   | C   | G   | G   | V   | N   | P   | R   | Q |
| OP020163.1_BRAV3_NSWL12   | A | P  | I  | T   | A   | D   | P   | V   | C   | G   | G   | V   | N   | P   | R   | Q |
| OP020169.1_BRAV3_NSWL10   | A | P  | I  | T   | A   | D   | P   | V   | C   | G   | G   | V   | N   | P   | R   | Q |
| OP020170.1_BRAV3_NSWL6    | A | P  | I  | T   | A   | D   | P   | V   | C   | G   | G   | V   | N   | P   | R   | Q |
| OP020162.1_BRAV3_NSWL6.1  | A | P  | I  | T   | A   | D   | P   | V   | C   | G   | G   | V   | N   | P   | R   | Q |
| OP020171.1_BRAV3_NSWL13.1 | A | P  | I  | T   | A   | D   | P   | V   | C   | G   |     |     |     |     |     |   |







Z004695.1.CHN1\_L210  
 MZ004696.1.CHN1\_L211  
 MZ004694.1.CHN1\_L201  
 KP236128.1.Sd-1  
 NC\_038303.1.Sd-1  
 K1948520.1.RS3X  
 JN936206.1.H3  
 KUI59362.1.BS16-2  
 KP264974.1.BSRI4  
 KUI59364.1.USTII\_02  
 KP236129.1.140032-1  
 KUI59363.1.MexB15  
 OP020164.1.BRAV3\_NSWL15  
 OP020165.1.BRAV3\_NSWL4  
 OP020166.1.BRAV3\_NSWL9  
 OP020167.1.BRAV3\_NSWL13  
 OP020168.1.BRAV3\_NSWL3  
 OP020173.1.BRAV3\_NSWL8  
 OP020163.1.BRAV3\_NSWL12  
 OP020169.1.BRAV3\_NSWL10  
 OP020170.1.BRAV3\_NSWL6  
 OP020162.1.BRAV3\_NSWL6.1  
 OP020171.1.BRAV3\_NSWL13.1



Multiple Sequence Alignment of BRBV

Sequence alignment visualization showing 100 sequences (Accession numbers on the left) aligned across 130 positions (columns). The alignment is color-coded by amino acid type: A (green), C (blue), D (cyan), E (light blue), F (yellow), G (light green), H (orange), I (dark green), K (red), L (dark blue), M (brown), N (purple), P (pink), Q (light purple), R (dark red), S (light blue), T (light green), V (dark green), W (dark blue), Y (yellow).

Key features of the alignment:

- Conserved Regions:** High conservation is observed in the N-terminal region (positions 1-100) and the C-terminal region (positions 110-130).
- Variable Regions:** Significant sequence variation is present in the middle region (positions 100-110), particularly around position 105.
- Accession Numbers:** The sequences are identified by accession numbers such as M2052127, M2052128, OL410606, KY432299, MT160419, M2574106, KUI59357, KUI59358, EU236594, NC\_010354, MT700546, KUI68862, KP264980, OL410605, KUI59360, KUI59361, KP236130, OP020154, OP020155, OP020156, OP020157, OP020158, and others.



[illegible]



|                          | 1340 | 1350 | 1360 | 1370 | 1380 | 1390 | 1400 | 1410 | 1420 | 1430 | 1440 | 1450 | 1460 |   |   |   |   |   |   |   |   |   |   |   |   |   |   |   |   |   |   |   |   |   |   |   |   |   |   |   |   |   |   |   |   |   |   |   |   |   |   |   |   |   |   |   |   |   |   |   |   |   |   |   |   |   |   |   |   |   |   |   |   |   |   |   |   |   |   |   |   |   |   |   |   |   |   |   |   |   |   |   |   |   |   |   |   |   |   |   |   |   |   |   |   |   |   |   |   |   |   |   |   |   |   |   |   |   |   |   |   |   |   |   |   |   |   |
|--------------------------|------|------|------|------|------|------|------|------|------|------|------|------|------|---|---|---|---|---|---|---|---|---|---|---|---|---|---|---|---|---|---|---|---|---|---|---|---|---|---|---|---|---|---|---|---|---|---|---|---|---|---|---|---|---|---|---|---|---|---|---|---|---|---|---|---|---|---|---|---|---|---|---|---|---|---|---|---|---|---|---|---|---|---|---|---|---|---|---|---|---|---|---|---|---|---|---|---|---|---|---|---|---|---|---|---|---|---|---|---|---|---|---|---|---|---|---|---|---|---|---|---|---|---|---|---|---|---|
| MZ052127.1_BREV_SC1_LZ02 | F    | N    | S    | P    | V    | I    | A    | T    | T    | M    | H    | E    | F    | T | P | K | T | M | A | C | P | G | A | L | V | R | R | F | T | D | Y | V | L | A | A | K | K | P | Y | I | R | E | K | T | E | T | L | N | V | R | K | A | L | A | A | S | G | H | E | C | P | C | G | L | F | E | F | D | C | P | L | L | N | G | E | A | I | D | L | T | P | V | R | E | T | P | A | V | E | S | V | Y | E | L | I | E | L | V | Y | N | E | V | M | D | R | R | A | V | S | D | L | K | I | L | K | Q | M | G | K | Y | T | L | D | I | K | K | H |
| MZ052128.1_BREV_SC1_LZ05 | F    | N    | S    | P    | V    | I    | A    | T    | T    | M    | H    | E    | F    | T | P | K | T | M | A | C | P | G | A | L | V | R | R | F | T | D | Y | V | L | A | A | K | K | P | Y | I | R | E | K | T | E | T | L | N | V | R | K | A | L | A | A | S | G | H | E | C | P | C | G | L | F | E | F | D | C | P | L | L | N | G | E | A | I | D | L | T | P | V | R | E | T | P | A | V | E | S | V | Y | E | L | I | E | L | V | Y | N | E | V | M | D | R | R | A | V | S | D | L | K | I | L | K | Q | M | G | K | Y | T | L | D | I | K | K | H |
| OL410606.1_BREV_B10      | F    | N    | S    | P    | V    | I    | A    | T    | T    | M    | H    | E    | F    | T | P | K | T | M | A | C | P | G | A | L | V | R | R | F | T | D | Y | V | L | A | A | K | K | P | Y | I | R | E | K | T | E | T | L | N | V | R | K | A | L | A | A | S | G | H | E | C | P | C | G | L | F | E | F | D | C | P | L | L | N | G | E | A | I | D | L | T | P | V | R | E | T | P | A | V | E | S | V | Y | E | L | I | E | L | V | Y | N | E | V | M | D | R | R | A | V | S | D | L | K | I | L | K | Q | M | G | K | Y | T | L | D | I | K | K | H |
| KY432299.1_BREV_2_SWE1   | F    | N    | S    | P    | V    | I    | A    | T    | T    | M    | H    | E    | F    | T | P | K | T | M | A | C | P | G | A | L | V | R | R | F | T | D | Y | V | L | A | A | K | K | P | Y | I | R | E | K | T | E | T | L | N | V | R | K | A | L | A | A | S | G | H | E | C | P | C | G | L | F | E | F | D | C | P | L | L | N | G | E | A | I | D | L | T | P | V | R | E | T | P | A | V | E | S | V | Y | E | L | I | E | L | V | Y | N | E | V | M | D | R | R | A | V | S | D | L | K | I | L | K | Q | M | G | K | Y | T | L | D | I | K | K | H |
| MT160419.1_BREV_CHN1     | F    | N    | S    | P    | V    | I    | A    | T    | T    | M    | H    | E    | F    | T | P | K | T | M | A | C | P | G | A | L | V | R | R | F | T | D | Y | V | L | A | A | K | K | P | Y | I | R | E | K | T | E | T | L | N | V | R | K | A | L | A | A | S | G | H | E | C | P | C | G | L | F | E | F | D | C | P | L | L | N | G | E | A | I | D | L | T | P | V | R | E | T | P | A | V | E | S | V | Y | E | L | I | E | L | V | Y | N | E | V | M | D | R | R | A | V | S | D | L | K | I | L | K | Q | M | G | K | Y | T | L | D | I | K | K | H |
| MZ574106.1_BREV_6900     | F    | N    | S    | P    | V    | I    | A    | T    | T    | M    | H    | E    | F    | T | P | K | T | M | A | C | P | G | A | L | V | R | R | F | T | D | Y | V | L | A | A | K | K | P | Y | I | R | E | K | T | E | T | L | N | V | R | K | A | L | A | A | S | G | H | E | C | P | C | G | L | F | E | F | D | C | P | L | L | N | G | E | A | I | D | L | T | P | V | R | E | T | P | A | V | E | S | V | Y | E | L | I | E | L | V | Y | N | E | V | M | D | R | R | A | V | S | D | L | K | I | L | K | Q | M | G | K | Y | T | L | D | I | K | K | H |
| KUI59357.1_BREV_MexB10   | F    | N    | S    | P    | V    | I    | A    | T    | T    | M    | H    | E    | F    | T | P | K | T | M | A | C | P | G | A | L | V | R | R | F | T | D | Y | V | L | A | A | K | K | P | Y | I | R | E | K | T | E | T | L | N | V | R | K | A | L | A | A | S | G | H | E | C | P | C | G | L | F | E | F | D | C | P | L | L | N | G | E | A | I | D | L | T | P | V | R | E | T | P | A | V | E | S | V | Y | E | L | I | E | L | V | Y | N | E | V | M | D | R | R | A | V | S | D | L | K | I | L | K | Q | M | G | K | Y | T | L | D | I | K | K | H |
| KUI68861.1_BREV_4_TCH5   | F    | N    | S    | P    | V    | I    | A    | T    | T    | M    | H    | E    | F    | T | P | K | T | M | A | C | P | G | A | L | V | R | R | F | T | D | Y | V | L | A | A | K | K | P | Y | I | R | E | K | T | E | T | L | N | V | R | K | A | L | A | A | S | G | H | E | C | P | C | G | L | F | E | F | D | C | P | L | L | N | G | E | A | I | D | L | T | P | V | R | E | T | P | A | V | E | S | V | Y | E | L | I | E | L | V | Y | N | E | V | M | D | R | R | A | V | S | D | L | K | I | L | K | Q | M | G | K | Y | T | L | D | I | K | K | H |
| KUI59358.1_BREV_MexB29   | F    | N    | S    | P    | V    | I    | A    | T    | T    | M    | H    | E    | F    | T | P | K | T | M | A | C | P | G | A | L | V | R | R | F | T | D | Y | V | L | A | A | K | K | P | Y | I | R | E | K | T | E | T | L | N | V | R | K | A | L | A | A | S | G | H | E | C | P | C | G | L | F | E | F | D | C | P | L | L | N | G | E | A | I | D | L | T | P | V | R | E | T | P | A | V | E | S | V | Y | E | L | I | E | L | V | Y | N | E | V | M | D | R | R | A | V | S | D | L | K | I | L | K | Q | M | G | K | Y | T | L | D | I | K | K | H |
| EU236594.1_BREV_1_BC11   | F    | N    | S    | P    | V    | I    | A    | T    | T    | M    | H    | E    | F    | T | P | K | T | M | A | C | P | G | A | L | V | R | R | F | T | D | Y | V | L | A | A | K | K | P | Y | I | R | E | K | T | E | T | L | N | V | R | K | A | L | A | A | S | G | H | E | C | P | C | G | L | F | E | F | D | C | P | L | L | N | G | E | A | I | D | L | T | P | V | R | E | T | P | A | V | E | S | V | Y | E | L | I | E | L | V | Y | N | E | V | M | D | R | R | A | V | S | D | L | K | I | L | K | Q | M | G | K | Y | T | L | D | I | K | K | H |
| NC_010354.1_BREV_1_BC11  | F    | N    | S    | P    | V    | I    | A    | T    | T    | M    | H    | E    | F    | T | P | K | T | M | A | C | P | G | A | L | V | R | R | F | T | D | Y | V | L | A | A | K | K | P | Y | I | R | E | K | T | E | T | L | N | V | R | K | A | L | A | A | S | G | H | E | C | P | C | G | L | F | E | F | D | C | P | L | L | N | G | E | A | I | D | L | T | P | V | R | E | T | P | A | V | E | S | V | Y | E | L | I | E | L | V | Y | N | E | V | M | D | R | R | A | V | S | D | L | K | I | L | K | Q | M | G | K | Y | T | L | D | I | K | K | H |
| MT700546.1_BREV          | F    | N    | S    | P    | V    | I    | A    | T    | T    | M    | H    | E    | F    | T | P | K | T | M | A | C | P | G | A | L | V | R | R | F | T | D | Y | V | L | A | A | K | K | P | Y | I | R | E | K | T | E | T | L | N | V | R | K | A | L | A | A | S | G | H | E | C | P | C | G | L | F | E | F | D | C | P | L | L | N | G | E | A | I | D | L | T | P | V | R | E | T | P | A | V | E | S | V | Y | E | L | I | E | L | V | Y | N | E | V | M | D | R | R | A | V | S | D | L | K | I | L | K | Q | M | G | K | Y | T | L | D | I | K | K | H |
| MT700547.1_BREV          | F    | N    | S    | P    | V    | I    | A    | T    | T    | M    | H    | E    | F    | T | P | K | T | M | A | C | P | G | A | L | V | R | R | F | T | D | Y | V | L | A | A | K | K | P | Y | I | R | E | K | T | E | T | L | N | V | R | K | A | L | A | A | S | G | H | E | C | P | C | G | L | F | E | F | D | C | P | L | L | N | G | E | A | I | D | L | T | P | V | R | E | T | P | A | V | E | S | V | Y | E | L | I | E | L | V | Y | N | E | V | M | D | R | R | A | V | S | D | L | K | I | L | K | Q | M | G | K | Y | T | L | D | I | K | K | H |
| KUI68862.1_BREV_TCH8     | F    | N    | S    | P    | V    | I    | A    | T    | T    | M    | H    | E    | F    | T | P | K | T | M | A | C | P | G | A | L | V | R | R | F | T | D | Y | V | L | A | A | K | K | P | Y | I | R | E | K | T | E | T | L | N | V | R | K | A | L | A | A | S | G | H | E | C | P | C | G | L | F | E | F | D | C | P | L | L | N | G | E | A | I | D | L | T | P | V | R | E | T | P | A | V | E | S | V | Y | E | L | I | E | L | V | Y | N | E | V | M | D | R | R | A | V | S | D | L | K | I | L | K | Q | M | G | K | Y | T | L | D | I | K | K | H |
| KP264980.1_BREV_BSR1     | F    | N    | S    | P    | V    | I    | A    | T    | T    | M    | H    | E    | F    | T | P | K | T | M | A | C | P | G | A | L | V | R | R | F | T | D | Y | V | L | A | A | K | K | P | Y | I | R | E | K | T | E | T | L | N | V | R | K | A | L | A | A | S | G | H | E | C | P | C | G | L | F | E | F | D | C | P | L | L | N | G | E | A | I | D | L | T | P | V | R | E | T | P | A | V | E | S | V | Y | E | L | I | E | L | V | Y | N | E | V | M | D | R | R | A | V | S | D | L | K | I | L | K | Q | M | G | K | Y | T | L | D | I | K | K | H |
| OL410605.1_BREV_D2       | F    | N    | S    | P    | V    | I    | A    | T    | T    | M    | H    | E    | F    | T | P | K | T | M | A | C | P | G | A | L | V | R | R | F | T | D | Y | V | L | A | A | K | K | P | Y | I | R | E | K | T | E | T | L | N | V | R | K | A | L | A | A | S | G | H | E | C | P | C | G | L | F | E | F | D | C | P | L | L | N | G | E | A | I | D | L | T | P | V | R | E | T | P | A | V | E | S | V | Y | E | L | I | E | L | V | Y | N | E | V | M | D | R | R | A | V | S | D | L | K | I | L | K | Q | M | G | K | Y | T | L | D | I | K | K | H |
| KUI59360.1_BREV_5_MexB09 | F    | N    | S    | P    | V    | I    | A    | T    | T    | M    | H    | E    | F    | T | P | K | T | M | A | C | P | G | A | L | V | R | R | F | T | D | Y | V | L | A | A | K | K | P | Y | I | R | E | K | T | E | T | L | N | V | R | K | A | L | A | A | S | G | H | E | C | P | C | G | L | F | E | F | D | C | P | L | L | N | G | E | A | I | D | L | T | P | V | R | E | T | P | A | V | E | S | V | Y | E | L | I | E | L | V | Y | N | E | V | M | D | R | R | A | V | S | D | L | K | I | L | K | Q | M | G | K | Y | T | L | D | I | K | K | H |
| KP264975.1_BREV_3_BSR13  | F    | N    | S    | P    | V    | I    | A    | T    | T    | M    | H    | E    | F    | T | P | K | T | M | A | C | P | G | A | L | V | R | R | F | T | D | Y | V | L | A | A | K | K | P | Y | I | R | E | K | T | E | T | L | N | V | R | K | A | L | A | A | S | G | H | E | C | P | C | G | L | F | E | F | D | C | P | L | L | N | G | E | A | I | D | L | T | P | V | R | E | T | P | A | V | E | S | V | Y | E | L | I | E | L | V | Y | N | E | V | M | D | R | R | A | V | S | D | L | K | I | L | K | Q | M | G | K | Y | T | L | D | I | K | K | H |
| KUI59361.1_BREV_MexB48   | F    | N    | S    | P    | V    | I    | A    | T    | T    | M    | H    | E    | F    | T | P | K | T | M | A | C | P | G | A | L | V | R | R | F | T | D | Y | V | L | A | A | K | K | P | Y | I | R | E | K | T | E | T | L | N | V | R | K | A | L |   |   |   |   |   |   |   |   |   |   |   |   |   |   |   |   |   |   |   |   |   |   |   |   |   |   |   |   |   |   |   |   |   |   |   |   |   |   |   |   |   |   |   |   |   |   |   |   |   |   |   |   |   |   |   |   |   |   |   |   |   |   |   |   |   |   |   |   |   |   |   |   |   |   |

|                          | 1470 | 1480 | 1490 | 1500 | 1510 | 1520 | 1530 | 1540 | 1550 | 1560 | 1570 | 1580 | 1590 |   |   |   |   |   |   |   |   |   |   |   |   |   |   |   |   |   |   |   |   |   |   |   |   |   |   |   |   |   |   |   |   |   |   |   |   |   |   |   |   |   |   |   |   |   |   |   |   |   |   |   |   |   |   |   |   |   |   |   |   |   |   |   |   |   |   |   |   |   |   |   |   |   |   |   |   |   |   |   |   |   |   |   |   |   |   |   |   |   |   |   |   |   |   |   |   |   |   |   |   |   |   |   |   |   |   |     |   |   |   |   |
|--------------------------|------|------|------|------|------|------|------|------|------|------|------|------|------|---|---|---|---|---|---|---|---|---|---|---|---|---|---|---|---|---|---|---|---|---|---|---|---|---|---|---|---|---|---|---|---|---|---|---|---|---|---|---|---|---|---|---|---|---|---|---|---|---|---|---|---|---|---|---|---|---|---|---|---|---|---|---|---|---|---|---|---|---|---|---|---|---|---|---|---|---|---|---|---|---|---|---|---|---|---|---|---|---|---|---|---|---|---|---|---|---|---|---|---|---|---|---|---|---|---|-----|---|---|---|---|
| MZ052127.1_BRBV_SC1_LZ02 | K    | P    | T    | V    | P    | F    | P    | S    | G    | G    | Y    | Q    | P    | G | R | D | I | N | A | S | P | E | M | Q | E | K | L | L | K | Y | L | V | K | N | E | H | L | D | A | A | L | N | F | Y | N | E | E | C | D | E | D | V | R | K | T | G | P | S | I | G | E | L | K | V | K | T | L | M | K | V | K | K | Y | S | H | L | F | T | G | L | M | L | I | G | H | M | L | L | L | L | N | H | R | T | P | E | E | K | K | K | K | K | N | K | T | E | E | D | N | T | K | E | G | P | Y | G | G | A | K | P   | P | V | K | V |
| MZ052128.1_BRBV_SC1_LZ05 | K    | P    | T    | V    | P    | F    | P    | S    | G    | G    | Y    | Q    | P    | G | R | D | I | N | A | S | P | E | M | Q | E | K | L | L | K | Y | L | V | K | N | E | H | L | D | A | A | L | N | F | Y | N | E | E | C | D | E | D | V | R | K | T | G | P | S | I | G | E | L | K | V | K | T | L | M | K | V | K | K | Y | S | H | L | F | T | G | L | M | L | I | G | H | M | L | L | L | L | N | H | R | T | P | E | E | K | K | K | K | N | K | T | E | E | D | N | T | K | E | G | P | Y | G | G | A | K | P | P   | V | K | V |   |
| OL410606.1_BRBV_B10      | K    | P    | T    | V    | P    | F    | P    | S    | G    | G    | Y    | Q    | P    | G | R | D | I | N | A | S | P | E | M | Q | E | K | L | L | K | Y | L | V | K | N | E | H | L | D | A | A | L | N | F | Y | N | E | E | C | D | E | D | V | R | K | T | G | P | S | I | G | E | L | K | V | K | T | L | M | K | V | K | K | Y | S | H | L | F | T | G | L | M | L | I | G | H | M | L | L | L | L | N | H | R | T | P | E | E | K | K | K | K | N | K | T | E | E | D | N | T | K | E | G | P | Y | G | G | A | K | P | P   | V | K | V |   |
| KY432299.1_BRBV_2_SWE1   | K    | P    | T    | V    | P    | F    | P    | S    | G    | G    | Y    | Q    | P    | G | R | D | I | N | A | S | P | E | M | Q | E | K | L | L | K | Y | L | V | K | N | E | H | L | D | A | A | L | N | F | Y | N | E | E | C | D | E | D | V | R | K | T | G | P | S | I | G | E | L | K | V | K | T | L | M | K | V | K | K | Y | S | H | L | F | T | G | L | M | L | I | G | H | M | L | L | L | L | N | H | R | T | P | E | E | K | K | K | K | N | K | T | E | E | D | N | T | K | E | G | P | Y | G | G | A | K | P | P   | V | K | V |   |
| MT160419.1_BRBV_CHN1     | K    | P    | T    | V    | P    | F    | P    | S    | G    | G    | Y    | Q    | P    | G | R | D | I | N | A | S | P | E | M | Q | E | K | L | L | K | Y | L | V | K | N | E | H | L | D | A | A | L | N | F | Y | N | E | E | C | D | E | D | V | R | K | T | G | P | S | I | G | E | L | K | V | K | T | L | M | K | V | K | K | Y | S | H | L | F | T | G | L | M | L | I | G | H | M | L | L | L | L | N | H | R | T | P | E | E | K | K | K | K | N | K | T | E | E | D | N | T | K | E | G | P | Y | G | G | A | K | P | P   | V | K | V |   |
| MZ574106.1_BRBV_6900     | K    | P    | T    | V    | P    | F    | P    | S    | G    | G    | Y    | Q    | P    | G | R | D | I | N | A | S | P | E | M | Q | E | K | L | L | K | Y | L | V | K | N | E | H | L | D | A | A | L | N | F | Y | N | E | E | C | D | E | D | V | R | K | T | G | P | S | I | G | E | L | K | V | K | T | L | M | K | V | K | K | Y | S | H | L | F | T | G | L | M | L | I | G | H | M | L | L | L | L | N | H | R | T | P | E | E | K | K | K | K | N | K | T | E | E | D | N | T | K | E | G | P | Y | G | G | A | K | P | P   | V | K | V |   |
| KUI59357.1_BRBV_MexB10   | K    | P    | T    | V    | P    | F    | P    | S    | G    | G    | Y    | Q    | P    | G | R | D | I | N | A | S | P | E | M | Q | E | K | L | L | K | Y | L | V | K | N | E | H | L | D | A | A | L | N | F | Y | N | E | E | C | D | E | D | V | R | K | T | G | P | S | I | G | E | L | K | V | K | T | L | M | K | V | K | K | Y | S | H | L | F | T | G | L | M | L | I | G | H | M | L | L | L | L | N | H | R | T | P | E | E | K | K | K | K | N | K | T | E | E | D | N | T | K | E | G | P | Y | G | G | A | K | P | P   | V | K | V |   |
| KUI68861.1_BRBV_4_TCH5   | K    | P    | T    | V    | P    | F    | P    | S    | G    | G    | Y    | Q    | P    | G | R | D | I | N | A | S | P | E | M | Q | E | K | L | L | K | Y | L | V | K | N | E | H | L | D | A | A | L | N | F | Y | N | E | E | C | D | E | D | V | R | K | T | G | P | S | I | G | E | L | K | V | K | T | L | M | K | V | K | K | Y | S | H | L | F | T | G | L | M | L | I | G | H | M | L | L | L | L | N | H | R | T | P | E | E | K | K | K | K | N | K | T | E | E | D | N | T | K | E | G | P | Y | G | G | A | K | P | P   | V | K | V |   |
| KUI59358.1_BRBV_MexB29   | K    | P    | T    | V    | P    | F    | P    | S    | G    | G    | Y    | Q    | P    | G | R | D | I | N | A | S | P | E | M | Q | E | K | L | L | K | Y | L | V | K | N | E | H | L | D | A | A | L | N | F | Y | N | E | E | C | D | E | D | V | R | K | T | G | P | S | I | G | E | L | K | V | K | T | L | M | K | V | K | K | Y | S | H | L | F | T | G | L | M | L | I | G | H | M | L | L | L | L | N | H | R | T | P | E | E | K | K | K | K | N | K | T | E | E | D | N | T | K | E | G | P | Y | G | G | A | K | P | P   | V | K | V |   |
| EU236594.1_BRBV_1_EC11   | K    | P    | T    | V    | P    | F    | P    | S    | G    | G    | Y    | Q    | P    | G | R | D | I | N | A | S | P | E | M | Q | E | K | L | L | K | Y | L | V | K | N | E | H | L | D | A | A | L | N | F | Y | N | E | E | C | D | E | D | V | R | K | T | G | P | S | I | G | E | L | K | V | K | T | L | M | K | V | K | K | Y | S | H | L | F | T | G | L | M | L | I | G | H | M | L | L | L | L | N | H | R | T | P | E | E | K | K | K | K | N | K | T | E | E | D | N | T | K | E | G | P | Y | G | G | A | K | P | P   | V | K | V |   |
| NC_010354.1_BRBV_1_EC11  | K    | P    | T    | V    | P    | F    | P    | S    | G    | G    | Y    | Q    | P    | G | R | D | I | N | A | S | P | E | M | Q | E | K | L | L | K | Y | L | V | K | N | E | H | L | D | A | A | L | N | F | Y | N | E | E | C | D | E | D | V | R | K | T | G | P | S | I | G | E | L | K | V | K | T | L | M | K | V | K | K | Y | S | H | L | F | T | G | L | M | L | I | G | H | M | L | L | L | L | N | H | R | T | P | E | E | K | K | K | K | N | K | T | E | E | D | N | T | K | E | G | P | Y | G | G | A | K | P | P   | V | K | V |   |
| MT109564.1_BRBV          | K    | P    | T    | V    | P    | F    | P    | S    | G    | G    | Y    | Q    | P    | G | R | D | I | N | A | S | P | E | M | Q | E | K | L | L | K | Y | L | V | K | N | E | H | L | D | A | A | L | N | F | Y | N | E | E | C | D | E | D | V | R | K | T | G | P | S | I | G | E | L | K | V | K | T | L | M | K | V | K | K | Y | S | H | L | F | T | G | L | M | L | I | G | H | M | L | L | L | L | N | H | R | T | P | E | E | K | K | K | K | N | K | T | E | E | D | N | T | K | E | G | P | Y | G | G | A | K | P | P   | V | K | V |   |
| MT700547.1_BRBV          | K    | P    | T    | V    | P    | F    | P    | S    | G    | G    | Y    | Q    | P    | G | R | D | I | N | A | S | P | E | M | Q | E | K | L | L | K | Y | L | V | K | N | E | H | L | D | A | A | L | N | F | Y | N | E | E | C | D | E | D | V | R | K | T | G | P | S | I | G | E | L | K | V | K | T | L | M | K | V | K | K | Y | S | H | L | F | T | G | L | M | L | I | G | H | M | L | L | L | L | N | H | R | T | P | E | E | K | K | K | K | N | K | T | E | E | D | N | T | K | E | G | P | Y | G | G | A | K | P | P   | V | K | V |   |
| KUI68862.1_BRBV_TCH8     | K    | P    | T    | V    | P    | F    | P    | S    | G    | G    | Y    | Q    | P    | G | R | D | I | N | A | S | P | E | M | Q | E | K | L | L | K | Y | L | V | K | N | E | H | L | D | A | A | L | N | F | Y | N | E | E | C | D | E | D | V | R | K | T | G | P | S | I | G | E | L | K | V | K | T | L | M | K | V | K | K | Y | S | H | L | F | T | G | L | M | L | I | G | H | M | L | L | L | L | N | H | R | T | P | E | E | K | K | K | K | N | K | T | E | E | D | N | T | K | E | G | P | Y | G | G | A | K | P | P   | V | K | V |   |
| KP264594.1_BRBV_BSRI1    | K    | P    | T    | V    | P    | F    | P    | S    | G    | G    | Y    | Q    | P    | G | R | D | I | N | A | S | P | E | M | Q | E | K | L | L | K | Y | L | V | K | N | E | H | L | D | A | A | L | N | F | Y | N | E | E | C | D | E | D | V | R | K | T | G | P | S | I | G | E | L | K | V | K | T | L | M | K | V | K | K | Y | S | H | L | F | T | G | L | M | L | I | G | H | M | L | L | L | L | N | H | R | T | P | E | E | K | K | K | K | N | K | T | E | E | D | N | T | K | E | G | P | Y | G | G | A | K | P | P   | V | K | V |   |
| OL410605.1_BRBV_D2       | K    | P    | T    | V    | P    | F    | P    | S    | G    | G    | Y    | Q    | P    | G | R | D | I | N | A | S | P | E | M | Q | E | K | L | L | K | Y | L | V | K | N | E | H | L | D | A | A | L | N | F | Y | N | E | E | C | D | E | D | V | R | K | T | G | P | S | I | G | E | L | K | V | K | T | L | M | K | V | K | K | Y | S | H | L | F | T | G | L | M | L | I | G | H | M | L | L | L | L | N | H | R | T | P | E | E | K | K | K | K | N | K | T | E | E | D | N | T | K | E | G | P | Y | G | G | A | K | P | P   | V | K | V |   |
| KUI59360.1_BRBV_5_MexB09 | K    | P    | T    | V    | P    | F    | P    | S    | G    | G    | Y    | Q    | P    | G | R | D | I | N | A | S | P | E | M | Q | E | K | L | L | K | Y | L | V | K | N | E | H | L | D | A | A | L | N | F | Y | N | E | E | C | D | E | D | V | R | K | T | G | P | S | I | G | E | L | K | V | K | T | L | M | K | V | K | K | Y | S | H | L | F | T | G | L | M | L | I | G | H | M | L | L | L | L | N | H | R | T | P | E | E | K | K | K | K | N | K | T | E | E | D | N | T | K | E | G | P | Y | G | G | A | K | P | P   | V | K | V |   |
| KP264975.1_BRBV_3_BSRI3  | K    | P    | T    | V    | P    | F    | P    | S    | G    | G    | Y    | Q    | P    | G | R | D | I | N | A | S | P | E | M | Q | E | K | L | L | K | Y | L | V | K | N | E | H | L | D | A | A | L | N | F | Y | N | E | E | C | D | E | D | V | R | K | T | G | P | S | I | G | E | L | K | V | K | T | L | M | K | V | K | K | Y | S | H | L | F | T | G | L | M | L | I | G | H | M | L | L | L | L | N | H | R | T | P | E | E | K | K | K | K | N | K | T | E | E | D | N | T | K | E | G | P | Y | G | G | A | K | P | P   | V | K | V |   |
| KUI59361.1_BRBV_MexB48   | K    | P    | T    | V    | P    | F    | P    | S    | G    | G    | Y    | Q    | P    | G | R | D | I | N | A | S | P | E | M | Q | E | K | L | L | K | Y | L | V | K | N | E | H | L | D | A | A | L | N | F | Y | N | E | E | C | D | E | D | V | R | K | T | G | P | S | I | G | E | L | K | V | K | T | L | M | K | V | K | K | Y | S | H | L | F | T | G | L | M | L | I | G | H | M | L | L | L | L | N | H | R | T | P | E | E | K | K | K | K | N | K | T | E | E | D | N | T | K | E | G | P | Y | G | G | A | K | P | P</ |   |   |   |   |

|                          | 1600 | 1610 | 1620 | 1630 | 1640 | 1650 | 1660 | 1670 | 1680 | 1690 | 1700 | 1710 | 1720 |   |   |   |   |   |   |   |   |   |   |   |   |   |   |   |   |   |   |   |   |   |   |   |   |   |   |   |   |   |   |   |   |   |   |   |   |   |   |   |   |   |   |   |   |   |   |   |   |   |   |   |   |   |   |   |   |   |   |   |   |   |   |   |   |   |   |   |   |   |   |   |   |   |   |   |   |   |   |   |   |   |   |   |   |   |   |   |   |   |   |   |   |   |   |   |   |   |   |   |   |   |   |   |   |   |   |   |   |   |   |   |   |   |   |   |   |   |   |
|--------------------------|------|------|------|------|------|------|------|------|------|------|------|------|------|---|---|---|---|---|---|---|---|---|---|---|---|---|---|---|---|---|---|---|---|---|---|---|---|---|---|---|---|---|---|---|---|---|---|---|---|---|---|---|---|---|---|---|---|---|---|---|---|---|---|---|---|---|---|---|---|---|---|---|---|---|---|---|---|---|---|---|---|---|---|---|---|---|---|---|---|---|---|---|---|---|---|---|---|---|---|---|---|---|---|---|---|---|---|---|---|---|---|---|---|---|---|---|---|---|---|---|---|---|---|---|---|---|---|---|---|---|---|
| MZ052127.1_BRBV_SC1_L202 | V    | D    | K    | L    | K    | V    | N    | P    | L    | I    | T    | T    | E    | S | G | N | P | P | T | D | M | Q | M | V | V | L | K | N | T | Q | P | I | S | L | R | D | G | Q | I | V | A | T | C | C | A | L | G | V | F | G | T | T | T | L | V | P | Y | H | L | F | E | E | S | F | D | T | L | V | I | G | D | R | H | L | K | E | Q | D | Y | K | L | D | T | F | E | L | D | G | K | S | D | V | A | A | L | T | L | N | K | G | A | R | V | R | D | I | T | S | H | F | R | D | E | V | K | V | T | K | N | S | P | V | V | G | C | V | K | N | T | T | V |
| MZ052128.1_BRBV_SC1_L205 | V    | D    | K    | L    | K    | V    | N    | P    | L    | I    | T    | T    | E    | S | G | N | P | P | T | D | M | Q | M | V | V | L | K | N | T | Q | P | I | S | L | R | D | G | Q | I | V | A | T | C | C | A | L | G | V | F | G | T | T | T | L | V | P | Y | H | L | F | E | E | S | F | D | T | L | V | I | G | D | R | H | L | K | E | Q | D | Y | K | L | D | T | F | E | L | D | G | K | S | D | V | A | A | L | T | L | N | K | G | A | R | V | R | D | I | T | S | H | F | R | D | E | V | K | V | T | K | N | S | P | V | V | G | C | V | K | N | T | T | V |
| OL410606.1_BRBV_B10      | V    | D    | K    | L    | K    | V    | N    | P    | L    | I    | T    | T    | E    | S | G | N | P | P | T | D | M | Q | M | V | V | L | K | N | T | Q | P | I | S | L | R | D | G | Q | I | V | A | T | C | C | A | L | G | V | F | G | T | T | T | L | V | P | Y | H | L | F | E | E | S | F | D | T | L | V | I | G | D | R | H | L | K | E | Q | D | Y | K | L | D | T | F | E | L | D | G | K | S | D | V | A | A | L | T | L | N | K | G | A | R | V | R | D | I | T | S | H | F | R | D | E | V | K | V | T | K | N | S | P | V | V | G | C | V | K | N | T | T | V |
| KY432299.1_BRBV_2_SWE1   | V    | D    | K    | L    | K    | V    | N    | P    | L    | I    | T    | T    | E    | S | G | N | P | P | T | D | M | Q | M | V | V | L | K | N | T | Q | P | I | S | L | R | D | G | Q | I | V | A | T | C | C | A | L | G | V | F | G | T | T | T | L | V | P | Y | H | L | F | E | E | S | F | D | T | L | V | I | G | D | R | H | L | K | E | Q | D | Y | K | L | D | T | F | E | L | D | G | K | S | D | V | A | A | L | T | L | N | K | G | A | R | V | R | D | I | T | S | H | F | R | D | E | V | K | V | T | K | N | S | P | V | V | G | C | V | K | N | T | T | V |
| MT160419.1_BRBV_CHN1     | V    | D    | K    | L    | K    | V    | N    | P    | L    | I    | T    | T    | E    | S | G | N | P | P | T | D | M | Q | M | V | V | L | K | N | T | Q | P | I | S | L | R | D | G | Q | I | V | A | T | C | C | A | L | G | V | F | G | T | T | T | L | V | P | Y | H | L | F | E | E | S | F | D | T | L | V | I | G | D | R | H | L | K | E | Q | D | Y | K | L | D | T | F | E | L | D | G | K | S | D | V | A | A | L | T | L | N | K | G | A | R | V | R | D | I | T | S | H | F | R | D | E | V | K | V | T | K | N | S | P | V | V | G | C | V | K | N | T | T | V |
| MZ574106.1_BRBV_6900     | V    | D    | K    | L    | K    | V    | N    | P    | L    | I    | T    | T    | E    | S | G | N | P | P | T | D | M | Q | M | V | V | L | K | N | T | Q | P | I | S | L | R | D | G | Q | I | V | A | T | C | C | A | L | G | V | F | G | T | T | T | L | V | P | Y | H | L | F | E | E | S | F | D | T | L | V | I | G | D | R | H | L | K | E | Q | D | Y | K | L | D | T | F | E | L | D | G | K | S | D | V | A | A | L | T | L | N | K | G | A | R | V | R | D | I | T | S | H | F | R | D | E | V | K | V | T | K | N | S | P | V | V | G | C | V | K | N | T | T | V |
| KU159357.1_BRBV_MexB10   | V    | D    | K    | L    | K    | V    | N    | P    | L    | I    | T    | T    | E    | S | G | N | P | P | T | D | M | Q | M | V | V | L | K | N | T | Q | P | I | S | L | R | D | G | Q | I | V | A | T | C | C | A | L | G | V | F | G | T | T | T | L | V | P | Y | H | L | F | E | E | S | F | D | T | L | V | I | G | D | R | H | L | K | E | Q | D | Y | K | L | D | T | F | E | L | D | G | K | S | D | V | A | A | L | T | L | N | K | G | A | R | V | R | D | I | T | S | H | F | R | D | E | V | K | V | T | K | N | S | P | V | V | G | C | V | K | N | T | T | V |
| KU168861.1_BRBV_4_TCH5   | V    | D    | K    | L    | K    | V    | N    | P    | L    | I    | T    | T    | E    | S | G | N | P | P | T | D | M | Q | M | V | V | L | K | N | T | Q | P | I | S | L | R | D | G | Q | I | V | A | T | C | C | A | L | G | V | F | G | T | T | T | L | V | P | Y | H | L | F | E | E | S | F | D | T | L | V | I | G | D | R | H | L | K | E | Q | D | Y | K | L | D | T | F | E | L | D | G | K | S | D | V | A | A | L | T | L | N | K | G | A | R | V | R | D | I | T | S | H | F | R | D | E | V | K | V | T | K | N | S | P | V | V | G | C | V | K | N | T | T | V |
| KU159358.1_BRBV_MexB29   | V    | D    | K    | L    | K    | V    | N    | P    | L    | I    | T    | T    | E    | S | G | N | P | P | T | D | M | Q | M | V | V | L | K | N | T | Q | P | I | S | L | R | D | G | Q | I | V | A | T | C | C | A | L | G | V | F | G | T | T | T | L | V | P | Y | H | L | F | E | E | S | F | D | T | L | V | I | G | D | R | H | L | K | E | Q | D | Y | K | L | D | T | F | E | L | D | G | K | S | D | V | A | A | L | T | L | N | K | G | A | R | V | R | D | I | T | S | H | F | R | D | E | V | K | V | T | K | N | S | P | V | V | G | C | V | K | N | T | T | V |
| EU236594.1_BRBV_1_EC11   | V    | D    | K    | L    | K    | V    | N    | P    | L    | I    | T    | T    | E    | S | G | N | P | P | T | D | M | Q | M | V | V | L | K | N | T | Q | P | I | S | L | R | D | G | Q | I | V | A | T | C | C | A | L | G | V | F | G | T | T | T | L | V | P | Y | H | L | F | E | E | S | F | D | T | L | V | I | G | D | R | H | L | K | E | Q | D | Y | K | L | D | T | F | E | L | D | G | K | S | D | V | A | A | L | T | L | N | K | G | A | R | V | R | D | I | T | S | H | F | R | D | E | V | K | V | T | K | N | S | P | V | V | G | C | V | K | N | T | T | V |
| NC_010054.1_BRBV_1_EC11  | V    | D    | K    | L    | K    | V    | N    | P    | L    | I    | T    | T    | E    | S | G | N | P | P | T | D | M | Q | M | V | V | L | K | N | T | Q | P | I | S | L | R | D | G | Q | I | V | A | T | C | C | A | L | G | V | F | G | T | T | T | L | V | P | Y | H | L | F | E | E | S | F | D | T | L | V | I | G | D | R | H | L | K | E | Q | D | Y | K | L | D | T | F | E | L | D | G | K | S | D | V | A | A | L | T | L | N | K | G | A | R | V | R | D | I | T | S | H | F | R | D | E | V | K | V | T | K | N | S | P | V | V | G | C | V | K | N | T | T | V |
| MT700546.1_BRBV          | V    | D    | K    | L    | K    | V    | N    | P    | L    | I    | T    | T    | E    | S | G | N | P | P | T | D | M | Q | M | V | V | L | K | N | T | Q | P | I | S | L | R | D | G | Q | I | V | A | T | C | C | A | L | G | V | F | G | T | T | T | L | V | P | Y | H | L | F | E | E | S | F | D | T | L | V | I | G | D | R | H | L | K | E | Q | D | Y | K | L | D | T | F | E | L | D | G | K | S | D | V | A | A | L | T | L | N | K | G | A | R | V | R | D | I | T | S | H | F | R | D | E | V | K | V | T | K | N | S | P | V | V | G | C | V | K | N | T | T | V |
| MT700547.1_BRBV          | V    | D    | K    | L    | K    | V    | N    | P    | L    | I    | T    | T    | E    | S | G | N | P | P | T | D | M | Q | M | V | V | L | K | N | T | Q | P | I | S | L | R | D | G | Q | I | V | A | T | C | C | A | L | G | V | F | G | T | T | T | L | V | P | Y | H | L | F | E | E | S | F | D | T | L | V | I | G | D | R | H | L | K | E | Q | D | Y | K | L | D | T | F | E | L | D | G | K | S | D | V | A | A | L | T | L | N | K | G | A | R | V | R | D | I | T | S | H | F | R | D | E | V | K | V | T | K | N | S | P | V | V | G | C | V | K | N | T | T | V |
| KU168862.1_BRBV_TCH8     | V    | D    | K    | L    | K    | V    | N    | P    | L    | I    | T    | T    | E    | S | G | N | P | P | T | D | M | Q | M | V | V | L | K | N | T | Q | P | I | S | L | R | D | G | Q | I | V | A | T | C | C | A | L | G | V | F | G | T | T | T | L | V | P | Y | H | L | F | E | E | S | F | D | T | L | V | I | G | D | R | H | L | K | E | Q | D | Y | K | L | D | T | F | E | L | D | G | K | S | D | V | A | A | L | T | L | N | K | G | A | R | V | R | D | I | T | S | H | F | R | D | E | V | K | V | T | K | N | S | P | V | V | G | C | V | K | N | T | T | V |
| KP264980.1_BRBV_BSR11    | V    | D    | K    | L    | K    | V    | N    | P    | L    | I    | T    | T    | E    | S | G | N | P | P | T | D | M | Q | M | V | V | L | K | N | T | Q | P | I | S | L | R | D | G | Q | I | V | A | T | C | C | A | L | G | V | F | G | T | T | T | L | V | P | Y | H | L | F | E | E | S | F | D | T | L | V | I | G | D | R | H | L | K | E | Q | D | Y | K | L | D | T | F | E | L | D | G | K | S | D | V | A | A | L | T | L | N | K | G | A | R | V | R | D | I | T | S | H | F | R | D | E | V | K | V | T | K | N | S | P | V | V | G | C | V | K | N | T | T | V |
| OL410605.1_BRBV_D2       | V    | D    | K    | L    | K    | V    | N    | P    | L    | I    | T    | T    | E    | S | G | N | P | P | T | D | M | Q | M | V | V | L | K | N | T | Q | P | I | S | L | R | D | G | Q | I | V | A | T | C | C | A | L | G | V | F | G | T | T | T | L | V | P | Y | H | L | F | E | E | S | F | D | T | L | V | I | G | D | R | H | L | K | E | Q | D | Y | K | L | D | T | F | E | L | D | G | K | S | D | V | A | A | L | T | L | N | K | G | A | R | V | R | D | I | T | S | H | F | R | D | E | V | K | V | T | K | N | S | P | V | V | G | C | V | K | N | T | T | V |
| KU159360.1_BRBV_5_MexB09 | V    | D    | K    | L    | K    | V    | N    | P    | L    | I    | T    | T    | E    | S | G | N | P | P | T | D | M | Q | M | V | V | L | K | N | T | Q | P | I | S | L | R | D | G | Q | I | V | A | T | C | C | A | L | G | V | F | G | T | T | T | L | V | P | Y | H | L | F | E | E | S | F | D | T | L | V | I | G | D | R | H | L | K | E | Q | D | Y | K | L | D | T | F | E | L | D | G | K | S | D | V | A | A | L | T | L | N | K | G | A | R | V | R | D | I | T | S | H | F | R | D | E | V | K | V | T | K | N | S | P | V | V | G | C | V | K | N | T | T | V |
| KP264975.1_BRBV_3_BSR13  | V    | D    | K    | L    | K    | V    | N    | P    | L    | I    | T    | T    | E    | S | G | N | P | P | T | D | M | Q | M | V | V | L | K | N | T | Q | P | I | S | L | R | D | G | Q | I | V | A | T | C | C | A | L | G | V | F | G | T | T | T | L | V | P | Y | H | L | F | E | E | S | F | D | T | L | V | I | G | D | R | H | L | K | E | Q | D | Y | K | L | D | T | F | E | L | D | G | K | S | D | V | A | A | L | T | L | N | K | G | A | R | V | R | D | I | T | S | H | F | R | D | E | V | K | V |   |   |   |   |   |   |   |   |   |   |   |   |   |   |   |

|                          | 1730 | 1740 | 1750 | 1760 | 1770 | 1780 | 1790 | 1800 | 1810 | 1820 | 1830 | 1840 | 1850 | 1860 |   |   |   |   |   |   |   |   |   |   |   |   |   |   |   |   |   |   |   |   |   |   |   |   |   |   |   |   |   |   |   |   |   |   |   |   |   |   |   |   |   |   |   |   |   |   |   |   |   |   |   |   |   |   |   |   |   |   |   |   |   |   |   |   |   |   |   |   |   |   |   |   |   |   |   |   |   |   |   |   |   |   |   |   |   |   |   |   |   |   |   |   |   |   |   |   |   |   |   |   |   |   |   |   |   |   |   |   |   |
|--------------------------|------|------|------|------|------|------|------|------|------|------|------|------|------|------|---|---|---|---|---|---|---|---|---|---|---|---|---|---|---|---|---|---|---|---|---|---|---|---|---|---|---|---|---|---|---|---|---|---|---|---|---|---|---|---|---|---|---|---|---|---|---|---|---|---|---|---|---|---|---|---|---|---|---|---|---|---|---|---|---|---|---|---|---|---|---|---|---|---|---|---|---|---|---|---|---|---|---|---|---|---|---|---|---|---|---|---|---|---|---|---|---|---|---|---|---|---|---|---|---|---|---|---|---|
| MZ052127.1_BRBV_SC1_L202 | V    | G    | Q    | L    | V    | F    | N    | G    | T    | A    | A    | G    | F    | K    | D | H | I | C | S | D | G | T | L | P | N | M | F | V | I | T | A | N | T | Q | Y | G | C | G | S | I | L | V | K | D | G | S | H | T | V | I | I | G | I | H | S | A | G | G | N | G | K | G | Y | A | S | C | T | R | S | A | L | A | L | R | G | R | E | P | E | L | E | G | L | M | L | G | Q | P | G | E | K | V | H | S | R | K | T | L | A | P | T | V | A | Y | G | V | F | R | P | N | Y | G | P | A | A | L | S | N | S | D | T | R | L |
| MZ052128.1_BRBV_SC1_L205 | V    | G    | Q    | L    | V    | F    | N    | G    | T    | A    | A    | G    | F    | K    | D | H | I | C | S | D | G | T | L | P | N | M | F | V | I | T | A | N | T | Q | Y | G | C | G | S | I | L | V | K | D | G | S | H | T | V | I | I | G | I | H | S | A | G | G | N | G | K | G | Y | A | S | C | T | R | S | A | L | A | L | R | G | R | E | P | E | L | E | G | L | M | L | G | Q | P | G | E | K | V | H | S | R | K | T | L | A | P | T | V | A | Y | G | V | F | R | P | N | Y | G | P | A | A | L | S | N | S | D | T | R | L |
| OL410606.1_BRBV_B10      | V    | G    | Q    | L    | V    | F    | N    | G    | T    | A    | A    | G    | F    | K    | D | H | I | C | S | D | G | T | L | P | N | M | F | V | I | T | A | N | T | Q | Y | G | C | G | S | I | L | V | K | D | G | S | H | T | V | I | I | G | I | H | S | A | G | G | N | G | K | G | Y | A | S | C | T | R | S | A | L | A | L | R | G | R | E | P | E | L | E | G | L | M | L | G | Q | P | G | E | K | V | H | S | R | K | T | L | A | P | T | V | A | Y | G | V | F | R | P | N | Y | G | P | A | A | L | S | N | S | D | T | R | L |
| KY432299.1_BRBV_2_SWE1   | V    | G    | Q    | L    | V    | F    | N    | G    | T    | A    | A    | G    | F    | K    | D | H | I | C | S | D | G | T | L | P | N | M | F | V | I | T | A | N | T | Q | Y | G | C | G | S | I | L | V | K | D | G | S | H | T | V | I | I | G | I | H | S | A | G | G | N | G | K | G | Y | A | S | C | T | R | S | A | L | A | L | R | G | R | E | P | E | L | E | G | L | M | L | G | Q | P | G | E | K | V | H | S | R | K | T | L | A | P | T | V | A | Y | G | V | F | R | P | N | Y | G | P | A | A | L | S | N | S | D | T | R | L |
| MT160419.1_BRBV_CHN1     | V    | G    | Q    | L    | V    | F    | N    | G    | T    | A    | A    | G    | F    | K    | D | H | I | C | S | D | G | T | L | P | N | M | F | V | I | T | A | N | T | Q | Y | G | C | G | S | I | L | V | K | D | G | S | H | T | V | I | I | G | I | H | S | A | G | G | N | G | K | G | Y | A | S | C | T | R | S | A | L | A | L | R | G | R | E | P | E | L | E | G | L | M | L | G | Q | P | G | E | K | V | H | S | R | K | T | L | A | P | T | V | A | Y | G | V | F | R | P | N | Y | G | P | A | A | L | S | N | S | D | T | R | L |
| MZ574106.1_BRBV_6900     | V    | G    | Q    | L    | V    | F    | N    | G    | T    | A    | A    | G    | F    | K    | D | H | I | C | S | D | G | T | L | P | N | M | F | V | I | T | A | N | T | Q | Y | G | C | G | S | I | L | V | K | D | G | S | H | T | V | I | I | G | I | H | S | A | G | G | N | G | K | G | Y | A | S | C | T | R | S | A | L | A | L | R | G | R | E | P | E | L | E | G | L | M | L | G | Q | P | G | E | K | V | H | S | R | K | T | L | A | P | T | V | A | Y | G | V | F | R | P | N | Y | G | P | A | A | L | S | N | S | D | T | R | L |
| KUI59357.1_BRBV_MexB10   | V    | G    | Q    | L    | V    | F    | N    | G    | T    | A    | A    | G    | F    | K    | D | H | I | C | S | D | G | T | L | P | N | M | F | V | I | T | A | N | T | Q | Y | G | C | G | S | I | L | V | K | D | G | S | H | T | V | I | I | G | I | H | S | A | G | G | N | G | K | G | Y | A | S | C | T | R | S | A | L | A | L | R | G | R | E | P | E | L | E | G | L | M | L | G | Q | P | G | E | K | V | H | S | R | K | T | L | A | P | T | V | A | Y | G | V | F | R | P | N | Y | G | P | A | A | L | S | N | S | D | T | R | L |
| KUI68861.1_BRBV_4_TCH5   | V    | G    | Q    | L    | V    | F    | N    | G    | T    | A    | A    | G    | F    | K    | D | H | I | C | S | D | G | T | L | P | N | M | F | V | I | T | A | N | T | Q | Y | G | C | G | S | I | L | V | K | D | G | S | H | T | V | I | I | G | I | H | S | A | G | G | N | G | K | G | Y | A | S | C | T | R | S | A | L | A | L | R | G | R | E | P | E | L | E | G | L | M | L | G | Q | P | G | E | K | V | H | S | R | K | T | L | A | P | T | V | A | Y | G | V | F | R | P | N | Y | G | P | A | A | L | S | N | S | D | T | R | L |
| KUI59358.1_BRBV_MexB29   | V    | G    | Q    | L    | V    | F    | N    | G    | T    | A    | A    | G    | F    | K    | D | H | I | C | S | D | G | T | L | P | N | M | F | V | I | T | A | N | T | Q | Y | G | C | G | S | I | L | V | K | D | G | S | H | T | V | I | I | G | I | H | S | A | G | G | N | G | K | G | Y | A | S | C | T | R | S | A | L | A | L | R | G | R | E | P | E | L | E | G | L | M | L | G | Q | P | G | E | K | V | H | S | R | K | T | L | A | P | T | V | A | Y | G | V | F | R | P | N | Y | G | P | A | A | L | S | N | S | D | T | R | L |
| EU236594.1_BRBV_1_EC11   | V    | G    | Q    | L    | V    | F    | N    | G    | T    | A    | A    | G    | F    | K    | D | H | I | C | S | D | G | T | L | P | N | M | F | V | I | T | A | N | T | Q | Y | G | C | G | S | I | L | V | K | D | G | S | H | T | V | I | I | G | I | H | S | A | G | G | N | G | K | G | Y | A | S | C | T | R | S | A | L | A | L | R | G | R | E | P | E | L | E | G | L | M | L | G | Q | P | G | E | K | V | H | S | R | K | T | L | A | P | T | V | A | Y | G | V | F | R | P | N | Y | G | P | A | A | L | S | N | S | D | T | R | L |
| NC_010354.1_BRBV_1_EC11  | V    | G    | Q    | L    | V    | F    | N    | G    | T    | A    | A    | G    | F    | K    | D | H | I | C | S | D | G | T | L | P | N | M | F | V | I | T | A | N | T | Q | Y | G | C | G | S | I | L | V | K | D | G | S | H | T | V | I | I | G | I | H | S | A | G | G | N | G | K | G | Y | A | S | C | T | R | S | A | L | A | L | R | G | R | E | P | E | L | E | G | L | M | L | G | Q | P | G | E | K | V | H | S | R | K | T | L | A | P | T | V | A | Y | G | V | F | R | P | N | Y | G | P | A | A | L | S | N | S | D | T | R | L |
| MT700546.1_BRBV          | V    | G    | Q    | L    | V    | F    | N    | G    | T    | A    | A    | G    | F    | K    | D | H | I | C | S | D | G | T | L | P | N | M | F | V | I | T | A | N | T | Q | Y | G | C | G | S | I | L | V | K | D | G | S | H | T | V | I | I | G | I | H | S | A | G | G | N | G | K | G | Y | A | S | C | T | R | S | A | L | A | L | R | G | R | E | P | E | L | E | G | L | M | L | G | Q | P | G | E | K | V | H | S | R | K | T | L | A | P | T | V | A | Y | G | V | F | R | P | N | Y | G | P | A | A | L | S | N | S | D | T | R | L |
| MT700547.1_BRBV          | V    | G    | Q    | L    | V    | F    | N    | G    | T    | A    | A    | G    | F    | K    | D | H | I | C | S | D | G | T | L | P | N | M | F | V | I | T | A | N | T | Q | Y | G | C | G | S | I | L | V | K | D | G | S | H | T | V | I | I | G | I | H | S | A | G | G | N | G | K | G | Y | A | S | C | T | R | S | A | L | A | L | R | G | R | E | P | E | L | E | G | L | M | L | G | Q | P | G | E | K | V | H | S | R | K | T | L | A | P | T | V | A | Y | G | V | F | R | P | N | Y | G | P | A | A | L | S | N | S | D | T | R | L |
| KUI68862.1_BRBV_TCH8     | V    | G    | Q    | L    | V    | F    | N    | G    | T    | A    | A    | G    | F    | K    | D | H | I | C | S | D | G | T | L | P | N | M | F | V | I | T | A | N | T | Q | Y | G | C | G | S | I | L | V | K | D | G | S | H | T | V | I | I | G | I | H | S | A | G | G | N | G | K | G | Y | A | S | C | T | R | S | A | L | A | L | R | G | R | E | P | E | L | E | G | L | M | L | G | Q | P | G | E | K | V | H | S | R | K | T | L | A | P | T | V | A | Y | G | V | F | R | P | N | Y | G | P | A | A | L | S | N | S | D | T | R | L |
| KP264980.1_BRBV_BSRI1    | V    | G    | Q    | L    | V    | F    | N    | G    | T    | A    | A    | G    | F    | K    | D | H | I | C | S | D | G | T | L | P | N | M | F | V | I | T | A | N | T | Q | Y | G | C | G | S | I | L | V | K | D | G | S | H | T | V | I | I | G | I | H | S | A | G | G | N | G | K | G | Y | A | S | C | T | R | S | A | L | A | L | R | G | R | E | P | E | L | E | G | L | M | L | G | Q | P | G | E | K | V | H | S | R | K | T | L | A | P | T | V | A | Y | G | V | F | R | P | N | Y | G | P | A | A | L | S | N | S | D | T | R | L |
| OL410605.1_BRBV_D2       | V    | G    | Q    | L    | V    | F    | N    | G    | T    | A    | A    | G    | F    | K    | D | H | I | C | S | D | G | T | L | P | N | M | F | V | I | T | A | N | T | Q | Y | G | C | G | S | I | L | V | K | D | G | S | H | T | V | I | I | G | I | H | S | A | G | G | N | G | K | G | Y | A | S | C | T | R | S | A | L | A | L | R | G | R | E | P | E | L | E | G | L | M | L | G | Q | P | G | E | K | V | H | S | R | K | T | L | A | P | T | V | A | Y | G | V | F | R | P | N | Y | G | P | A | A | L | S | N | S | D | T | R | L |
| KUI59360.1_BRBV_5_MexB09 | V    | G    | Q    | L    | V    | F    | N    | G    | T    | A    | A    | G    | F    | K    | D | H | I | C | S | D | G | T | L | P | N | M | F | V | I | T | A | N | T | Q | Y | G | C | G | S | I | L | V | K | D | G | S | H | T | V | I | I | G | I | H | S | A | G | G | N | G | K | G | Y | A | S | C | T | R | S | A | L | A | L | R | G | R | E | P | E | L | E | G | L | M | L | G | Q | P | G | E | K | V | H | S | R | K | T | L | A | P | T | V | A | Y | G | V | F | R | P | N | Y | G | P | A | A | L | S | N | S | D | T | R | L |
| KP264975.1_BRBV_3_BSRI3  | V    | G    | Q    | L    | V    | F    | N    | G    | T    | A    | A    | G    | F    | K    | D | H | I | C | S | D | G | T | L | P | N | M | F | V | I | T | A | N | T | Q | Y | G | C | G | S | I | L | V | K | D | G | S | H | T | V | I | I | G | I | H | S | A | G | G | N | G | K | G | Y | A | S | C | T | R | S | A | L | A | L | R | G | R | E | P | E | L | E | G | L | M | L | G | Q | P | G | E | K | V | H | S | R | K | T | L | A | P | T | V | A | Y | G | V | F | R | P | N | Y | G | P | A | A | L | S | N | S | D | T | R | L |
| KUI59361.1_BRBV_MexB48   | V    | G    | Q    | L    | V    | F    | N    | G    | T    | A    | A    | G    | F    | K    | D | H | I | C | S | D | G | T | L | P | N | M | F | V | I | T | A | N | T | Q | Y | G | C | G | S | I | L | V | K | D | G | S | H | T | V | I | I | G | I | H | S | A | G | G | N | G | K | G | Y | A | S | C | T | R | S | A | L | A | L | R | G | R | E | P | E | L | E | G | L | M | L | G | Q | P | G | E | K | V | H | S | R | K | T | L | A | P | T | V | A | Y | G | V | F | R | P | N | Y | G | P | A | A | L | S | N | S |   |   |   |   |



Multiple Sequence Alignment of BRBV

|                          | 2000 | 2010 | 2020 | 2030 | 2040 | 2050 | 2060 | 2070 | 2080 | 2090 | 2100 | 2110 | 2120 |   |   |   |   |   |   |   |   |   |   |   |   |   |   |   |   |   |   |   |   |   |   |   |   |   |   |   |   |   |   |   |   |   |   |   |   |   |   |   |   |   |   |   |   |   |   |   |   |   |   |   |   |   |   |   |   |   |   |   |   |   |   |   |   |   |   |   |   |   |   |   |   |   |   |   |   |   |   |   |   |   |   |   |   |   |   |   |   |   |   |   |   |   |   |   |   |   |   |   |   |   |   |   |   |   |   |   |   |   |   |   |   |   |   |   |   |   |   |   |   |   |
|--------------------------|------|------|------|------|------|------|------|------|------|------|------|------|------|---|---|---|---|---|---|---|---|---|---|---|---|---|---|---|---|---|---|---|---|---|---|---|---|---|---|---|---|---|---|---|---|---|---|---|---|---|---|---|---|---|---|---|---|---|---|---|---|---|---|---|---|---|---|---|---|---|---|---|---|---|---|---|---|---|---|---|---|---|---|---|---|---|---|---|---|---|---|---|---|---|---|---|---|---|---|---|---|---|---|---|---|---|---|---|---|---|---|---|---|---|---|---|---|---|---|---|---|---|---|---|---|---|---|---|---|---|---|---|---|---|
| MZ052127.1_BRBV_SC1_LZ02 | T    | R    | I    | V    | D    | V    | L    | P    | L    | E    | H    | I    | V    | F | S | R | K | Y | L | G | R | F | C | A | A | M | H | R | N | Y | G | P | N | I | G | S | A | V | G | C | D | P | D | V | A | T | Q | E | F | G | T | H | F | S | Q | Y | K | N | V | T | A | I | D | Y | T | A | F | D | S | C | H | S | T | Q | L | M | S | V | M | A | D | E | V | F | S | D | A | H | G | F | D | E | R | A | R | Y | A | V | K | S | L | C | K | T | V | H | A | Y | E | D | K | R | I | T | I | D | G | G | L | P | S | G | C | S | A | T | S | I | L | N | T | V | L | N |
| MZ052128.1_BRBV_SC1_LZ05 | T    | R    | I    | V    | D    | V    | L    | P    | L    | E    | H    | I    | V    | F | S | R | K | Y | L | G | R | F | C | A | A | M | H | R | N | Y | G | P | N | I | G | S | A | V | G | C | D | P | D | V | A | T | Q | E | F | G | T | H | F | S | Q | Y | K | N | T | A | I | D | Y | T | A | F | D | S | C | H | S | T | Q | L | M | S | V | M | A | D | E | V | F | S | D | A | H | G | F | D | E | R | A | R | Y | A | V | K | S | L | C | K | T | V | H | A | Y | E | D | K | R | I | T | I | D | G | G | L | P | S | G | C | S | A | T | S | I | L | N | T | V | L | N |   |
| OL410606.1_BRBV_B10      | T    | R    | I    | V    | D    | V    | L    | P    | L    | E    | H    | I    | V    | F | S | R | K | Y | L | G | R | F | C | A | A | M | H | R | N | Y | G | P | N | I | G | S | A | V | G | C | D | P | D | V | A | T | Q | E | F | G | T | H | F | S | Q | Y | K | N | V | T | A | I | D | Y | T | A | F | D | S | C | H | S | T | Q | L | M | S | V | M | A | D | E | V | F | S | D | A | H | G | F | D | E | R | A | R | Y | A | T | K | S | L | C | K | T | V | H | A | Y | E | D | K | R | I | T | I | D | G | G | L | P | S | G | C | S | A | T | S | I | L | N | T | V | L | N |
| KY432299.1_BRBV_2_SWE1   | T    | R    | I    | V    | D    | V    | L    | P    | L    | E    | H    | I    | V    | F | S | R | K | Y | L | G | R | F | C | A | A | M | H | R | N | Y | G | P | N | I | G | S | A | V | G | C | D | P | D | V | A | T | Q | E | F | G | T | H | F | S | Q | Y | K | N | V | T | A | I | D | Y | T | A | F | D | S | C | H | S | T | Q | L | M | S | V | M | A | D | E | V | F | S | D | A | H | G | F | D | E | R | A | R | Y | A | V | K | S | L | C | K | T | V | H | A | Y | E | D | K | R | I | T | I | D | G | G | L | P | S | G | C | S | A | T | S | I | L | N | T | V | L | N |
| MT160419.1_BRBV_CHN1     | T    | R    | I    | V    | D    | V    | L    | P    | L    | E    | H    | I    | V    | F | S | R | K | Y | L | G | R | F | C | A | A | M | H | R | N | Y | G | P | N | I | G | S | A | V | G | C | D | P | D | V | A | T | Q | E | F | G | T | H | F | S | Q | Y | K | N | V | T | A | I | D | Y | T | A | F | D | S | C | H | S | T | Q | L | M | S | V | M | A | D | E | V | F | S | D | A | H | G | F | D | E | R | A | R | Y | A | V | K | S | L | C | K | T | V | H | A | Y | E | D | K | R | I | T | I | D | G | G | L | P | S | G | C | S | A | T | S | I | L | N | T | V | L | N |
| MZ574106.1_BRBV_6900     | T    | R    | I    | V    | D    | V    | L    | P    | L    | E    | H    | I    | V    | F | S | R | K | Y | L | G | R | F | C | A | A | M | H | R | N | Y | G | P | N | I | G | S | A | V | G | C | D | P | D | V | A | T | Q | E | F | G | T | H | F | S | Q | Y | K | N | V | T | A | I | D | Y | T | A | F | D | S | C | H | S | T | Q | L | M | S | V | M | A | D | E | V | F | S | D | A | H | G | F | D | E | R | A | R | Y | A | T | K | S | L | C | K | T | V | H | A | Y | E | D | K | R | I | T | I | D | G | G | L | P | S | G | C | S | A | T | S | I | L | N | T | V | L | N |
| KU159357.1_BRBV_MexB10   | T    | R    | I    | V    | D    | V    | L    | P    | L    | E    | H    | I    | V    | F | S | R | K | Y | L | G | R | F | C | A | A | M | H | R | N | Y | G | P | N | I | G | S | A | V | G | C | D | P | D | V | A | T | Q | E | F | G | T | H | F | S | Q | Y | K | N | V | T | A | I | D | Y | T | A | F | D | S | C | H | S | T | Q | L | M | S | V | M | A | D | E | V | F | S | D | A | H | G | F | D | E | R | A | R | Y | A | T | K | S | L | C | K | T | V | H | A | Y | E | D | K | R | I | T | I | D | G | G | L | P | S | G | C | S | A | T | S | I | L | N | T | V | L | N |
| KU168861.1_BRBV_4_TCH5   | T    | R    | I    | V    | D    | V    | L    | P    | L    | E    | H    | I    | V    | F | S | R | K | Y | L | G | R | F | C | A | A | M | H | R | N | Y | G | P | N | I | G | S | A | V | G | C | D | P | D | V | A | T | Q | E | F | G | T | H | F | S | R | Y | K | N | V | T | A | I | D | Y | T | A | F | D | S | C | H | S | T | Q | L | M | S | V | M | A | D | E | V | F | S | D | A | Y | G | F | D | E | R | A | R | Y | A | V | K | S | L | C | K | T | V | H | A | Y | E | D | K | R | I | T | I | D | G | G | L | P | S | G | C | S | A | T | S | I | L | N | T | V | L | N |
| KU159358.1_BRBV_MexB29   | T    | R    | I    | V    | D    | V    | L    | P    | L    | E    | H    | I    | V    | F | S | R | K | Y | L | G | R | F | C | A | A | M | H | R | N | Y | G | P | N | I | G | S | A | V | G | C | D | P | D | V | A | T | Q | E | F | G | T | H | F | S | R | Y | K | N | V | T | A | I | D | Y | T | A | F | D | S | C | H | S | T | Q | L | M | S | V | M | A | D | E | V | F | S | D | A | H | G | F | D | E | R | A | R | Y | A | V | K | S | L | C | K | T | V | H | A | Y | E | D | K | R | I | T | I | D | G | G | L | P | S | G | C | S | A | T | S | I | L | N | T | V | L | N |
| EU236594.1_BRBV_1_EC11   | T    | R    | I    | V    | D    | V    | L    | P    | L    | E    | H    | I    | T    | F | S | R | K | Y | L | G | R | F | C | A | A | M | H | R | N | Y | G | P | N | I | G | S | A | V | G | C | D | P | D | V | A | T | Q | E | F | G | T | H | F | S | Q | Y | R | N | V | T | A | I | D | Y | T | A | F | D | S | C | H | S | T | Q | L | M | S | V | M | A | D | E | V | F | S | D | A | Y | G | F | D | E | R | A | R | Y | A | V | K | S | L | C | K | T | V | H | A | Y | E | D | K | R | I | T | I | D | G | G | L | P | S | G | C | S | A | T | S | I | L | N | T | V | L | N |
| NC_010354.1_BRBV_1_EC11  | T    | R    | I    | V    | D    | V    | L    | P    | L    | E    | H    | I    | T    | F | S | R | K | Y | L | G | R | F | C | A | A | M | H | R | N | Y | G | P | N | I | G | S | A | V | G | C | D | P | D | V | A | T | Q | E | F | G | T | H | F | S | Q | Y | R | N | V | T | A | I | D | Y | T | A | F | D | S | C | H | S | T | Q | L | M | S | V | M | A | D | E | V | F | S | D | A | Y | G | F | D | E | R | A | R | Y | A | V | K | S | L | C | K | T | V | H | A | Y | E | D | K | R | I | T | I | D | G | G | L | P | S | G | C | S | A | T | S | I | L | N | T | V | L | N |
| MT700546.1_BRBV          | T    | R    | I    | V    | D    | V    | L    | P    | L    | E    | H    | I    | V    | F | S | R | K | Y | L | G | R | F | C | A | A | M | H | R | N | Y | G | P | N | I | G | S | A | V | G | C | D | P | D | V | A | T | Q | E | F | G | T | H | F | S | Q | Y | K | N | V | T | A | I | D | Y | T | A | F | D | S | C | H | S | T | Q | L | M | S | V | M | A | D | E | V | F | S | D | A | Y | G | F | D | E | R | A | R | Y | A | V | K | S | L | C | K | T | V | H | A | Y | E | D | K | R | I | T | I | D | G | G | L | P | S | G | C | S | A | T | S | I | L | N | T | V | L | N |
| MT700547.1_BRBV          | T    | R    | I    | V    | D    | V    | L    | P    | L    | E    | H    | I    | V    | F | S | R | K | Y | L | G | R | F | C | A | A | M | H | R | N | Y | G | P | N | I | G | S | A | V | G | C | D | P | D | V | A | T | Q | E | F | G | T | H | F | S | Q | Y | K | N | V | T | A | I | D | Y | T | A | F | D | S | C | H | S | T | Q | L | M | S | V | M | A | D | E | V | F | S | D | A | Y | G | F | D | E | R | A | R | Y | A | V | K | S | L | C | K | T | V | H | A | Y | E | D | K | R | I | T | I | D | G | G | L | P | S | G | C | S | A | T | S | I | L | N | T | V | L | N |
| KU168862.1_BRBV_TCH8     | T    | R    | I    | V    | D    | V    | L    | P    | L    | E    | H    | I    | V    | F | S | R | K | Y | L | G | R | F | C | A | A | M | H | R | N | Y | G | P | N | I | G | S | A | V | G | C | D | P | D | V | A | T | Q | E | F | G | T | H | F | S | Q | Y | K | N | V | T | A | I | D | Y | T | A | F | D | S | C | H | S | T | Q | L | M | S | V | M | A | D | E | V | F | S | D | A | Y | G | F | D | E | R | A | R | Y | A | V | K | S | L | C | K | T | V | H | A | Y | E | D | K | R | I | T | I | D | G | G | L | P | S | G | C | S | A | T | S | I | L | N | T | V | L | N |
| KP264980.1_BRBV_BSRI1    | T    | R    | I    | V    | D    | V    | L    | P    | L    | E    | H    | I    | V    | F | S | R | K | Y | L | G | R | F | C | A | A | M | H | R | N | Y | G | P | N | I | G | S | A | V | G | C | D | P | D | V | A | T | Q | E | F | G | T | H | F | S | Q | Y | R | N | V | T | A | I | D | Y | T | A | F | D | S | C | H | S | T | Q | L | M | S | V | M | A | D | E | V | F | S | D | A | Y | G | F | D | E | R | A | R | Y | A | V | K | S | L | C | K | T | V | H | A | Y | E | D | K | R | I | T | I | D | G | G | L | P | S | G | C | S | A | T | S | I | L | N | T | V | L | N |
| OL410605.1_BRBV_D2       | T    | R    | I    | V    | D    | V    | L    | P    | L    | E    | H    | I    | V    | F | S | R | K | Y | L | G | R | F | C | A | A | M | H | R | N | Y | G | P | N | I | G | S | A | V | G | C | D | P | D | V | A | T | Q | E | F | G | T | H | F | S | Q | Y | K | N | V | T | A | I | D | Y | T | A | F | D | S | C | H | S | T | Q | L | M | S | V | M | A | D | E | V | F | S | D | A | Y | G | F | D | E | R | A | R | Y | A | V | K | S | L | C | K | T | V | H | A | Y | E | D | K | R | I | T | I | D | G | G | L | P | S | G | C | S | A | T | S | I | L | N | T | V | L | N |
| KU159360.1_BRBV_5_MexB09 | T    | R    | I    | V    | D    | V    | L    | P    | L    | E    | H    | I    | V    | F | S | R | K | Y | L | G | R | F | C | A | A | M | H | R | N | Y | G | P | N | I | G | S | A | V | G | C | D | P | D | V | A | T | Q | E | F | G | T | H | F | S | Q | Y | K | N | V | T | A | I | D | Y | T | A | F | D | S | C | H | S | T | Q | L | M | S | V | M | A | D | E | L | F | S | D | A | Y | G | F | D | E | R | A | R | Y | A | V | K | S | L | C | K | T | V | H | A | Y | E | D | K | R | I | T | I | D | G | G | L | P | S | G | C | S | A | T | S | I | L | N | T | V | L | N |
| KP264975.1_BRBV_3_BSRI3  | T    | R    | I    | V    | D    | V    | L    | P    | L    | E    | H    | I    | V    | F | S | R | K | Y | L | G | R | F | C | A | A | M | H | R | N | Y | G | P | N | I | G | S | A | V | G | C | D | P | D | V |   |   |   |   |   |   |   |   |   |   |   |   |   |   |   |   |   |   |   |   |   |   |   |   |   |   |   |   |   |   |   |   |   |   |   |   |   |   |   |   |   |   |   |   |   |   |   |   |   |   |   |   |   |   |   |   |   |   |   |   |   |   |   |   |   |   |   |   |   |   |   |   |   |   |   |   |   |   |   |   |   |   |   |   |   |   |   |   |   |   |



MZ004695.1\_CHN1\_LZ10  
 KU159364.1\_USII\_02  
 MZ004696.1\_CHN1\_LZ11  
 KU159364.1\_USII\_02  
 MZ004694.1\_CHN1\_LZ01  
 KU159364.1\_USII\_02  
 KT948520.1\_RS3X  
 KP236128.1\_Sd-1  
 KU159362.1\_BS16-2  
 KP236129.1\_140032-1  
 KU159364.1\_USII\_02  
 KP236129.1\_140032-1  
 KU159364.1\_USII\_02  
 KP236129.1\_140032-1  
 KU159364.1\_USII\_02  
 KP264974.1\_BSRI4  
 KP236128.1\_Sd-1  
 KU159364.1\_USII\_02  
 KP236128.1\_Sd-1  
 KP236129.1\_140032-1  
 KU159364.1\_USII\_02  
 KU159363.1\_MexB15  
 KU159364.1\_USII\_02  
 OP020169.1\_NSWL10  
 OP020166.1\_NSWL9  
 JN936206.1\_H-1  
 OP020164.1\_NSWL15  
 OP020170.1\_NSWL6  
 OP020173.1\_NSWL8  
 OP020162.1\_NSWL6.1  
 OP020168.1\_NSWL3

KU168861.1 BRBV 4 isolate TCH5  
 KP264980.1\_BRBV\_isolate\_BSRI1  
 KU159358.1 BRBV strain MexB29  
 KP264980.1\_BRBV\_isolate\_BSRI1  
 KP264975.1 BRBV 3 isolate BSRI3  
 MZ052127.1 BRBV strain SC1 LZ02  
 KP264980.1\_BRBV\_isolate\_BSRI1  
 MT160419.1\_BRBV\_isolate\_BRBV\_CHN1  
 KU159360.1 BRBV 5 strain MexB09  
 KU168862.1\_BRBV\_isolate\_TCH8  
 KU159357.1\_BRBV\_strain\_MexB10  
 MT700546.1 Bovine rhinitis B virus  
 KU168862.1\_BRBV\_isolate\_TCH8  
 MT700547.1 Bovine rhinitis B virus  
 KU168862.1\_BRBV\_isolate\_TCH8  
 KU168862.1 BRBV isolate TCH8  
 KP236130.1\_BRBV\_strain\_140032-2  
 KP264980.1 BRBV isolate BSRI1  
 KP236130.1\_BRBV\_strain\_140032-2  
 KU159361.1\_BRBV\_strain\_MexB48  
 KU168862.1\_BRBV\_isolate\_TCH8  
 MT700546.1 Bovine rhinitis B virus  
 NC\_010354.1\_BRBV\_1  
 KU159357.1\_BRBV\_strain\_MexB10  
 KU168862.1\_BRBV\_isolate\_TCH8  
 NC\_010354.1\_BRBV\_1  
 KP236130.1\_BRBV\_strain\_140032-2  
 MZ574106.1\_BRBV\_strain\_6900  
 KU159357.1\_BRBV\_strain\_MexB10  
 MT700546.1 Bovine rhinitis B virus  
 KP264980.1\_BRBV\_isolate\_BSRI1  
 KU159360.1 BRBV 5 strain MexB09



# Recombination analysis of BRBV SC1\_LZ02

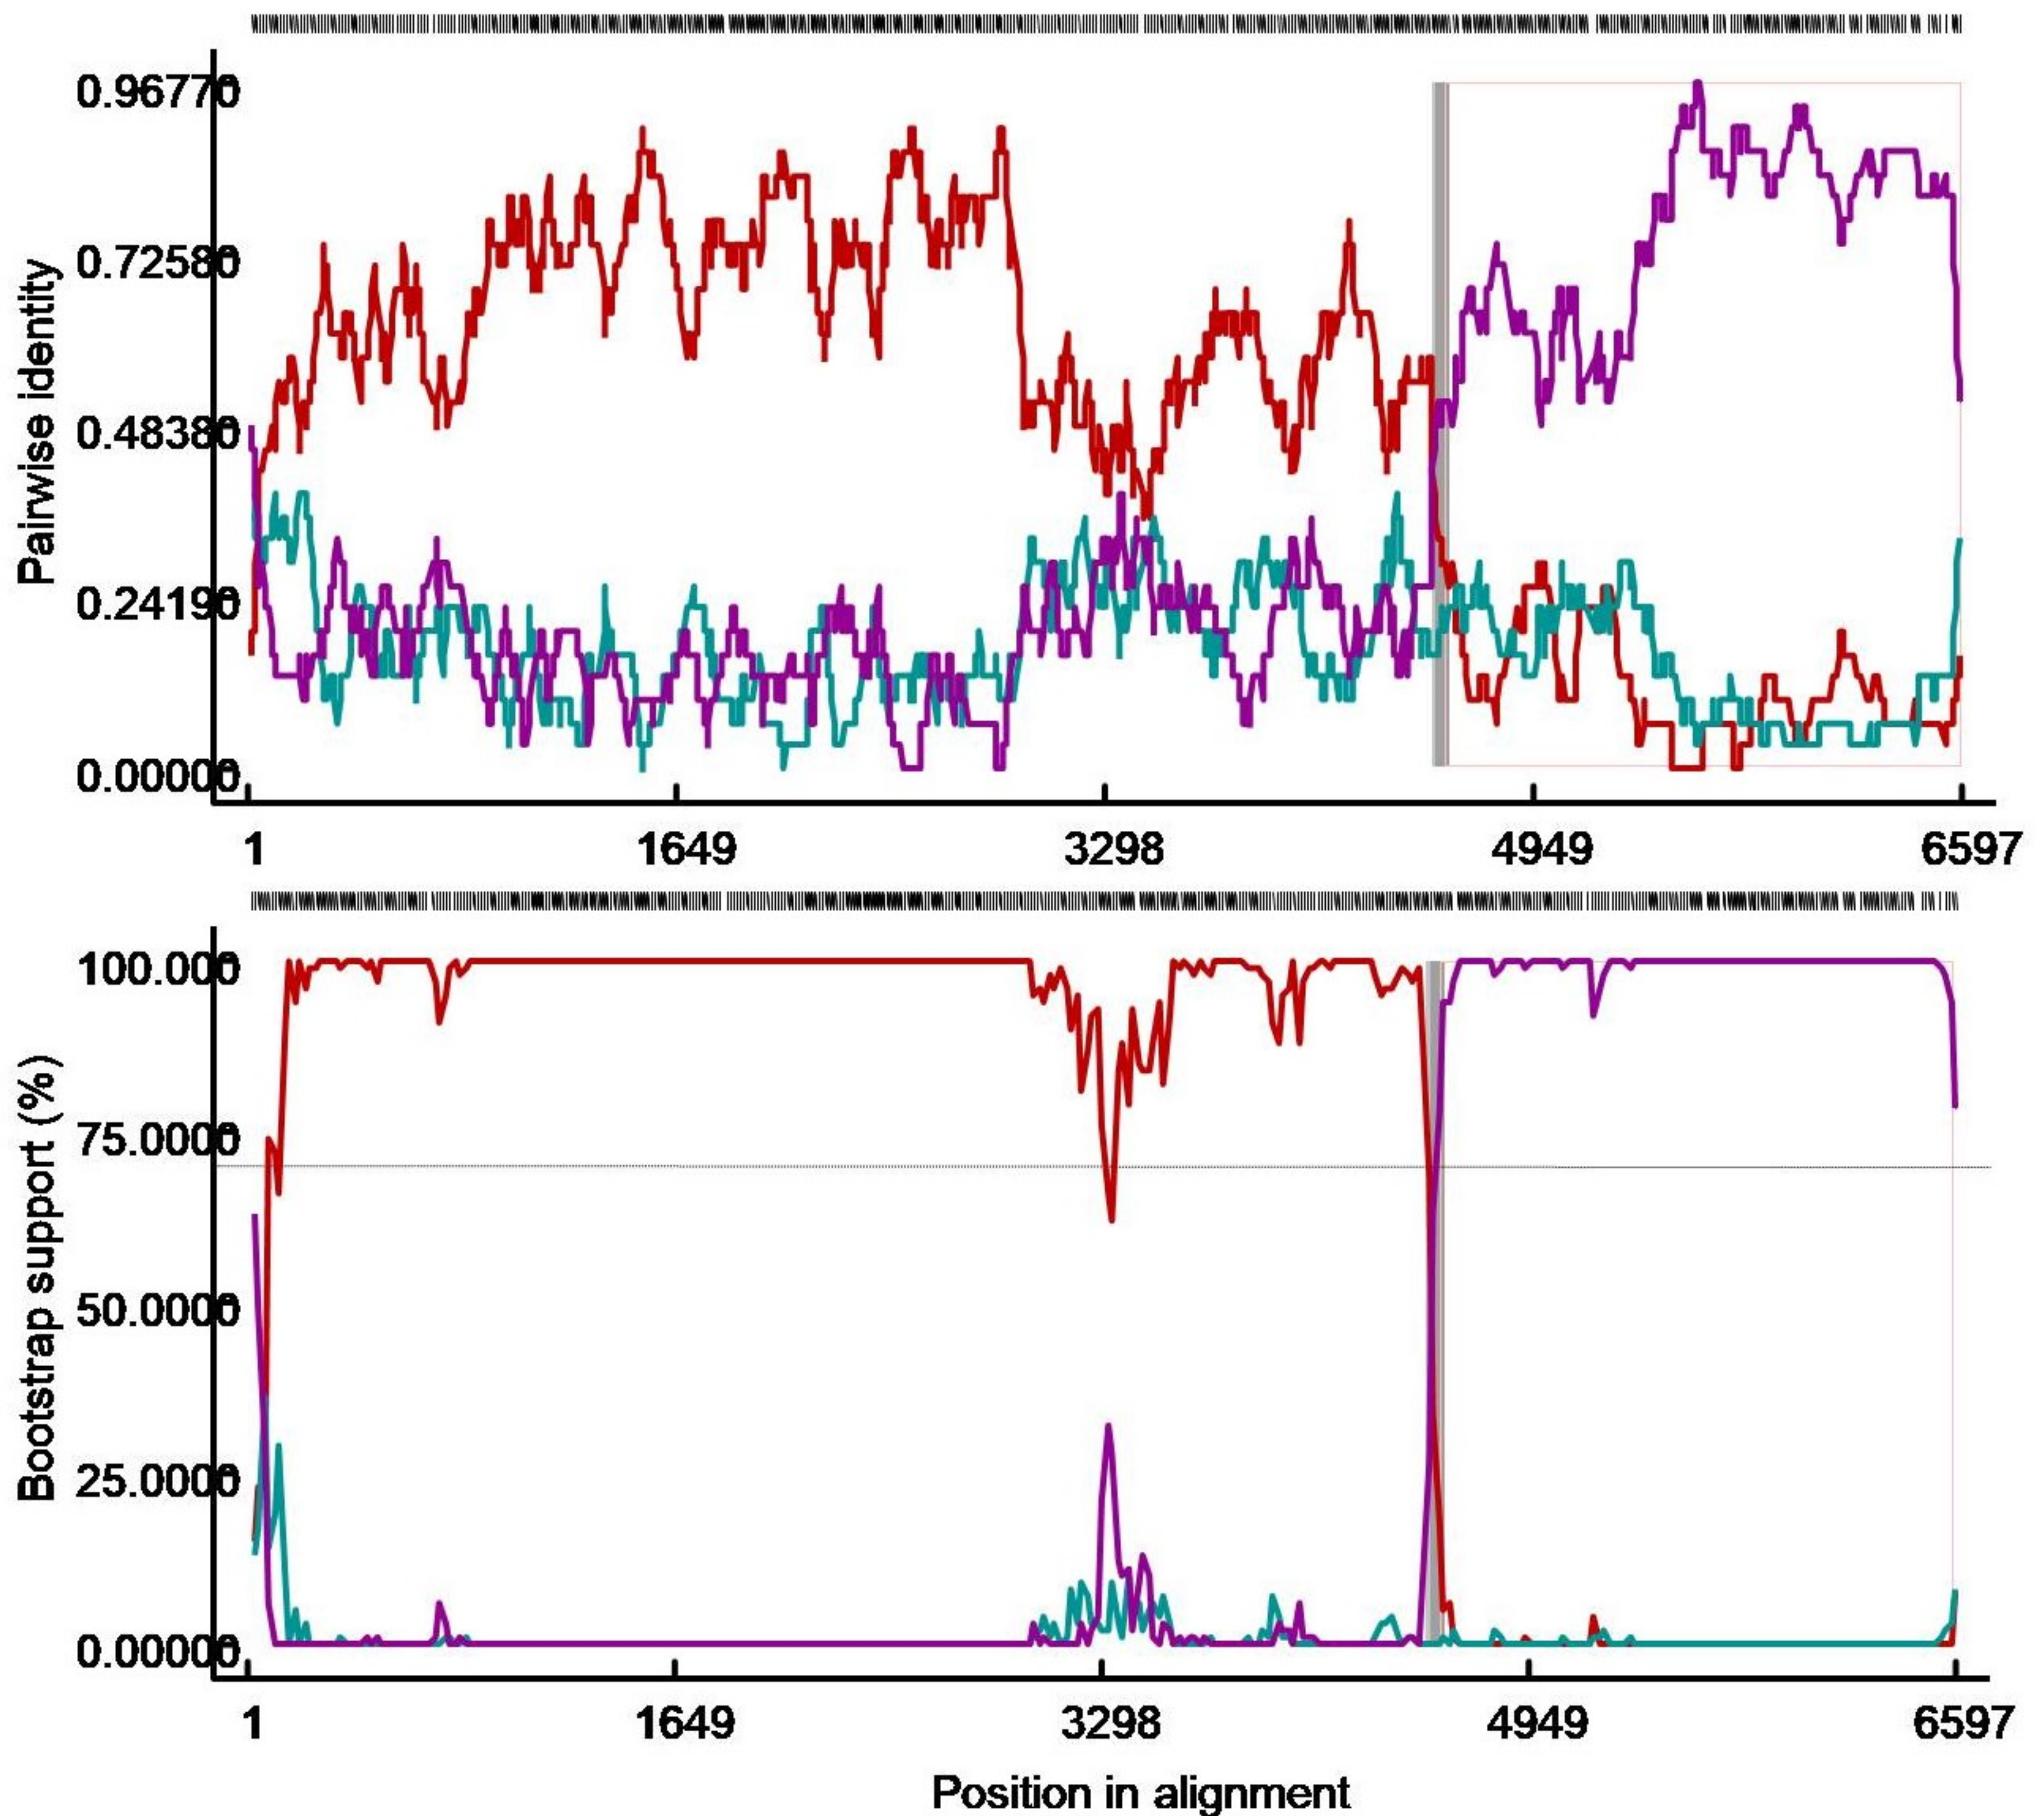

- 95% Breakpoint confidence interval
- 99% Breakpoint confidence interval
- Tract of sequence with a recombinant origin
- MZ574106.1\_BRBV\_strain\_6900 - MT160419.1\_BRBV\_isolate\_BRBV\_CHN1
- MZ574106.1\_BRBV\_strain\_6900 - MZ052127.1\_BRBV\_strain\_SC1\_LZ02
- MT160419.1\_BRBV\_isolate\_BRBV\_CHN1 - MZ052127.1\_BRBV\_strain\_SC1\_LZ02
- (Major Parent - Minor Parent)
- (Major Parent - Recombinant)
- (Minor Parent - Recombinant)
- ... Bonferroni corrected P-Value = 0.05
